# Supplementary material for: MiR-302b as a Combinatorial Therapeutic Approach to Improve Cisplatin Chemotherapy Efficacy in Human Triple-Negative Breast Cancer
Source: Cancers (Basel). 2020 Aug 12;12(8):2261. doi: 10.3390/cancers12082261 (PMC7464985; doi:10.3390/cancers12082261)
Supplement: Supplementary file 1 [file cancers-12-02261-s001.zip]

Archive with 12 entries (12 files):
- supplementary figure legends.pdf
- ST1.xlsx
- ST2.xlsx
- ST3.xlsx
- Supplementary Figure 1.jpg
- Supplementary Figure 2.jpeg
- Supplementary Figure 3.jpg
- Supplementary Figure 4.jpg
- Supplementary Figure 5.jpeg
- Supplementary Figure 6.jpg
- Supplementary Figure 7.jpeg
- supplementary figure legends.docx
