# Supplementary material for: MiR-302b as a Combinatorial Therapeutic Approach to Improve Cisplatin Chemotherapy Efficacy in Human Triple-Negative Breast Cancer
Source: Cancers (Basel). 2020 Aug 12;12(8):2261. doi: 10.3390/cancers12082261 (PMC7464985; doi:10.3390/cancers12082261)
Supplement: Supplementary file 1 [file cancers-12-02261-s001.zip › ST1.xlsx]

## Sheet: miR302b+Cis vs Control+Cis
ST1: Gene expresion profiles of in-vivo assay evalauted by microarray analysis
Gene	logFC	AveExpr	t	P.Value	adj.P.Val	B
CCDC60	0.527992	7.70905	7.09874	2.9165e-07	0.0037792	6.12306
PBLD	0.672417	7.71613	5.75025	7.07604e-06	0.0458456	3.52822
CDKN2C	-0.576668	9.49342	-5.58344	1.06425e-05	0.0459686	3.18814
CAPRIN1	0.620583	9.12122	5.28653	2.21342e-05	0.0703823	2.57425
RAB6B	0.684793	7.89632	5.20406	2.71578e-05	0.0703823	2.40197
L3MBTL2	-0.431847	9.74677	-5.01747	4.32082e-05	0.0728365	2.00968
RIMKLB	-0.279681	9.1619	-4.95374	5.06558e-05	0.0728365	1.87498
LRRC49	-0.353833	9.14963	-4.91072	5.64017e-05	0.0728365	1.78387
CALN1	0.405311	9.11804	4.90881	5.66717e-05	0.0728365	1.77982
SUGT1P3	0.306963	7.74656	4.87482	6.16978e-05	0.0728365	1.70772
ZMIZ2	-1.43333	9.16867	-4.82676	6.9578e-05	0.0728365	1.60564
FCGR3A	0.416391	8.46204	4.81718	7.12657e-05	0.0728365	1.58527
ARHGEF40	0.428089	8.36955	4.80718	7.30725e-05	0.0728365	1.56399
DPH1	0.231787	7.81507	4.76073	8.20838e-05	0.0759744	1.46512
HSPBP1	0.403522	9.16302	4.63745	0.000111792	0.0923805	1.20209
ALPI	0.46956	7.783	4.62941	0.000114068	0.0923805	1.18492
HMP19	0.454061	8.14482	4.58514	0.00012746	0.0959398	1.09026
WDFY1	-0.346444	10.9486	-4.54155	0.000142186	0.0959398	0.996964
TMEM151A	0.542019	7.56419	4.52458	0.000148371	0.0959398	0.960615
UBD	-0.487423	7.92074	-4.50977	0.000153985	0.0959398	0.928903
TRIM36	-0.39054	8.49374	-4.50591	0.000155482	0.0959398	0.920641
LOC100507599	-0.317684	8.49523	-4.43824	0.000184252	0.105396	0.775598
TNFSF10	-0.674749	9.10457	-4.37814	0.000214229	0.105396	0.646711
TBL3	0.524308	8.65679	4.36021	0.000224081	0.105396	0.608249
SNAP91	-0.383201	8.0891	-4.35901	0.000224757	0.105396	0.605673
KCND3	0.552419	7.97018	4.35797	0.000225347	0.105396	0.603431
CD3EAP	0.358069	8.40196	4.3497	0.00023007	0.105396	0.585684
ZNF333	-0.350392	8.78004	-4.34449	0.000233094	0.105396	0.57451
C4orf47	-0.313093	8.03651	-4.33976	0.000235876	0.105396	0.56436
ITGA6	-0.635536	9.4161	-4.28031	0.000273789	0.118259	0.436779
FGF18	0.283071	8.08232	4.25503	0.000291697	0.121564	0.382526
ARL6IP5	-0.2743	12.2816	-4.24212	0.000301291	0.121564	0.354812
ANKRD37	-0.48426	10.5406	-4.23128	0.000309585	0.121564	0.331552
CASC15	-0.493017	8.44139	-4.19521	0.000338857	0.125477	0.254151
SLC26A8	0.352154	7.72797	4.19514	0.000338917	0.125477	0.253998
GIT1	0.302093	9.69639	4.18226	0.000350029	0.125991	0.226356
ULK3	0.392819	8.42332	4.15995	0.000370136	0.129628	0.178487
RP1L1	0.347651	7.58213	4.14623	0.000383069	0.129712	0.149051
PPP3CA	-0.395815	9.37245	-4.13859	0.000390462	0.129712	0.132664
USP33	-0.278841	9.19601	-4.11849	0.000410603	0.129712	0.089547
MUM1	0.365668	10.3676	4.10777	0.000421758	0.129712	0.0665654
GCNT1	-0.336006	8.73947	-4.09109	0.000439722	0.129712	0.0308021
SLC11A2	-0.299831	10.1499	-4.07304	0.000460022	0.129712	-0.0078993
CCNF	0.378789	11.1311	4.06291	0.000471823	0.129712	-0.029622
EFNA1	-0.431813	8.77541	-4.06256	0.000472235	0.129712	-0.0303702
IFT74	-0.32305	10.014	-4.06066	0.000474479	0.129712	-0.0344357
PITPNA	0.300695	8.92558	4.05385	0.000482623	0.129712	-0.0490321
VWA7	0.542277	7.79945	4.04965	0.000487714	0.129712	-0.0580313
TMEM140	-0.239102	7.96989	-4.04046	0.000499046	0.129712	-0.0777315
RASSF6	0.425089	9.76514	4.03928	0.000500508	0.129712	-0.0802407
PAQR4	0.274624	10.8457	4.02333	0.000520853	0.132338	-0.114418
DTNA	-0.295728	8.69389	-4.0149	0.000531937	0.132555	-0.13248
PSMD3	0.312489	9.72547	4.004	0.000546608	0.13364	-0.155819
FAM189B	0.409674	8.46276	3.98492	0.000573257	0.137561	-0.196658
PRR5L	-0.401294	9.52844	-3.96784	0.000598207	0.140938	-0.233208
MUT	-0.286288	11.1473	-3.93424	0.000650464	0.150513	-0.305067
WDR34	0.39175	10.4515	3.91068	0.000689778	0.15681	-0.355424
THBS2	-0.545821	8.33577	-3.88969	0.000726773	0.157902	-0.400255
TUBB4B	0.273018	12.8686	3.8874	0.00073093	0.157902	-0.40515
EGFEM1P	0.315314	8.78395	3.88729	0.00073114	0.157902	-0.405397
OSGIN1	-1.18434	9.26569	-3.85837	0.000785662	0.165195	-0.467118
RMRP	-0.369368	8.03182	-3.84901	0.00080416	0.165195	-0.48709
GBP4	-0.384956	8.39844	-3.8424	0.000817475	0.165195	-0.501184
NBN	-0.328519	8.35299	-3.8351	0.000832431	0.165195	-0.516742
ASB16	0.420493	8.2142	3.83507	0.000832506	0.165195	-0.51682
CPLX1	0.328301	7.60761	3.83036	0.000842297	0.165195	-0.526854
DAZAP1	0.376948	11.0008	3.81898	0.000866441	0.165195	-0.551108
MYLIP	-0.367654	10.268	-3.81877	0.000866896	0.165195	-0.551558
MYO3B	0.380752	9.47488	3.79115	0.000928392	0.166677	-0.610375
EPS15L1	0.453351	8.76562	3.79112	0.000928467	0.166677	-0.610445
C4orf33	-0.301134	8.78476	-3.78965	0.000931858	0.166677	-0.613574
CTF1	0.271312	8.08967	3.7885	0.000934508	0.166677	-0.616011
SLC35A4	0.37801	10.6065	3.78623	0.000939789	0.166677	-0.620847
MIR1185-1	0.385556	8.61875	3.78109	0.000951852	0.166677	-0.631793
CKLF	-0.277033	13.2596	-3.75781	0.00100839	0.170379	-0.681306
FLII	0.357208	10.7598	3.75647	0.00101174	0.170379	-0.684153
SNORA17	0.379855	8.35957	3.75619	0.00101244	0.170379	-0.68475
RANBP3	0.305232	8.79654	3.74365	0.00104439	0.170977	-0.71141
PATE3	0.375244	8.99298	3.73836	0.00105815	0.170977	-0.722646
IRX6	0.542948	8.4075	3.72481	0.00109424	0.170977	-0.751422
NEURL4	0.330912	8.60508	3.72441	0.00109532	0.170977	-0.75227
RUFY3	-0.292627	8.64054	-3.72409	0.00109618	0.170977	-0.752949
NRGN	0.311831	10.5712	3.72368	0.0010973	0.170977	-0.753819
HMGXB4	0.827143	9.42151	3.71963	0.00110836	0.170977	-0.762424
C2orf68	0.208659	9.22386	3.70765	0.00114166	0.174043	-0.787828
C11orf54	0.564663	9.1343	3.69881	0.00116689	0.175821	-0.806588
DACH1	-0.306595	8.05585	-3.68963	0.00119365	0.176367	-0.826043
SLC25A3	0.289858	8.58325	3.68825	0.00119774	0.176367	-0.828973
NFIL3	-0.369904	9.63177	-3.65839	0.00128939	0.1791	-0.892239
MBOAT7	0.31715	11.5623	3.65733	0.00129276	0.1791	-0.894476
PABPC4L	-0.299792	9.1211	-3.65511	0.00129984	0.1791	-0.899165
TCEAL8	-0.589643	11.0274	-3.65007	0.00131611	0.1791	-0.909835
OPTN	-0.28133	11.0033	-3.64066	0.001347	0.1791	-0.929734
ITGA3	0.49299	9.35773	3.64025	0.00134838	0.1791	-0.930616
IL1RN	0.609697	7.42872	3.63664	0.00136042	0.1791	-0.938238
NOV	-0.314346	10.3885	-3.6366	0.00136055	0.1791	-0.938321
RGMA	0.334872	8.25943	3.63535	0.00136475	0.1791	-0.940965
RPF1	-0.347312	10.2435	-3.63028	0.00138193	0.1791	-0.9517
USP41	0.339589	8.15665	3.62757	0.00139118	0.1791	-0.957421
NR4A2	-0.50202	9.43819	-3.62476	0.00140085	0.1791	-0.963366
ZNF69	0.316112	13.0221	3.61463	0.00143624	0.1791	-0.984762
OR10V1	0.36107	7.35006	3.61185	0.00144611	0.1791	-0.990637
CRBN	-0.412561	10.4713	-3.61159	0.00144702	0.1791	-0.991178
IL16	0.787616	8.35962	3.5997	0.00148999	0.1791	-1.01628
MIR1227	0.358499	7.5812	3.59866	0.00149379	0.1791	-1.01847
ALYREF	0.384433	10.0162	3.59641	0.0015021	0.1791	-1.02322
UPF1	0.403238	10.031	3.59266	0.00151602	0.1791	-1.03113
CX3CL1	-0.238249	7.70048	-3.59165	0.00151979	0.1791	-1.03326
NUP188	0.31556	10.0408	3.58755	0.00153519	0.1791	-1.04191
HOXA7	0.376171	7.4743	3.58502	0.00154477	0.1791	-1.04724
NSUN7	-0.324161	8.32496	-3.58412	0.00154821	0.1791	-1.04915
RNU4ATAC	-0.384258	8.4975	-3.57884	0.00156841	0.1791	-1.06027
ZNF646	0.300354	8.12278	3.57191	0.00159538	0.1791	-1.07489
IRF2BP1	0.355549	8.88273	3.57185	0.00159562	0.1791	-1.07502
ZBTB8A	-0.279383	8.72246	-3.57029	0.00160174	0.1791	-1.0783
WDR90	0.333215	9.13235	3.56834	0.00160942	0.1791	-1.08241
TMUB1	0.352544	10.832	3.5664	0.00161713	0.1791	-1.0865
ENTHD2	0.349871	8.78975	3.55704	0.00165472	0.18171	-1.1062
CXCL17	0.323612	7.65449	3.55077	0.00168038	0.182977	-1.1194
C21orf58	0.439691	8.61083	3.53506	0.00174639	0.188521	-1.15244
H3F3AP4	-1.96681	13.2101	-3.53181	0.00176038	0.188521	-1.15928
MRPL19	-0.318406	10.1965	-3.52842	0.00177508	0.188537	-1.16641
ARRDC3	-0.489811	9.1362	-3.52059	0.00180948	0.190628	-1.18286
PTPRG	-0.324398	10.0725	-3.50705	0.00187052	0.191081	-1.2113
BCAN	-0.2971	7.74177	-3.50652	0.00187295	0.191081	-1.21241
SUGCT	0.347006	7.76664	3.49978	0.00190411	0.191081	-1.22655
SCAF4	0.322924	10.3755	3.49522	0.00192544	0.191081	-1.2361
HECTD4	0.333714	10.0873	3.49223	0.00193958	0.191081	-1.24238
PKD1	0.30923	8.10061	3.49222	0.00193963	0.191081	-1.2424
TXNL4A	0.297107	8.07338	3.4892	0.00195401	0.191081	-1.24873
UBL7	0.276961	9.27763	3.48429	0.00197761	0.191081	-1.25902
LENG8	0.372712	8.68147	3.48391	0.00197947	0.191081	-1.25982
ZNF555	-0.256228	7.82685	-3.4831	0.00198341	0.191081	-1.26153
NBPF11	-0.257577	8.14453	-3.47987	0.00199911	0.191081	-1.26828
RIC8A	0.196154	12.0925	3.47445	0.00202578	0.191081	-1.27964
ZBTB44	-0.291086	9.48732	-3.47138	0.00204103	0.191081	-1.28606
FMNL1	0.259526	8.42683	3.46099	0.00209351	0.191081	-1.30782
VSX2	0.418239	7.77928	3.45819	0.00210788	0.191081	-1.31368
IRAK1BP1	-0.258885	8.19139	-3.45753	0.00211127	0.191081	-1.31506
USH1G	0.778631	8.93245	3.45655	0.00211636	0.191081	-1.31712
SOX30	0.429578	7.76726	3.45628	0.00211771	0.191081	-1.31766
SLC13A3	0.423192	7.8408	3.4479	0.00216151	0.191081	-1.3352
TSPAN17	1.31133	10.4806	3.4448	0.00217791	0.191081	-1.34168
CNPY3	0.308633	9.57464	3.4377	0.00221598	0.191081	-1.35652
CEP104	0.242269	8.45434	3.43684	0.00222064	0.191081	-1.35832
PIFO	-0.2333	7.8412	-3.43472	0.0022321	0.191081	-1.36273
MON1B	0.300707	9.14862	3.4346	0.00223278	0.191081	-1.36299
FAM69A	-0.282241	9.80015	-3.43315	0.0022407	0.191081	-1.36602
IER5L	0.346724	9.07142	3.43056	0.0022549	0.191081	-1.37144
NINL	0.27627	8.47528	3.43005	0.00225766	0.191081	-1.37248
CDS1	-0.27756	8.22465	-3.42529	0.00228401	0.191081	-1.38242
TMEM120B	0.230286	8.07324	3.42506	0.00228533	0.191081	-1.38292
BTN3A3	-0.306388	8.86678	-3.42501	0.00228558	0.191081	-1.38301
SLC17A9	0.360275	9.47122	3.42353	0.00229387	0.191081	-1.38611
PRKD2	0.399976	9.0417	3.42258	0.00229918	0.191081	-1.38809
DDX54	0.221416	9.37103	3.42167	0.00230424	0.191081	-1.38997
B3GALT6	0.286353	9.8406	3.41268	0.0023553	0.191081	-1.40875
MAL2	-0.29935	7.61921	-3.40249	0.00241446	0.191081	-1.42999
C11orf70	-0.301982	8.53307	-3.40138	0.00242096	0.191081	-1.43229
SNAPC3	-0.286123	8.96696	-3.40101	0.00242315	0.191081	-1.43306
UACA	-0.372246	8.39087	-3.40037	0.0024269	0.191081	-1.43439
SUPT6H	0.340753	9.37936	3.39978	0.00243038	0.191081	-1.43561
PEAR1	0.263383	8.86903	3.39968	0.00243103	0.191081	-1.43584
ENGASE	0.256014	8.55327	3.39863	0.00243721	0.191081	-1.43802
CACHD1	-0.284668	8.02316	-3.39793	0.00244138	0.191081	-1.43948
SNORD8	-0.397078	8.07652	-3.39517	0.00245784	0.191081	-1.44523
SLC35C1	0.244583	9.84851	3.39437	0.00246261	0.191081	-1.44689
IMMP2L	-0.257874	8.5095	-3.38665	0.00250925	0.192359	-1.46296
ITCH	-0.318382	9.06732	-3.38126	0.00254238	0.192359	-1.47418
CYP4A11	0.45864	7.51492	3.38009	0.00254959	0.192359	-1.47661
RRS1	0.3722	10.4521	3.37732	0.00256681	0.192359	-1.48237
ATG14	-0.266838	10.7388	-3.3773	0.00256694	0.192359	-1.48242
KLC2	0.394082	8.66984	3.37476	0.00258283	0.192359	-1.4877
RPAIN	-0.166296	12.39	-3.37474	0.00258299	0.192359	-1.48775
PPP6R1	0.362526	9.50341	3.37194	0.00260062	0.192565	-1.49357
NXT2	-0.441476	8.80247	-3.36783	0.00262665	0.192579	-1.5021
DOHH	0.34555	9.04511	3.36722	0.00263054	0.192579	-1.50336
EMC2	-0.359611	8.73757	-3.36485	0.00264574	0.192604	-1.5083
CLPTM1L	0.227772	12.2054	3.36246	0.00266113	0.192642	-1.51326
ARSG	0.292619	7.86677	3.35949	0.00268042	0.19296	-1.51944
KLHL21	0.306375	8.90943	3.35558	0.00270595	0.193722	-1.52755
GTPBP3	0.259584	9.12413	3.34984	0.00274391	0.195135	-1.53947
RCOR3	-0.303188	10.2228	-3.34764	0.00275853	0.195135	-1.54402
FAM195B	0.340464	10.5871	3.34447	0.00277985	0.195135	-1.55061
MEN1	0.275413	9.50771	3.34357	0.00278592	0.195135	-1.55247
KLHDC2	-0.258488	11.7303	-3.33692	0.00283115	0.195254	-1.56625
NOP16	0.354877	10.9319	3.3363	0.00283544	0.195254	-1.56755
PDE5A	-0.317275	8.10506	-3.33301	0.00285809	0.195254	-1.57436
STX8	-0.308829	10.7241	-3.33213	0.00286422	0.195254	-1.57619
DTWD1	-0.358641	9.49849	-3.32866	0.00288837	0.195254	-1.58337
SDK2	0.352967	7.7038	3.32423	0.00291953	0.195254	-1.59255
MAD2L1	-0.451662	8.68465	-3.32381	0.00292251	0.195254	-1.59342
HELQ	-0.238537	8.73612	-3.32266	0.00293064	0.195254	-1.5958
POM121L12	0.367359	7.61925	3.32213	0.00293445	0.195254	-1.59691
PIDD1	0.361786	9.04035	3.32158	0.0029383	0.195254	-1.59803
HERC2	0.245354	9.70735	3.3109	0.00301523	0.198495	-1.62014
TBC1D15	-0.230988	9.97413	-3.31056	0.00301771	0.198495	-1.62084
DDX23	0.283187	10.1608	3.30279	0.00307498	0.200446	-1.63692
LOC646034	0.303442	8.74188	3.30234	0.00307831	0.200446	-1.63784
TIMM44	0.263338	10.2674	3.2934	0.00314554	0.203026	-1.65632
HCN3	0.307256	8.71638	3.29291	0.00314927	0.203026	-1.65733
NOLC1	0.220208	10.1722	3.29023	0.0031697	0.203331	-1.66286
FAS	-0.261878	7.68433	-3.28444	0.00321431	0.204613	-1.67481
CD24	-0.552897	9.68234	-3.28355	0.00322126	0.204613	-1.67665
TEX9	-0.247427	7.82993	-3.28035	0.00324618	0.20519	-1.68324
COL2A1	0.452896	7.4663	3.27553	0.00328422	0.206587	-1.6932
AP3D1	0.293076	10.47	3.26099	0.00340136	0.212451	-1.72315
ATP5C1	-0.373826	12.141	-3.25792	0.00342661	0.212451	-1.72947
SLC40A1	-0.289787	8.54174	-3.25717	0.00343283	0.212451	-1.73102
RPS6KL1	0.245984	8.211	3.25594	0.00344302	0.212451	-1.73355
RUFY1	0.20596	9.9744	3.24972	0.00349498	0.214187	-1.74635
REG3G	0.369703	7.33065	3.24862	0.00350421	0.214187	-1.74861
DPH7	0.350809	8.6137	3.2396	0.00358115	0.217862	-1.76716
SLC9A3R2	0.393842	8.99926	3.23593	0.00361286	0.218764	-1.77469
GBP2	-0.371809	10.3385	-3.22953	0.00366892	0.219381	-1.78784
POLE	0.318012	9.1259	3.22833	0.00367952	0.219381	-1.79031
GCC2	-0.206043	7.97979	-3.22675	0.00369349	0.219381	-1.79354
RRP12	0.283981	9.92078	3.22543	0.00370523	0.219381	-1.79625
MCTS1	-0.449841	10.7675	-3.22516	0.00370771	0.219381	-1.79683
PECR	-0.210118	8.36667	-3.21944	0.00375894	0.220563	-1.80855
KDM3A	-0.365701	10.1487	-3.21914	0.00376172	0.220563	-1.80918
SCARNA9	-0.553841	9.11289	-3.2158	0.00379203	0.221241	-1.81603
VGF	0.287286	9.70159	3.21231	0.00382385	0.221241	-1.82316
OSBPL8	-0.355046	10.6822	-3.21224	0.0038245	0.221241	-1.82331
CHSY1	-0.212791	11.8115	-3.19777	0.00395966	0.228041	-1.85296
TP63	-0.250929	8.09016	-3.18536	0.00407915	0.233883	-1.87833
KIAA1324L	-0.203362	8.62427	-3.17865	0.00414524	0.233982	-1.89205
ADK	0.228889	9.44119	3.17747	0.00415699	0.233982	-1.89446
NBL1	0.426703	10.9489	3.17744	0.00415735	0.233982	-1.89454
ACAD10	0.299355	9.60887	3.17625	0.00416918	0.233982	-1.89696
PIF1	0.237808	8.80416	3.17605	0.00417116	0.233982	-1.89737
SHROOM4	0.34919	11.5531	3.16832	0.00424908	0.236487	-1.91316
MRPS26	0.216455	11.3112	3.168	0.00425231	0.236487	-1.91381
PRR7	0.350382	9.36132	3.16327	0.00430065	0.238153	-1.92345
TEX28	0.297386	7.49088	3.16117	0.00432229	0.238333	-1.92773
MTF2	-0.350209	10.1637	-3.15789	0.00435635	0.239193	-1.93443
FOXK2	0.259864	8.20942	3.14911	0.00444863	0.239801	-1.9523
FAM73B	0.257529	9.44329	3.14748	0.00446599	0.239801	-1.95562
P4HA1	-0.336802	10.6798	-3.14718	0.00446929	0.239801	-1.95625
MIR1237	0.280949	7.68788	3.14663	0.00447514	0.239801	-1.95737
MLLT4-AS1	-0.21684	8.33583	-3.14482	0.00449453	0.239801	-1.96106
BTN3A2	-0.265676	9.43157	-3.14335	0.0045103	0.239801	-1.96404
FAM65C	0.54639	7.77289	3.14316	0.0045123	0.239801	-1.96442
SPTAN1	0.233235	11.2972	3.14287	0.00451546	0.239801	-1.96502
ZNF280D	-0.356412	8.94419	-3.13351	0.00461746	0.240249	-1.98406
MNS1	-0.306895	9.3696	-3.13134	0.00464138	0.240249	-1.98847
CAAP1	-0.273912	9.20857	-3.13051	0.00465061	0.240249	-1.99016
BIN3	0.311799	8.46881	3.12974	0.00465909	0.240249	-1.99171
C7orf55	1.18239	10.2457	3.12852	0.0046727	0.240249	-1.9942
BIRC3	-0.398592	8.71538	-3.12852	0.00467275	0.240249	-1.99421
PSD4	0.275328	8.28453	3.12624	0.00469817	0.240249	-1.99884
DHX32	-0.203313	10.9872	-3.12452	0.00471745	0.240249	-2.00232
HILPDA	-0.336599	9.91644	-3.12263	0.00473878	0.240249	-2.00617
CYP17A1	0.336195	7.4711	3.1226	0.00473914	0.240249	-2.00623
KCNH6	0.262606	14.5921	3.12157	0.00475073	0.240249	-2.00832
ZDHHC18	0.280973	8.8719	3.12091	0.00475826	0.240249	-2.00967
BLOC1S5	-0.254119	10.5166	-3.11954	0.00477379	0.240249	-2.01244
MREG	0.208835	8.12488	3.11869	0.00478346	0.240249	-2.01417
ANKRD52	0.283822	8.41254	3.11605	0.00481364	0.240286	-2.01953
RHBDD3	0.304618	8.66115	3.11355	0.00484236	0.240286	-2.0246
PAQR8	-0.300956	8.93975	-3.11213	0.00485879	0.240286	-2.02748
TLR4	-0.290945	8.99825	-3.11149	0.00486621	0.240286	-2.02878
C17orf97	-0.325128	9.04708	-3.11056	0.00487693	0.240286	-2.03066
ZNF33B	-0.229494	9.61991	-3.10706	0.00491782	0.241049	-2.03777
ZNF256	-0.213648	8.27916	-3.10605	0.00492961	0.241049	-2.03981
ZFAS1	-0.269411	13.2631	-3.10215	0.00497556	0.242381	-2.04772
LRRC71	0.271373	7.85091	3.09736	0.00503252	0.243588	-2.05741
ARPC2	0.260454	8.24871	3.09442	0.00506782	0.243588	-2.06337
EYA2	0.324377	7.26396	3.09399	0.00507301	0.243588	-2.06424
ASB16-AS1	0.263802	8.24112	3.09334	0.00508085	0.243588	-2.06555
REEP4	0.268177	8.90229	3.09125	0.00510621	0.243588	-2.0698
OR52D1	0.428469	7.79287	3.08943	0.00512829	0.243588	-2.07347
SKIV2L2	-0.288893	9.63431	-3.08913	0.00513194	0.243588	-2.07408
CXADR	-0.321138	9.58039	-3.08119	0.00522963	0.245443	-2.09013
ZXDC	0.256969	8.58415	3.07993	0.00524529	0.245443	-2.09268
CSF2	-0.430699	10.5352	-3.07801	0.0052693	0.245443	-2.09657
ZNF114	-0.268977	7.93162	-3.07668	0.00528593	0.245443	-2.09925
OSTCP1	-0.2607	8.85411	-3.07578	0.00529722	0.245443	-2.10107
PIAS2	1.28423	9.06598	3.07454	0.00531279	0.245443	-2.10357
C16orf87	-0.236487	9.32672	-3.07176	0.00534793	0.245443	-2.10918
RNU86	0.278479	8.23722	3.07081	0.00536007	0.245443	-2.11111
SESTD1	-0.233074	9.15893	-3.07008	0.00536934	0.245443	-2.11258
TMEM167B	-0.235914	9.99378	-3.07	0.00537034	0.245443	-2.11274
SLC5A6	0.236222	10.7467	3.06929	0.00537936	0.245443	-2.11417
GLRX3	0.246599	7.78277	3.06392	0.00544839	0.24698	-2.12502
INTU	-0.285876	8.93085	-3.05979	0.00550189	0.24698	-2.13334
DTX2	0.230242	8.73483	3.05758	0.00553079	0.24698	-2.1378
GUSB	0.21238	11.1047	3.05414	0.00557604	0.24698	-2.14473
ELOF1	0.25669	10.9672	3.05319	0.00558856	0.24698	-2.14664
YY1AP1	0.187699	8.01306	3.05239	0.00559924	0.24698	-2.14826
NUMA1	0.351193	9.28118	3.05233	0.00559998	0.24698	-2.14838
ROM1	0.257911	9.06281	3.04932	0.0056401	0.24698	-2.15445
LRRC37BP1	0.294693	9.03037	3.04893	0.00564526	0.24698	-2.15523
RBMX2	0.3771	8.68185	3.04874	0.00564783	0.24698	-2.15562
UNG	0.25602	8.13909	3.04853	0.00565064	0.24698	-2.15604
ARV1	-0.261321	9.65932	-3.04811	0.00565622	0.24698	-2.15688
ZNF669	-0.266154	8.51605	-3.04777	0.00566083	0.24698	-2.15757
TRIM69	-0.260961	8.46519	-3.04495	0.00569866	0.247444	-2.16324
PTRF	0.206861	14.4655	3.04379	0.0057143	0.247444	-2.16557
KIF27	-0.291859	8.21561	-3.04183	0.00574086	0.247444	-2.16951
SLFN5	-0.31266	8.5593	-3.04122	0.00574914	0.247444	-2.17074
BAMBI	-0.279847	9.89649	-3.03652	0.00581341	0.247444	-2.1802
CPVL	-0.300046	11.53	-3.03566	0.00582525	0.247444	-2.18193
UHRF1	0.274232	8.28668	3.03383	0.00585056	0.247444	-2.18562
IQCK	0.459498	9.40896	3.03349	0.00585522	0.247444	-2.18629
CCDC58	-0.508001	8.79953	-3.03245	0.00586965	0.247444	-2.18839
PCIF1	0.23196	8.80363	3.03094	0.00589068	0.247444	-2.19143
XIST	0.307318	8.52687	3.03019	0.00590107	0.247444	-2.19293
DAPK3	0.388531	9.52059	3.02699	0.00594588	0.247444	-2.19936
RIN2	-0.188939	11.0216	-3.02662	0.00595099	0.247444	-2.20009
PRPF6	0.293458	9.39265	3.02484	0.00597609	0.247444	-2.20367
NDFIP1	-0.237051	9.57246	-3.02353	0.00599461	0.247444	-2.2063
KDM5B	-0.265607	11.0623	-3.0235	0.00599506	0.247444	-2.20636
TEX261	0.206637	9.36353	3.02343	0.00599608	0.247444	-2.20651
FDPSP2	0.172837	7.80419	3.02197	0.00601671	0.247506	-2.20943
FAM193B	0.304872	8.70727	3.0087	0.00620808	0.253155	-2.23604
USP22	0.348143	10.0006	3.00731	0.00622847	0.253155	-2.23883
CAPN15	0.419293	8.89059	3.00691	0.00623435	0.253155	-2.23963
DUS3L	0.221217	10.1417	3.0051	0.00626107	0.253155	-2.24327
DYRK4	-0.297647	10.7062	-3.00454	0.00626927	0.253155	-2.24438
STK17A	-0.236615	8.24124	-3.00441	0.00627124	0.253155	-2.24465
LETM1	0.265848	8.92448	3.00291	0.00629346	0.253263	-2.24765
SNORD3D	-0.804124	11.3392	-2.99546	0.00640483	0.256513	-2.26256
SNAPC5	-0.232256	8.11293	-2.99487	0.00641381	0.256513	-2.26375
ERBB3	-0.186537	7.92121	-2.98795	0.00651901	0.25836	-2.27757
NOC4L	0.300909	8.43045	2.9878	0.00652131	0.25836	-2.27787
ST3GAL5	-0.220286	8.47341	-2.98615	0.00654675	0.25836	-2.28118
STK35	0.271898	9.38948	2.98593	0.00655007	0.25836	-2.28161
PSMC3IP	0.230235	9.58091	2.98531	0.00655968	0.25836	-2.28285
FBXL18	0.319878	11.4224	2.97956	0.006649	0.261084	-2.29434
MINK1	0.278923	8.59396	2.97465	0.00672622	0.262442	-2.30415
NOL12	0.825383	9.95504	2.97388	0.00673826	0.262442	-2.30566
ST6GAL1	-0.197311	9.61345	-2.97174	0.00677226	0.262442	-2.30994
TBC1D8B	-0.196859	7.94006	-2.97082	0.00678699	0.262442	-2.31178
TRIM22	-0.393007	8.13323	-2.97054	0.00679148	0.262442	-2.31234
ADCK5	0.268705	8.99059	2.96968	0.0068051	0.262442	-2.31405
SERPINF1	-0.465904	8.42273	-2.96699	0.0068483	0.263324	-2.31942
MAP3K10	0.208127	8.59269	2.96501	0.00688014	0.263468	-2.32336
FGGY	-0.294161	8.77843	-2.96358	0.00690332	0.263468	-2.32621
LOC100129534	0.217791	7.72587	2.96151	0.00693692	0.263468	-2.33033
SLC25A36	-0.370197	10.0768	-2.96101	0.00694513	0.263468	-2.33134
IDO2	0.459356	8.30663	2.96026	0.00695736	0.263468	-2.33283
SNORA21	-0.314755	8.3848	-2.95863	0.00698403	0.263468	-2.33608
MPP4	0.3218	9.16292	2.95799	0.00699437	0.263468	-2.33733
FJX1	0.275006	11.8288	2.95598	0.00702748	0.263948	-2.34134
ATP7A	-0.347242	8.06381	-2.95348	0.0070688	0.264733	-2.34632
GJB2	-0.402061	10.3799	-2.95019	0.00712359	0.266016	-2.35287
SAR1A	-0.249922	10.1064	-2.94724	0.00717304	0.267093	-2.35874
RAD9A	0.292915	8.898	2.94002	0.00729536	0.268975	-2.37308
HSF1	0.370562	8.11735	2.93938	0.00730622	0.268975	-2.37435
AKR1C3	-0.402591	10.3306	-2.9392	0.00730938	0.268975	-2.37471
ZNF680	-0.293956	8.41762	-2.93904	0.00731209	0.268975	-2.37503
CWF19L2	-0.227105	10.1853	-2.93815	0.00732739	0.268975	-2.3768
PECAM1	-0.24435	8.59005	-2.93678	0.00735088	0.269075	-2.37951
KATNBL1	-0.251593	8.55268	-2.93214	0.00743111	0.269982	-2.38872
NOC2L	0.314594	8.88891	2.93102	0.0074505	0.269982	-2.39093
PRRC2A	0.592954	10.9531	2.9302	0.00746482	0.269982	-2.39256
RNF121	0.234174	9.09041	2.92938	0.00747916	0.269982	-2.39419
ZNF416	-0.272976	8.7348	-2.92846	0.00749531	0.269982	-2.39602
LONRF1	-0.235603	8.64356	-2.92744	0.00751315	0.269982	-2.39803
TRIM24	-0.223984	9.09061	-2.92659	0.00752823	0.269982	-2.39973
TMEM80	0.211918	9.05199	2.92547	0.00754792	0.269982	-2.40195
MLYCD	0.208575	8.24337	2.92461	0.00756317	0.269982	-2.40366
PCDHB16	-0.203919	8.06922	-2.9232	0.00758805	0.270126	-2.40644
PUS1	0.305115	9.05217	2.91908	0.00766156	0.271996	-2.41462
BET1L	0.281123	8.89768	2.91423	0.00774867	0.274337	-2.4242
ZNF654	-0.270148	8.84405	-2.91166	0.00779545	0.274383	-2.4293
PPP1R3C	-0.359293	9.1364	-2.9112	0.00780385	0.274383	-2.43021
H2AFX	0.39807	10.995	2.90953	0.0078343	0.274383	-2.43351
UFSP1	0.233846	7.87545	2.90951	0.00783468	0.274383	-2.43356
TPK1	-0.182692	9.17627	-2.90724	0.00787626	0.275096	-2.43804
ACD	0.333725	9.91543	2.90467	0.00792352	0.27593	-2.44311
EIF2S1	-0.301095	9.94266	-2.90339	0.00794719	0.27593	-2.44564
SEZ6L2	-0.693113	9.41605	-2.90162	0.00798022	0.27593	-2.44915
HERC5	-0.280517	11.8521	-2.90134	0.00798533	0.27593	-2.44969
SEMA3E	0.360544	11.453	2.89883	0.00803225	0.276028	-2.45466
NAT9	0.272122	10.525	2.89835	0.00804114	0.276028	-2.4556
RNU5A-1	-0.682683	8.00301	-2.89717	0.00806337	0.276028	-2.45793
DSC2	-0.264334	8.43458	-2.89664	0.00807335	0.276028	-2.45898
TK1	0.244854	11.2076	2.8947	0.00810984	0.276185	-2.4628
ABCB7	-0.278912	9.71715	-2.89388	0.00812539	0.276185	-2.46442
VANGL1	-0.210668	7.82417	-2.89192	0.00816266	0.276185	-2.4683
BBC3	0.257764	8.82405	2.89189	0.00816321	0.276185	-2.46836
CPE	-0.504107	8.9143	-2.89032	0.008193	0.276355	-2.47144
LDHA	-0.245461	9.03402	-2.88616	0.00827271	0.276355	-2.47964
ZMYND19	0.22262	10.7136	2.88615	0.008273	0.276355	-2.47967
FBXL13	-0.252539	8.80178	-2.88389	0.00831655	0.276355	-2.48412
S100A1	0.45806	7.96643	2.8838	0.00831843	0.276355	-2.48431
DONSON	-0.614672	8.53646	-2.88298	0.00833416	0.276355	-2.48591
SLC16A2	0.217006	7.87461	2.88296	0.00833458	0.276355	-2.48595
NACC1	0.371672	9.55667	2.88158	0.00836152	0.276355	-2.48869
LRRN1	-0.175842	7.7745	-2.88144	0.00836418	0.276355	-2.48895
SLC30A1	-0.288898	8.54145	-2.87978	0.0083965	0.276355	-2.49222
TBCE	-0.18902	9.61511	-2.87838	0.00842397	0.276355	-2.49499
LRRC16B	-0.240189	7.7153	-2.87789	0.00843358	0.276355	-2.49595
AGR3	0.335312	7.61713	2.87728	0.00844549	0.276355	-2.49715
RGL1	-0.23789	9.75267	-2.8749	0.00849232	0.277187	-2.50183
CYSTM1	-0.298456	10.0154	-2.87003	0.00858906	0.279528	-2.51141
PBX1	0.279861	7.64454	2.86885	0.00861263	0.279528	-2.51373
MSRB3	-0.251955	9.53733	-2.86725	0.00864464	0.279528	-2.51687
UBE3A	-0.189076	11.3917	-2.86697	0.0086503	0.279528	-2.51743
RNY4	-0.502811	8.58419	-2.86269	0.00873681	0.280966	-2.52585
SPTLC2	0.211915	9.08937	2.86262	0.00873818	0.280966	-2.52598
RAB20	-0.1762	8.00093	-2.85877	0.00881658	0.282785	-2.53354
PLCB1	-0.390436	8.23541	-2.85757	0.00884106	0.28287	-2.53589
GLI3	0.254541	8.81383	2.85559	0.00888193	0.283478	-2.53979
LOC100131831	-0.176329	7.76187	-2.85409	0.0089129	0.283558	-2.54273
SFT2D2	-0.228704	8.19428	-2.85335	0.00892821	0.283558	-2.54418
ZNF598	0.750543	9.31712	2.85082	0.00898064	0.284526	-2.54914
GAGE2B	0.223429	7.7236	2.84913	0.00901594	0.284948	-2.55245
ZNF613	-0.296076	9.39642	-2.84571	0.00908764	0.286488	-2.55915
FAM46C	-0.282809	9.07309	-2.84404	0.00912294	0.286488	-2.56243
C7orf43	0.190336	9.1639	2.84294	0.0091462	0.286488	-2.56459
MADD	0.232872	9.51526	2.84261	0.00915313	0.286488	-2.56523
TOMM40	0.160522	12.7004	2.83799	0.00925161	0.288873	-2.57427
POLR2M	-0.26818	8.04615	-2.83387	0.00934036	0.289068	-2.58235
HBA2	0.633084	7.94078	2.83194	0.00938212	0.289068	-2.58612
VAMP5	-0.213872	8.42423	-2.83104	0.00940153	0.289068	-2.58786
TPTE2P6	-0.173803	7.80465	-2.8306	0.00941128	0.289068	-2.58874
RNU1-3	-0.798739	11.3821	-2.83015	0.00942108	0.289068	-2.58962
CLUH	0.231388	10.1914	2.82939	0.0094375	0.289068	-2.59109
RAB27B	-0.385846	9.95503	-2.82693	0.00949141	0.289068	-2.59591
ADRM1	0.15069	12.9315	2.82683	0.00949364	0.289068	-2.5961
LPCAT4	0.184446	9.22512	2.82632	0.00950474	0.289068	-2.59709
MAP3K14	0.418233	9.18511	2.8262	0.00950738	0.289068	-2.59733
INF2	0.309998	9.32517	2.82549	0.00952299	0.289068	-2.59871
FAM193A	0.243788	9.58779	2.82453	0.00954412	0.289068	-2.60059
NMT1	0.283693	10.0398	2.82217	0.00959636	0.289068	-2.6052
NR2C2AP	0.258983	10.1713	2.82143	0.00961289	0.289068	-2.60665
SMIM10L2B	-0.212592	8.35095	-2.81976	0.00965005	0.289068	-2.60991
RNU4-1	-0.937012	10.4727	-2.81932	0.00965975	0.289068	-2.61076
ODF4	0.404321	7.63956	2.81775	0.00969487	0.289068	-2.61383
CDX2	0.273605	7.46798	2.81582	0.00973828	0.289068	-2.6176
TMEM184A	0.274166	7.43227	2.81523	0.00975139	0.289068	-2.61874
TMEM222	0.27225	8.77274	2.81435	0.00977131	0.289068	-2.62046
ADAM15	0.268064	8.82845	2.81395	0.00978046	0.289068	-2.62125
SERPINA10	0.237595	7.68242	2.8116	0.00983348	0.289068	-2.62582
MLST8	0.309363	9.91021	2.8116	0.00983361	0.289068	-2.62583
SIRT4	-0.202902	8.30478	-2.81125	0.00984152	0.289068	-2.62651
TAPT1	-0.222659	9.0027	-2.81107	0.0098455	0.289068	-2.62685
PSMA2	-0.317954	10.0232	-2.81099	0.0098473	0.289068	-2.62701
ELAC2	0.260369	10.0135	2.809	0.00989281	0.289068	-2.6309
EPSTI1	-0.437905	8.80329	-2.80789	0.00991811	0.289068	-2.63306
IRAK1	0.211653	12.5586	2.80766	0.00992344	0.289068	-2.63351
RAB8A	0.164289	12.5689	2.8075	0.0099271	0.289068	-2.63382
ZNF444	0.296135	9.642	2.80281	0.0100349	0.290905	-2.64295
FUT6	0.346504	8.66211	2.80265	0.0100386	0.290905	-2.64325
ZNF408	0.24051	9.29008	2.80184	0.0100575	0.290905	-2.64484
LYPD3	0.232302	7.81835	2.80054	0.0100877	0.290906	-2.64737
THRA	0.289517	8.1561	2.79836	0.0101385	0.290906	-2.65162
PGLYRP4	0.241541	7.59696	2.79832	0.0101394	0.290906	-2.65169
LRWD1	0.216003	9.90084	2.79798	0.0101474	0.290906	-2.65235
TMEFF1	-0.186128	7.80623	-2.79701	0.0101701	0.290913	-2.65424
FCRL3	0.233269	7.68619	2.79595	0.0101948	0.290978	-2.65629
C8orf59	-0.357713	11.9842	-2.7948	0.010222	0.291113	-2.65854
ZNF415	-0.264465	8.47835	-2.79248	0.0102766	0.291539	-2.66304
SEC16A	0.217521	11.0589	2.79226	0.0102819	0.291539	-2.66347
BTBD6	0.186884	11.6584	2.7907	0.0103189	0.291947	-2.6665
WASH7P	0.358364	8.78829	2.78839	0.0103739	0.292864	-2.67099
LRP6	-0.168222	7.96609	-2.78558	0.0104411	0.294122	-2.67644
PDXP	0.181079	11.2628	2.7842	0.0104744	0.294302	-2.67913
GCSAM	0.21099	8.2019	2.78285	0.010507	0.294302	-2.68175
POLR3C	-0.213437	11.0677	-2.78249	0.0105157	0.294302	-2.68244
CSK	0.241396	11.7878	2.7803	0.0105687	0.29515	-2.68669
HNRNPH2	-0.31013	8.59435	-2.77568	0.0106817	0.29736	-2.69566
CACNA1C-AS4	0.197523	8.00279	2.77401	0.0107225	0.29736	-2.69888
USP16	-0.343311	10.6139	-2.77375	0.0107292	0.29736	-2.6994
NUP62CL	-0.213033	8.91903	-2.7731	0.0107451	0.29736	-2.70065
FEN1	0.21346	13.0992	2.77239	0.0107626	0.29736	-2.70202
RNU4-2	-0.718477	11.5639	-2.77102	0.0107966	0.297664	-2.70468
SLC4A2	0.274548	10.02	2.76981	0.0108267	0.297859	-2.70703
PPAN	0.360207	9.5537	2.76769	0.0108795	0.298035	-2.71113
RSL24D1	-0.192828	12.7464	-2.76762	0.010881	0.298035	-2.71125
YPEL5	-0.252891	11.5735	-2.76679	0.010902	0.298035	-2.71288
SLCO1A2	0.293299	7.65209	2.76413	0.0109686	0.299222	-2.71801
RNU1-1	-0.57345	11.4029	-2.76147	0.0110359	0.299576	-2.72317
RNVU1-7	-0.743846	11.2973	-2.7594	0.0110883	0.299576	-2.72716
GATA3	-0.175415	7.7812	-2.75768	0.0111321	0.299576	-2.73048
DROSHA	-0.198271	7.7444	-2.75752	0.0111363	0.299576	-2.7308
BCAR1	0.30544	9.87116	2.7568	0.0111548	0.299576	-2.7322
XPR1	0.724488	8.58322	2.75519	0.0111958	0.299576	-2.73529
C16orf62	-0.202119	8.18927	-2.75511	0.011198	0.299576	-2.73546
VARS	0.204415	11.4879	2.75427	0.0112196	0.299576	-2.73708
CD81	0.206383	14.179	2.75211	0.0112751	0.299576	-2.74125
CDKL3	-0.2053	8.553	-2.75204	0.0112771	0.299576	-2.74139
CHD2	-0.268944	8.63844	-2.75119	0.0112989	0.299576	-2.74302
GLOD4	-0.155913	11.7401	-2.7502	0.0113247	0.299576	-2.74494
CCDC28A	-0.182657	10.7941	-2.74829	0.0113743	0.299576	-2.74863
PLSCR1	-0.259268	8.7898	-2.74824	0.0113756	0.299576	-2.74872
PID1	-0.245483	8.94522	-2.74784	0.0113859	0.299576	-2.74949
MYB	-0.429129	9.04395	-2.74724	0.0114016	0.299576	-2.75064
AP1M1	0.165867	12.4075	2.746	0.011434	0.299576	-2.75303
GAS2L1	0.246945	8.57091	2.74365	0.0114958	0.299576	-2.75757
TRIM2	-0.30676	8.63231	-2.74231	0.0115312	0.299576	-2.76016
RTP4	-0.220269	7.79355	-2.74229	0.0115317	0.299576	-2.7602
ARSD	-0.260144	8.31413	-2.74167	0.0115479	0.299576	-2.76139
ERAP2	-0.157791	9.28508	-2.74058	0.0115769	0.299576	-2.7635
MRPL40	-0.261794	10.66	-2.74004	0.0115911	0.299576	-2.76453
PXN	0.246301	9.86208	2.73892	0.0116207	0.299576	-2.76668
NDRG4	-0.340559	8.91132	-2.73862	0.0116289	0.299576	-2.76727
PNPLA6	0.264427	12.2681	2.73815	0.0116414	0.299576	-2.76818
KLRC2	-0.379134	8.30192	-2.73724	0.0116655	0.299576	-2.76992
APEX2	0.247018	11.3509	2.73712	0.0116689	0.299576	-2.77016
THOC6	0.275612	10.1247	2.73697	0.0116729	0.299576	-2.77045
RNVU1-18	-0.719849	11.7918	-2.73688	0.0116751	0.299576	-2.77061
TATDN3	-0.215556	8.91283	-2.73496	0.0117264	0.300277	-2.77431
AGAP6	0.722751	9.76505	2.73357	0.011764	0.300277	-2.777
RPH3AL	0.286365	9.37423	2.73291	0.0117815	0.300277	-2.77825
IFRD2	0.232922	10.394	2.73241	0.0117951	0.300277	-2.77922
DAAM1	-0.21812	9.80722	-2.72939	0.0118768	0.301229	-2.78504
ACBD3	-0.238631	11.124	-2.72931	0.011879	0.301229	-2.78519
MIR365A	-0.199499	7.76949	-2.72807	0.0119127	0.301493	-2.78757
ASB7	-0.184435	8.09406	-2.72485	0.0120006	0.303126	-2.79376
OXTR	0.258444	8.91794	2.71833	0.0121804	0.306338	-2.80628
ZNF451	-0.214849	9.62618	-2.71609	0.0122428	0.306338	-2.81059
LMAN2	0.305751	9.30258	2.71514	0.0122694	0.306338	-2.81241
FAM131B	0.207981	7.80281	2.71469	0.0122821	0.306338	-2.81328
NHP2	0.193439	12.8451	2.71326	0.0123222	0.306338	-2.81602
SCAMP4	0.279084	9.02254	2.71312	0.0123261	0.306338	-2.81629
UBA6	-0.195941	10.8321	-2.71311	0.0123264	0.306338	-2.81631
TAF1B	-0.230196	9.87254	-2.71277	0.0123358	0.306338	-2.81695
TRIM32	-0.206383	9.80324	-2.71235	0.0123477	0.306338	-2.81776
SF3B6	-0.224824	13.1685	-2.71033	0.0124047	0.306338	-2.82163
DAP	0.177639	12.0813	2.71016	0.0124095	0.306338	-2.82196
POLR2A	0.201281	12.375	2.70772	0.0124788	0.306338	-2.82664
LZTFL1	-0.241878	9.2823	-2.70747	0.0124857	0.306338	-2.82711
PGRMC2	-0.248402	11.9409	-2.70742	0.0124871	0.306338	-2.82721
TRAF3	0.220791	8.06179	2.70694	0.0125009	0.306338	-2.82813
LAX1	-0.177911	8.01709	-2.70676	0.012506	0.306338	-2.82848
CBX6	0.296233	11.1688	2.70416	0.0125804	0.307456	-2.83347
PDXK	0.268248	11.1238	2.7035	0.0125991	0.307456	-2.83472
CLASRP	0.236217	8.92514	2.70185	0.0126468	0.307778	-2.83789
TSPAN6	-0.29782	9.21383	-2.70139	0.0126598	0.307778	-2.83876
DGCR8	0.254066	10.1498	2.69968	0.0127093	0.308039	-2.84204
KATNB1	0.201801	10.5372	2.69938	0.0127181	0.308039	-2.84262
CHTF18	0.328467	9.934	2.69705	0.0127857	0.308739	-2.84708
ADRA2A	0.197905	8.06296	2.69638	0.0128051	0.308739	-2.84835
SERPINB1	-0.2329	10.7063	-2.69546	0.012832	0.308739	-2.85012
ZNF383	-0.212999	8.21751	-2.693	0.012904	0.308739	-2.85482
DPCD	-0.247537	9.01123	-2.69263	0.0129146	0.308739	-2.85551
NRM	0.283561	9.24302	2.69222	0.0129269	0.308739	-2.85631
TCTA	0.223395	9.14688	2.69056	0.0129757	0.308739	-2.85948
RECQL4	0.44826	9.33947	2.69033	0.0129826	0.308739	-2.85993
SDHAF4	-0.278971	9.22	-2.69019	0.0129867	0.308739	-2.86019
ZNF25	-0.249173	9.54821	-2.68993	0.0129942	0.308739	-2.86068
APBB3	0.73384	11.2105	2.68922	0.0130153	0.308739	-2.86204
METTL17	0.65555	9.66802	2.68862	0.0130329	0.308739	-2.86318
LIMK1	0.25844	8.43266	2.6876	0.0130634	0.308896	-2.86514
TTC39B	-0.148105	8.0705	-2.68607	0.0131089	0.309121	-2.86806
ZFPM2	-0.202363	7.86831	-2.68425	0.013163	0.309121	-2.87152
TAPT1-AS1	0.24209	8.81606	2.68333	0.0131905	0.309121	-2.87328
CXCL1	-0.400079	10.1206	-2.68288	0.0132041	0.309121	-2.87414
BDH1	0.214227	8.6115	2.6827	0.0132096	0.309121	-2.87449
UBALD1	0.283807	9.69709	2.68248	0.013216	0.309121	-2.8749
PLXDC2	-0.250265	8.3577	-2.68159	0.0132427	0.309186	-2.87659
SPEN	0.279295	11.0685	2.67964	0.0133015	0.310001	-2.88032
HOOK3	-0.19145	8.46641	-2.67831	0.0133419	0.310266	-2.88286
NDUFS8	0.195065	13.6877	2.67737	0.0133703	0.310266	-2.88466
PDZD11	0.289972	7.80984	2.67689	0.0133847	0.310266	-2.88556
GDPD5	0.209054	9.49721	2.67502	0.0134417	0.310554	-2.88912
ELF4	0.198305	10.1017	2.67491	0.0134451	0.310554	-2.88934
MPC1	-1.10044	10.6256	-2.67282	0.0135089	0.311475	-2.89332
SNHG17	0.211475	10.902	2.67013	0.0135916	0.312456	-2.89844
PJA2	-0.222089	12.4353	-2.66944	0.013613	0.312456	-2.89976
GPN3	-0.175357	7.73468	-2.66785	0.0136619	0.312456	-2.90278
LYPLAL1	-0.415674	9.69258	-2.6674	0.0136759	0.312456	-2.90363
DYNC1I2	-0.151606	12.0804	-2.66698	0.013689	0.312456	-2.90444
ITPK1	0.226254	10.0244	2.66633	0.0137093	0.312456	-2.90568
POLRMT	0.230881	10.2807	2.6651	0.0137473	0.312456	-2.90801
SUGP2	0.328711	8.99648	2.66481	0.0137564	0.312456	-2.90856
PGM2L1	-0.352219	10.1685	-2.66442	0.0137685	0.312456	-2.9093
CRISP2	0.421532	7.81008	2.66202	0.0138437	0.313613	-2.91387
PLSCR4	-0.293216	9.20781	-2.65901	0.0139383	0.314697	-2.91959
PLAG1	-0.271929	9.05053	-2.65821	0.0139636	0.314697	-2.92111
DHX34	0.345633	9.44221	2.65615	0.0140287	0.314697	-2.92502
SIAH1	0.918088	8.84655	2.65596	0.0140348	0.314697	-2.92538
REXO1	0.341647	9.67207	2.65507	0.014063	0.314697	-2.92707
FBXO27	0.258079	8.35562	2.65486	0.0140697	0.314697	-2.92746
GPR1	-0.211874	7.96	-2.65362	0.0141095	0.314697	-2.92983
MAGEH1	-0.24753	9.23662	-2.6525	0.0141452	0.314697	-2.93195
MARCH4	0.331869	11.0343	2.65111	0.0141897	0.314697	-2.93459
SLC25A26	-0.204038	8.50061	-2.65048	0.01421	0.314697	-2.93579
PRKCZ	-0.258959	8.0151	-2.65027	0.0142167	0.314697	-2.93619
PTGES2	0.274155	10.4418	2.64927	0.0142486	0.314697	-2.93807
PTPRR	-0.266956	9.58421	-2.64902	0.0142567	0.314697	-2.93854
MLLT11	-0.192066	9.7443	-2.64601	0.0143542	0.314697	-2.94426
KIZ	-0.252467	8.18317	-2.64582	0.0143604	0.314697	-2.94463
ATP11C	-0.243181	9.58189	-2.64574	0.0143629	0.314697	-2.94477
LINC00083	0.263169	7.58028	2.64534	0.0143759	0.314697	-2.94553
TBC1D3B	0.373925	8.96564	2.64515	0.0143821	0.314697	-2.94589
NCAM2	-0.241653	7.62964	-2.64431	0.0144094	0.314697	-2.94748
RHOU	-0.207209	8.2659	-2.64415	0.0144145	0.314697	-2.94778
ACLY	0.2792	12.7334	2.64409	0.0144166	0.314697	-2.9479
RFXANK	0.227354	9.1425	2.6438	0.0144259	0.314697	-2.94844
CLTB	0.155145	12.7587	2.6413	0.0145078	0.315604	-2.95319
GPER1	-0.328258	8.38582	-2.64104	0.0145161	0.315604	-2.95367
HIATL1	0.219015	9.7696	2.6378	0.0146229	0.317281	-2.95982
TEDDM1	0.249315	7.65454	2.63721	0.0146423	0.317281	-2.96092
SLC38A6	-0.246266	9.4461	-2.63507	0.0147131	0.31798	-2.96497
KMT2B	0.286276	10.0436	2.63476	0.0147236	0.31798	-2.96557
THAP7	0.196544	8.28555	2.63304	0.0147807	0.318156	-2.96882
FAM86HP	-0.145813	9.11949	-2.63232	0.0148048	0.318156	-2.97018
TMEM107	-0.245865	8.83778	-2.63061	0.014862	0.318156	-2.97341
REP15	0.189157	8.01731	2.63061	0.014862	0.318156	-2.97341
TBC1D14	0.176593	10.6573	2.63026	0.0148736	0.318156	-2.97407
ZNF589	0.285788	8.43286	2.6301	0.014879	0.318156	-2.97437
PDS5B	-0.216199	8.8662	-2.62814	0.0149449	0.318844	-2.97808
SCARNA21	-0.189998	7.71779	-2.62674	0.014992	0.318844	-2.98071
PFN2	-0.222926	10.5766	-2.62584	0.0150225	0.318844	-2.98242
THOP1	0.261236	10.5914	2.62561	0.0150302	0.318844	-2.98284
SMARCA4	0.164606	12.6247	2.62549	0.0150342	0.318844	-2.98307
MED25	0.225988	10.0103	2.62361	0.015098	0.319144	-2.98662
ZNF606	-0.213779	8.45102	-2.62305	0.0151173	0.319144	-2.98769
YPEL2	-0.297069	9.07893	-2.62206	0.0151511	0.319144	-2.98956
DYNC2LI1	-0.298004	9.04341	-2.61982	0.0152275	0.319144	-2.99377
LGALS3	-0.375349	10.9721	-2.61959	0.0152354	0.319144	-2.99421
EEF2	0.189375	13.7883	2.61958	0.0152359	0.319144	-2.99424
MANBA	-0.218226	9.58773	-2.61827	0.0152809	0.319144	-2.99671
LRRC8B	-0.20341	8.81984	-2.61815	0.0152849	0.319144	-2.99692
TMEM244	-0.204584	7.63854	-2.61739	0.015311	0.319144	-2.99836
RNF8	-0.213694	7.91389	-2.61666	0.0153362	0.319144	-2.99973
SOX4	-0.300565	11.1721	-2.6159	0.0153624	0.319144	-3.00116
PI4KAP1	0.242042	9.42359	2.6157	0.0153694	0.319144	-3.00155
HSD17B11	-1.24522	10.627	-2.61537	0.0153808	0.319144	-3.00216
WDFY3	-0.175051	8.56798	-2.6137	0.0154385	0.319144	-3.0053
CEP170B	0.176873	7.59531	2.6132	0.015456	0.319144	-3.00625
ITPRIPL2	0.24082	8.82007	2.61301	0.0154626	0.319144	-3.00661
CADM4	-0.214015	7.83867	-2.61238	0.0154845	0.319144	-3.0078
AIM1	-0.224862	9.11226	-2.61218	0.0154917	0.319144	-3.00818
ZNF17	-0.199845	9.27877	-2.61112	0.0155284	0.319392	-3.01016
ATXN7L3	0.272777	10.7944	2.60955	0.0155835	0.319745	-3.01313
DYX1C1	-0.221825	7.80608	-2.60698	0.0156737	0.319745	-3.01797
ZNF615	-0.212105	9.05729	-2.60686	0.0156781	0.319745	-3.0182
AKR1D1	0.16923	14.9285	2.60648	0.0156912	0.319745	-3.0189
OR2A42	0.504483	8.92749	2.60628	0.0156985	0.319745	-3.01928
FBRS	-0.646499	8.3712	-2.6052	0.0157367	0.319745	-3.02132
DLG3	-0.157026	8.44926	-2.60515	0.0157383	0.319745	-3.02141
PGPEP1	-0.184676	7.81053	-2.60502	0.015743	0.319745	-3.02166
MED22	0.260474	8.82705	2.60335	0.0158019	0.319771	-3.02479
ANGPTL2	-0.259509	10.0028	-2.60278	0.0158222	0.319771	-3.02586
DDX31	0.176935	9.51269	2.60237	0.015837	0.319771	-3.02664
GTSE1	0.206959	9.6198	2.60157	0.0158654	0.319771	-3.02814
CEMIP	-0.233765	7.48541	-2.59964	0.0159343	0.319771	-3.03177
ZFP42	0.272833	7.71951	2.5994	0.0159428	0.319771	-3.03222
C6orf136	0.202742	11.0388	2.59934	0.0159451	0.319771	-3.03234
TTC9C	-0.47698	9.62568	-2.59918	0.0159507	0.319771	-3.03263
MIER1	-0.171519	9.97768	-2.5975	0.016011	0.319771	-3.03579
SAFB2	0.235217	11.1954	2.59689	0.0160329	0.319771	-3.03693
CD27-AS1	-0.24237	9.38562	-2.59578	0.0160729	0.319771	-3.03902
ASPHD1	0.262709	8.16798	2.59568	0.0160764	0.319771	-3.0392
SPTBN5	0.194439	7.86595	2.59553	0.016082	0.319771	-3.03949
MAT2A	0.194612	13.6528	2.59489	0.0161048	0.319771	-3.04068
ANP32AP1	0.262783	9.82872	2.5942	0.01613	0.319771	-3.04199
KBTBD3	-0.257066	8.49319	-2.59281	0.0161801	0.319771	-3.04458
RPS15A	-0.166023	14.5847	-2.59224	0.016201	0.319771	-3.04566
XPO6	0.236164	10.6999	2.59218	0.0162033	0.319771	-3.04578
MYH3	0.267313	8.86616	2.59016	0.0162767	0.319771	-3.04956
SNORD89	-0.206606	8.87437	-2.58666	0.016405	0.319771	-3.05612
PCDH18	-0.230989	8.32362	-2.58515	0.0164604	0.319771	-3.05894
TUBA1C	0.162717	14.5418	2.58461	0.0164803	0.319771	-3.05995
MRPS34	0.265263	9.5555	2.58376	0.0165118	0.319771	-3.06156
GPBP1L1	-0.789373	9.32277	-2.58343	0.0165241	0.319771	-3.06218
AUTS2	0.393332	7.99759	2.58338	0.0165258	0.319771	-3.06226
EPN1	0.206881	13.1173	2.58314	0.0165347	0.319771	-3.06271
CCDC125	-0.212281	7.95069	-2.58305	0.016538	0.319771	-3.06288
NOA1	-0.146475	10.8036	-2.58296	0.0165415	0.319771	-3.06306
PKN2	-0.190215	9.30479	-2.58283	0.0165463	0.319771	-3.0633
DPY19L4	-0.199907	9.62958	-2.58208	0.016574	0.319771	-3.0647
CD55	-0.465428	9.86034	-2.58192	0.0165801	0.319771	-3.06501
TRMT44	0.209803	8.02479	2.58125	0.016605	0.319771	-3.06626
SAFB	0.314638	10.4017	2.58082	0.0166209	0.319771	-3.06706
LYRM5	-0.276778	9.27968	-2.58073	0.0166242	0.319771	-3.06723
EXOC3L1	-0.209078	7.72866	-2.58026	0.0166416	0.319771	-3.0681
ATG4D	0.213559	8.70059	2.57954	0.0166684	0.319771	-3.06945
CC2D1A	0.222341	8.73254	2.57914	0.0166834	0.319771	-3.0702
TCHP	0.209904	9.74173	2.57719	0.0167566	0.319771	-3.07386
HOTTIP	-0.183517	7.86465	-2.57593	0.0168036	0.319771	-3.0762
ZNF649	-0.19427	7.73718	-2.57564	0.0168147	0.319771	-3.07676
ZNF609	0.239168	8.80921	2.5756	0.0168163	0.319771	-3.07683
CNIH3	-0.355452	9.25823	-2.57536	0.0168252	0.319771	-3.07727
COL1A1	0.218135	8.18	2.57397	0.0168775	0.319771	-3.07987
ZNF502	-0.192505	8.63604	-2.57303	0.0169132	0.319771	-3.08164
SLC25A29	0.295445	9.01513	2.57288	0.0169187	0.319771	-3.08191
KLRC3	-0.219047	7.84305	-2.57128	0.0169792	0.319771	-3.08489
FRMPD3	0.30311	7.7814	2.57052	0.0170082	0.319771	-3.08632
PCDHB12	-0.185035	8.28751	-2.57019	0.017021	0.319771	-3.08694
UTP14A	0.414613	10.6753	2.57	0.0170279	0.319771	-3.08729
DNAJB14	-0.225532	9.76918	-2.56993	0.0170306	0.319771	-3.08742
FAM102B	-0.262678	9.49501	-2.5698	0.0170357	0.319771	-3.08767
GTPBP8	-0.207781	9.66746	-2.56979	0.0170361	0.319771	-3.08769
RPL26	-0.229806	13.3719	-2.56914	0.0170608	0.319771	-3.0889
ATP8A1	-0.152761	7.63415	-2.56784	0.0171104	0.319771	-3.09132
PIM1	-0.28855	10.3389	-2.56769	0.0171161	0.319771	-3.0916
ANKDD1A	-0.265379	8.79805	-2.56702	0.0171419	0.319771	-3.09286
CFAP69	-0.22429	8.26211	-2.56522	0.017211	0.319771	-3.09622
MAP9	-0.188644	7.75108	-2.56513	0.0172145	0.319771	-3.09639
TPD52L1	-0.224999	8.10579	-2.5648	0.0172269	0.319771	-3.097
CCL26	-0.505073	9.46713	-2.56435	0.0172444	0.319771	-3.09784
CD58	-0.332145	10.7023	-2.56417	0.0172513	0.319771	-3.09817
MORF4L1	-0.246852	12.7358	-2.56263	0.0173106	0.319771	-3.10104
MZF1	0.27149	11.0707	2.56174	0.0173453	0.319771	-3.10272
ITPK1-AS1	0.218925	13.8533	2.56169	0.0173469	0.319771	-3.10279
MKI67	0.23418	8.81446	2.5607	0.0173853	0.319771	-3.10464
ARHGAP19	-0.211541	9.54728	-2.56029	0.0174013	0.319771	-3.10541
TADA1	-0.240012	8.99959	-2.55928	0.0174405	0.319771	-3.10729
KCTD9	-0.26527	9.89442	-2.558	0.0174906	0.319771	-3.10968
SKIL	-0.248956	8.17893	-2.55772	0.0175015	0.319771	-3.11021
IVD	0.222751	9.6897	2.55685	0.0175356	0.319771	-3.11183
DGCR11	0.184389	8.76475	2.55618	0.0175619	0.319771	-3.11308
CUTC	-0.210445	9.23748	-2.55518	0.0176008	0.319771	-3.11493
SRM	0.299907	10.702	2.55446	0.0176294	0.319771	-3.11628
HIST1H4B	-0.351825	8.45976	-2.55405	0.0176453	0.319771	-3.11704
CES4A	0.241264	7.62577	2.55254	0.0177049	0.319771	-3.11985
ZNF543	-0.21652	7.90592	-2.55085	0.0177716	0.319771	-3.12299
KCNMB4	-0.190349	8.08105	-2.55027	0.0177945	0.319771	-3.12407
TMEM126A	-0.228348	11.5623	-2.54987	0.0178105	0.319771	-3.12482
GTF3C1	0.250359	9.56262	2.54949	0.0178255	0.319771	-3.12552
SAP30BP	0.288228	8.96843	2.5481	0.017881	0.319771	-3.12812
TMEM144	-0.213308	8.3588	-2.54756	0.0179024	0.319771	-3.12912
ZNF558	-0.238691	9.66794	-2.54746	0.0179064	0.319771	-3.1293
SSSCA1	0.217836	8.60299	2.54692	0.0179278	0.319771	-3.1303
DENND3	0.255495	8.7008	2.54681	0.0179325	0.319771	-3.13052
ZNF214	-0.194012	7.79036	-2.54667	0.0179378	0.319771	-3.13077
PAX8	0.198021	8.94975	2.54598	0.0179656	0.319771	-3.13206
MIR877	0.610569	8.6097	2.545	0.018005	0.319771	-3.13388
STK17B	-0.265156	8.92046	-2.54455	0.0180227	0.319771	-3.1347
PARM1	-0.214981	7.80743	-2.54425	0.0180351	0.319771	-3.13528
ARMC5	0.300361	8.7359	2.5437	0.0180571	0.319771	-3.1363
C1orf35	0.193079	9.77199	2.54317	0.0180785	0.319771	-3.13728
C1orf189	0.235818	7.90434	2.54309	0.0180817	0.319771	-3.13743
KLF9	-0.316655	9.96908	-2.54305	0.0180831	0.319771	-3.1375
WWP1	-0.218496	10.6433	-2.54296	0.0180867	0.319771	-3.13766
SELENBP1	0.165927	8.08087	2.54291	0.0180886	0.319771	-3.13775
EYA3	-0.171138	7.98295	-2.54097	0.0181671	0.320346	-3.14137
RNF20	-0.174882	10.8758	-2.54016	0.0182	0.320346	-3.14287
UBE2Q1	0.184682	9.60689	2.5392	0.0182386	0.320346	-3.14464
OR2T11	0.288619	7.74691	2.5391	0.0182426	0.320346	-3.14483
RC3H2	-0.225448	10.0739	-2.53863	0.0182617	0.320346	-3.1457
ATP2A2	0.285717	12.0476	2.53844	0.0182695	0.320346	-3.14605
PFDN5	-0.219796	13.43	-2.53717	0.0183211	0.320684	-3.14841
LMBRD1	-0.190476	11.719	-2.53622	0.0183599	0.320684	-3.15017
TCP11L2	-0.225641	7.79748	-2.53615	0.018363	0.320684	-3.15031
PHAX	0.313808	9.24515	2.53439	0.0184349	0.321507	-3.15357
LOC728819	-0.166931	8.37469	-2.53325	0.0184815	0.321886	-3.15568
IGSF11	0.218573	7.95923	2.53114	0.0185683	0.322893	-3.15959
XCR1	0.40634	8.22008	2.53063	0.0185898	0.322893	-3.16055
SIRT7	0.24017	9.1092	2.52964	0.0186305	0.322893	-3.16238
C14orf28	-0.239059	8.82593	-2.52907	0.0186541	0.322893	-3.16343
ADIPOR2	0.164368	11.2483	2.52883	0.0186639	0.322893	-3.16387
ESRRA	0.220538	9.77401	2.52814	0.0186926	0.322958	-3.16515
SLC5A3	-0.346635	8.49606	-2.52673	0.0187512	0.323327	-3.16776
HERC2P8	0.284162	9.00628	2.52643	0.0187639	0.323327	-3.16832
ARL16	-2.05463	10.8343	-2.52538	0.0188076	0.323332	-3.17027
TMEM14C	-0.185114	13.2406	-2.525	0.0188234	0.323332	-3.17096
HLA-DRA	-0.3379	9.64208	-2.52384	0.0188719	0.323332	-3.17311
SCAMP3	0.299107	8.63215	2.52267	0.0189211	0.323332	-3.17528
DNHD1	0.290632	8.71188	2.5213	0.0189787	0.323332	-3.17782
STX6	-0.157088	10.5123	-2.52121	0.0189827	0.323332	-3.17799
MRPL30	0.557319	9.41109	2.52113	0.0189857	0.323332	-3.17812
DEPDC7	-0.192277	8.06425	-2.52038	0.0190173	0.323332	-3.17951
ARNT2	-0.246718	8.16674	-2.51986	0.0190394	0.323332	-3.18048
WRAP73	0.172129	10.5021	2.51917	0.0190686	0.323332	-3.18175
BLVRA	-0.236416	11.5186	-2.51907	0.0190727	0.323332	-3.18193
ZNF254	-0.256816	8.1792	-2.51892	0.0190793	0.323332	-3.18222
RUVBL2	0.206893	11.0848	2.5187	0.0190885	0.323332	-3.18262
ACTR6	-0.219856	10.9125	-2.51804	0.0191165	0.323384	-3.18385
ACACA	0.231919	10.6357	2.51552	0.0192236	0.324771	-3.1885
LEO1	0.835097	8.859	2.51417	0.0192811	0.325319	-3.19099
CADM1	-0.247329	7.5989	-2.51236	0.0193585	0.325718	-3.19433
CNIH4	-0.269644	12.5189	-2.51234	0.0193595	0.325718	-3.19437
IFNGR2	-0.185527	12.3331	-2.51186	0.0193802	0.325718	-3.19526
LIN9	-0.30202	9.0128	-2.51077	0.019427	0.326082	-3.19727
ANKRD29	-0.299335	9.58163	-2.50929	0.0194909	0.326507	-3.20001
SCARNA10	0.255953	8.91503	2.50901	0.0195027	0.326507	-3.20051
CAD	0.291507	10.272	2.50748	0.0195689	0.327193	-3.20333
C10orf35	-0.250892	8.80415	-2.50671	0.0196024	0.32733	-3.20476
C22orf29	0.292314	8.82521	2.50541	0.019659	0.327852	-3.20716
MCF2L2	0.18089	7.77078	2.5042	0.0197119	0.327963	-3.20939
NAV2	0.664829	10.0092	2.50319	0.0197558	0.327963	-3.21125
FOXM1	0.423708	9.65612	2.50308	0.0197607	0.327963	-3.21146
MAP1S	0.201723	10.9809	2.50294	0.0197669	0.327963	-3.21171
P2RX6	0.188017	7.60232	2.50199	0.0198081	0.328227	-3.21345
RNF122	-0.16981	7.7923	-2.50076	0.0198621	0.328252	-3.21572
SMC3	-0.224362	8.32036	-2.50005	0.0198937	0.328252	-3.21704
LTA4H	-0.140518	12.8319	-2.49937	0.0199233	0.328252	-3.21828
ALPK1	-0.208833	8.21329	-2.49756	0.0200032	0.328252	-3.22161
SRGAP3	0.298336	7.45324	2.49738	0.0200112	0.328252	-3.22194
CCT6B	-0.364283	8.42486	-2.49736	0.0200123	0.328252	-3.22199
STAT4	-0.197446	7.80646	-2.49705	0.0200258	0.328252	-3.22255
ZNF484	-0.176081	8.3015	-2.49702	0.0200272	0.328252	-3.22261
COMMD6	-0.246622	12.8253	-2.49641	0.0200541	0.328252	-3.22372
CECR5	0.284214	8.58335	2.4959	0.020077	0.328252	-3.22467
MCRS1	0.190736	8.72155	2.49533	0.020102	0.328252	-3.22571
IL32	-0.445048	9.42311	-2.49456	0.0201362	0.328252	-3.22712
FOXRED2	0.272488	9.21512	2.49341	0.0201876	0.328252	-3.22925
RSPH3	-0.154571	8.40583	-2.4927	0.0202192	0.328252	-3.23055
PFKM	0.162416	10.4214	2.49214	0.0202443	0.328252	-3.23158
INPP4A	0.15182	8.00139	2.49138	0.0202784	0.328252	-3.23298
CREBRF	-0.252899	9.99794	-2.49134	0.0202802	0.328252	-3.23305
MOCS3	0.165178	7.74969	2.49114	0.020289	0.328252	-3.23341
PPP1R16A	0.219277	10.5251	2.4911	0.0202909	0.328252	-3.23349
KLHDC9	-0.213496	8.25151	-2.48892	0.0203886	0.328536	-3.23749
TTC27	-0.205991	10.7315	-2.48861	0.0204027	0.328536	-3.23807
PRKRA	-0.234944	10.4749	-2.48845	0.0204099	0.328536	-3.23836
ZNF521	-0.289565	8.89497	-2.48842	0.0204113	0.328536	-3.23842
GSTM1	-0.260922	8.69498	-2.48789	0.0204352	0.328536	-3.23939
ZNF391	0.290429	7.85862	2.48661	0.020493	0.328633	-3.24174
CPQ	-0.240028	8.36519	-2.4865	0.0204978	0.328633	-3.24194
C7orf26	0.196302	10.7777	2.48595	0.020523	0.328633	-3.24296
DPP3	-0.262102	9.81247	-2.48551	0.0205427	0.328633	-3.24376
NRG1	-0.246958	9.41945	-2.4832	0.0206478	0.32967	-3.248
APOBEC3D	-0.182029	8.17202	-2.4828	0.0206658	0.32967	-3.24872
CLDN9	0.176562	7.73583	2.48181	0.0207113	0.32967	-3.25055
ADAMTS6	0.329877	10.9736	2.48103	0.020747	0.32967	-3.25199
KLHL18	0.180894	9.07395	2.4805	0.0207712	0.32967	-3.25295
EPHA10	-0.19066	8.35527	-2.48039	0.0207761	0.32967	-3.25315
USB1	0.219599	11.1967	2.47854	0.020861	0.32967	-3.25654
UBTF	0.212866	9.21038	2.47815	0.0208792	0.32967	-3.25727
HACL1	-0.206749	10.9969	-2.47803	0.0208844	0.32967	-3.25747
ALMS1P	0.221163	7.63287	2.47755	0.0209066	0.32967	-3.25836
LMNB2	0.247041	12.5224	2.47712	0.0209265	0.32967	-3.25915
MBL1P	0.246344	7.66483	2.47597	0.0209796	0.32967	-3.26126
NSUN5	0.241112	9.49424	2.47589	0.0209831	0.32967	-3.2614
POLD1	0.299833	9.92188	2.47569	0.0209924	0.32967	-3.26176
RAB11B	0.265583	8.53405	2.47475	0.0210361	0.32967	-3.26349
KBTBD2	-0.166756	11.9795	-2.47453	0.0210461	0.32967	-3.26389
LOC613037	0.329888	13.5786	2.47434	0.0210547	0.32967	-3.26423
METTL15	-0.159184	9.35459	-2.47411	0.0210655	0.32967	-3.26465
ABCC3	1.06757	8.68848	2.47288	0.0211228	0.329714	-3.26691
SFT2D3	-0.13766	7.80735	-2.47286	0.0211237	0.329714	-3.26695
ARL4A	-0.232566	9.45531	-2.47241	0.0211447	0.329714	-3.26777
LARP7	-0.63159	9.97806	-2.47176	0.0211748	0.329787	-3.26895
GSTO2	-0.266602	8.40972	-2.46993	0.0212604	0.329867	-3.27231
SNORD34	-0.259221	7.97589	-2.46968	0.0212719	0.329867	-3.27276
ZNF860	0.267588	9.80596	2.4696	0.0212759	0.329867	-3.27291
MYO1C	0.254869	9.32821	2.46947	0.0212817	0.329867	-3.27314
LIPG	-0.276002	9.0828	-2.46807	0.0213477	0.330493	-3.27571
LIFR	-0.219443	7.83547	-2.46725	0.0213864	0.330698	-3.27722
TERF1	-0.198236	8.57526	-2.46611	0.0214398	0.330756	-3.27929
NUP62	1.61741	12.2505	2.46592	0.0214486	0.330756	-3.27963
INPP5J	0.320283	7.56838	2.4653	0.0214781	0.330756	-3.28077
NR2F2	0.308858	8.52462	2.46489	0.0214975	0.330756	-3.28152
PRRG4	0.266273	9.55455	2.46446	0.0215178	0.330756	-3.28231
UBAP2	0.182804	10.0569	2.46298	0.0215879	0.33099	-3.28501
ZNF281	-0.250146	10.3453	-2.46166	0.0216505	0.33099	-3.28742
DSP	-0.135838	7.90584	-2.46005	0.0217276	0.33099	-3.29037
SLC36A4	-0.245189	9.63258	-2.45989	0.0217353	0.33099	-3.29066
OXSM	0.197119	9.2132	2.45899	0.0217783	0.33099	-3.2923
LRIG1	-0.559209	9.92753	-2.4588	0.0217871	0.33099	-3.29264
TRIM28	0.219272	11.1479	2.45863	0.0217951	0.33099	-3.29295
SCAMP2	0.24223	8.92227	2.45798	0.0218263	0.33099	-3.29413
HLA-G	-0.315103	10.433	-2.45711	0.0218682	0.33099	-3.29573
KCTD13	0.261436	9.88283	2.45618	0.0219129	0.33099	-3.29742
HIBADH	-0.203418	11.4266	-2.45593	0.0219248	0.33099	-3.29787
OR2AG2	0.357082	7.61381	2.45443	0.0219971	0.33099	-3.3006
WWC3	0.242286	9.98123	2.45443	0.0219973	0.33099	-3.30061
IFFO1	0.282759	7.61646	2.45276	0.022078	0.33099	-3.30365
PNPLA2	0.270035	10.585	2.45263	0.0220846	0.33099	-3.3039
LGALS9	-0.188497	7.95825	-2.45149	0.0221398	0.33099	-3.30598
SNORD46	-0.271724	8.4081	-2.4505	0.0221877	0.33099	-3.30777
GLTSCR1	0.275939	9.26467	2.45047	0.0221892	0.33099	-3.30783
NT5DC1	-0.328021	9.45539	-2.44971	0.0222262	0.33099	-3.30921
JKAMP	-0.26326	11.0387	-2.44912	0.0222551	0.33099	-3.31029
STK3	-0.251516	10.0269	-2.44847	0.0222871	0.33099	-3.31148
CETN1	0.250365	7.70505	2.44825	0.0222975	0.33099	-3.31187
PRRT1	0.281572	8.55975	2.44825	0.0222978	0.33099	-3.31188
TRIML1	0.200939	7.92751	2.44763	0.0223281	0.33099	-3.31301
ZNF395	-0.218144	11.1942	-2.44691	0.0223635	0.33099	-3.31432
KDM5C	0.250243	8.46431	2.44622	0.0223969	0.33099	-3.31556
DNASE2	-0.167148	11.3118	-2.44587	0.0224144	0.33099	-3.31621
ANO3	-0.178607	7.63216	-2.44543	0.022436	0.33099	-3.31701
SLC25A12	-0.211734	8.89268	-2.44529	0.0224429	0.33099	-3.31726
ELP2	-0.146367	10.7427	-2.44525	0.0224447	0.33099	-3.31733
ASB6	0.208344	8.8091	2.44398	0.0225075	0.33099	-3.31965
CARKD	0.18502	10.4317	2.44387	0.0225127	0.33099	-3.31984
PKDREJ	0.221959	7.5791	2.4437	0.0225214	0.33099	-3.32016
CCDC50	-0.185247	8.26758	-2.44349	0.0225317	0.33099	-3.32054
IL1RAP	-0.336037	8.66655	-2.44327	0.0225425	0.33099	-3.32094
CYGB	0.189269	7.80734	2.44311	0.0225502	0.33099	-3.32122
BTRC	0.19088	8.39921	2.44286	0.0225628	0.33099	-3.32168
CCNO	-0.202343	7.87237	-2.44142	0.0226338	0.33099	-3.32429
ZNF222	0.186205	7.99985	2.44083	0.0226633	0.33099	-3.32537
ZNF213	0.154141	8.11058	2.44063	0.0226734	0.33099	-3.32574
APBB1IP	0.217679	11.3486	2.43948	0.0227304	0.33099	-3.32782
DUSP19	0.218381	12.8621	2.43899	0.0227547	0.33099	-3.32871
TOX4	-0.151505	9.12682	-2.43742	0.022833	0.33099	-3.33156
RPL28	0.220115	9.4887	2.43429	0.0229902	0.33099	-3.33725
FAM127A	0.210709	12.208	2.43317	0.0230464	0.33099	-3.33927
CCDC88A	-0.195259	8.57938	-2.43309	0.0230507	0.33099	-3.33943
ARHGEF3	-0.220435	9.98371	-2.43301	0.0230547	0.33099	-3.33957
UEVLD	-0.247124	8.83208	-2.43247	0.0230821	0.33099	-3.34056
SCRN3	-0.137697	8.12	-2.432	0.0231058	0.33099	-3.34141
SNORD13	-0.628696	12.1509	-2.43187	0.023112	0.33099	-3.34163
JAK2	-0.213452	8.11175	-2.43173	0.0231193	0.33099	-3.34189
NUCB2	-0.24229	10.3765	-2.43071	0.023171	0.33099	-3.34374
RPL21	-0.181372	12.6926	-2.43053	0.0231802	0.33099	-3.34407
PLLP	-0.283911	8.48906	-2.42959	0.0232277	0.33099	-3.34577
BBS12	-0.216917	8.42321	-2.42922	0.0232466	0.33099	-3.34645
FNTB	0.21093	10.013	2.42874	0.0232712	0.33099	-3.34732
ACTR1A	0.214148	10.9465	2.42872	0.0232722	0.33099	-3.34736
TANC1	-0.235543	8.84489	-2.42869	0.0232737	0.33099	-3.34741
ZXDB	-0.198567	8.66538	-2.42843	0.023287	0.33099	-3.34788
G0S2	0.307424	10.7387	2.42799	0.0233091	0.33099	-3.34867
SMARCC2	-0.425849	8.84509	-2.42769	0.0233243	0.33099	-3.34921
MIR503	0.250757	7.77399	2.42735	0.0233419	0.33099	-3.34983
EPHB2	0.172175	9.63429	2.42655	0.0233827	0.33099	-3.35128
SOX10	0.257912	7.40746	2.42648	0.0233861	0.33099	-3.3514
FAM13A	-0.291047	9.38354	-2.42619	0.0234011	0.33099	-3.35194
TRAF2	0.260372	8.73331	2.42605	0.0234083	0.33099	-3.35219
ARG2	-0.185879	8.18274	-2.42466	0.0234794	0.33099	-3.3547
TSC22D3	-0.591229	10.7828	-2.42417	0.0235046	0.33099	-3.35559
ZNF625	-0.140509	7.92868	-2.42325	0.0235518	0.33099	-3.35726
QRFPR	0.243801	12.6047	2.42319	0.0235551	0.33099	-3.35737
SLC39A10	-0.224249	9.4593	-2.42261	0.0235847	0.33099	-3.35841
C15orf52	0.237398	13.1428	2.42215	0.0236085	0.33099	-3.35925
TOMM34	0.189699	13.2608	2.42195	0.0236186	0.33099	-3.3596
RNF217	-0.162689	8.74375	-2.42186	0.0236232	0.33099	-3.35976
EIF4EBP3	0.216565	8.6271	2.42072	0.0236821	0.33099	-3.36183
SNORD21	-0.26919	7.93884	-2.42037	0.0237006	0.33099	-3.36247
TEX264	0.22174	10.3782	2.42013	0.0237129	0.33099	-3.3629
OSBPL2	-0.193101	8.30438	-2.4201	0.0237145	0.33099	-3.36296
RPP40	-0.165617	11.5205	-2.41902	0.0237706	0.33099	-3.36492
CEACAM1	-0.259261	7.64812	-2.41896	0.0237734	0.33099	-3.36501
RAP1B	-0.287964	8.85395	-2.41895	0.0237741	0.33099	-3.36504
ART4	0.338784	7.56438	2.41865	0.0237894	0.33099	-3.36557
ARHGAP9	0.34089	8.78907	2.41841	0.0238018	0.33099	-3.36601
TRIM58	0.338618	7.7321	2.41738	0.0238554	0.33099	-3.36787
PPARD	0.241323	9.33079	2.41704	0.0238732	0.33099	-3.36849
OR1L8	0.320912	7.78497	2.41687	0.0238823	0.33099	-3.3688
IDS	-0.303248	8.72383	-2.41671	0.0238905	0.33099	-3.36909
SGTA	0.271422	9.93135	2.41663	0.0238949	0.33099	-3.36924
FBXO10	0.268702	8.181	2.41646	0.0239037	0.33099	-3.36954
TMEM194A	0.167213	9.79965	2.41638	0.0239076	0.33099	-3.36968
EIF3E	-0.140105	14.2853	-2.41551	0.023953	0.33099	-3.37125
MARVELD2	-0.210427	8.01744	-2.41488	0.0239862	0.33099	-3.3724
FCGR3B	0.277334	8.869	2.41472	0.0239947	0.33099	-3.37269
ZNF841	-0.178877	8.78513	-2.41471	0.0239952	0.33099	-3.37271
ORC2	-0.156327	9.68182	-2.41465	0.0239981	0.33099	-3.37281
DPP9	0.283405	12.3938	2.41445	0.0240085	0.33099	-3.37317
GIN1	-0.192523	8.25191	-2.41441	0.0240107	0.33099	-3.37324
APRT	0.521494	10.7069	2.41237	0.0241176	0.332111	-3.37692
COBL	0.192352	7.73006	2.4115	0.0241638	0.332393	-3.37851
MR1	-0.223835	8.20554	-2.40957	0.0242655	0.333187	-3.38199
TBL2	0.147442	9.89497	2.40863	0.0243153	0.333187	-3.38368
TADA2B	0.166032	9.10687	2.40802	0.0243477	0.333187	-3.38478
SPCS2	-0.217962	7.89806	-2.40764	0.0243679	0.333187	-3.38547
IFI44	-0.239373	11.4936	-2.40753	0.0243738	0.333187	-3.38567
COPG2	-0.204409	10.1921	-2.4063	0.0244387	0.333187	-3.38787
RWDD2B	0.210325	8.49011	2.40623	0.0244425	0.333187	-3.388
KDM2B	0.194977	8.24722	2.40608	0.0244507	0.333187	-3.38828
LYRM1	-0.180581	10.6613	-2.40604	0.0244529	0.333187	-3.38835
GSTM3	-0.239251	8.95835	-2.40528	0.0244934	0.333223	-3.38972
KLK10	0.161914	7.7713	2.40502	0.024507	0.333223	-3.39018
VAMP1	0.194685	8.87906	2.40399	0.0245624	0.333323	-3.39205
ZNF701	-0.259854	8.83491	-2.4037	0.0245775	0.333323	-3.39256
MAZ	0.250828	8.85051	2.40284	0.0246237	0.333323	-3.39412
ENO1	0.137874	15.1224	2.4019	0.0246742	0.333323	-3.39581
DYM	-0.151684	9.8041	-2.401	0.0247225	0.333323	-3.39743
SYNM	-0.219421	10.1959	-2.39912	0.0248237	0.333323	-3.40081
SMARCC1	-0.177745	11.7553	-2.399	0.0248302	0.333323	-3.40103
SOGA1	-0.60737	8.53103	-2.39897	0.0248319	0.333323	-3.40108
PRKCSH	0.633665	9.7151	2.39743	0.0249152	0.333323	-3.40385
TRAPPC2B	-0.283577	10.1248	-2.39707	0.0249347	0.333323	-3.4045
CNN3	-0.163145	13.2508	-2.3966	0.0249603	0.333323	-3.40535
PAGE5	-0.24486	13.2004	-2.39491	0.0250525	0.333323	-3.4084
RNASEH2C	0.213998	9.57815	2.39392	0.0251064	0.333323	-3.41018
IFT88	-0.155515	8.66192	-2.39349	0.0251295	0.333323	-3.41094
BRPF1	0.183992	9.65153	2.39165	0.0252301	0.333323	-3.41424
HOOK2	0.227383	9.62108	2.39099	0.0252666	0.333323	-3.41544
ASS1	-0.160746	9.21978	-2.39072	0.0252816	0.333323	-3.41593
DDX49	0.193569	8.64894	2.3906	0.025288	0.333323	-3.41614
CCDC103	-0.150782	7.81433	-2.39047	0.0252952	0.333323	-3.41638
ICMT	0.205177	10.6964	2.39046	0.0252956	0.333323	-3.41639
ZNF837	0.286116	8.40606	2.39019	0.0253104	0.333323	-3.41687
GPRC5C	0.307126	7.56511	2.39013	0.0253141	0.333323	-3.41699
LY96	-0.373818	10.4763	-2.38962	0.0253419	0.333323	-3.4179
HELLS	-0.270018	9.61978	-2.3896	0.0253432	0.333323	-3.41794
LEPROTL1	-0.191001	10.6038	-2.38956	0.0253452	0.333323	-3.41801
IAH1	-0.228711	11.121	-2.3895	0.0253486	0.333323	-3.41812
TOR4A	0.212662	10.6689	2.38939	0.0253546	0.333323	-3.41832
KCND1	0.239469	8.04164	2.38917	0.0253669	0.333323	-3.41872
ASNSD1	-0.124847	11.6803	-2.38905	0.0253734	0.333323	-3.41893
CHERP	0.18447	10.115	2.38887	0.0253829	0.333323	-3.41924
PDGFRB	-0.365613	8.42062	-2.38884	0.025385	0.333323	-3.4193
U2AF2	0.31795	8.9403	2.38879	0.0253877	0.333323	-3.41939
ZNF629	0.198031	7.82333	2.38831	0.0254139	0.333323	-3.42025
DGCR2	0.238478	9.18697	2.38811	0.0254253	0.333323	-3.42062
NUP43	-0.175881	8.14697	-2.38751	0.0254584	0.333323	-3.42169
ICE2	-0.237228	8.54431	-2.38477	0.0256103	0.333323	-3.42661
HLA-F-AS1	-0.204249	7.60904	-2.38416	0.0256439	0.333323	-3.42769
FAM162A	-0.324651	9.40914	-2.38334	0.0256897	0.333323	-3.42917
ZC3H4	0.179095	10.3316	2.38277	0.0257213	0.333323	-3.43019
GPAA1	0.297438	10.6594	2.38239	0.0257428	0.333323	-3.43088
ZNF839	0.932379	10.1576	2.3823	0.0257478	0.333323	-3.43104
ATIC	0.140791	12.6286	2.38195	0.0257675	0.333323	-3.43167
ZSCAN16	-0.227834	9.39101	-2.38178	0.0257766	0.333323	-3.43196
LRRC26	0.264839	9.29584	2.3815	0.0257924	0.333323	-3.43247
NGEF	-0.225125	8.18865	-2.38145	0.025795	0.333323	-3.43255
SNORD15B	-0.367928	8.30687	-2.38065	0.0258402	0.333323	-3.434
MLF2	0.13618	11.169	2.38007	0.0258728	0.333323	-3.43504
GAD1	-0.187326	9.69174	-2.38002	0.0258753	0.333323	-3.43512
BPGM	-0.250736	9.28719	-2.37969	0.0258938	0.333323	-3.43571
DVL1	0.23691	8.92768	2.37874	0.025947	0.333323	-3.43741
SPO11	0.171307	8.1167	2.37831	0.0259713	0.333323	-3.43818
ZNF682	-0.158851	8.20903	-2.37806	0.0259855	0.333323	-3.43863
P2RY11	0.27778	9.76125	2.37797	0.0259908	0.333323	-3.4388
PLEKHB1	-0.311416	8.41575	-2.3752	0.0261469	0.333323	-3.44375
GPR3	0.194279	8.60861	2.37472	0.0261744	0.333323	-3.44461
SLC7A7	-0.170486	8.41344	-2.37464	0.0261786	0.333323	-3.44475
SAMD8	-0.205926	7.88288	-2.37449	0.0261877	0.333323	-3.44503
SPPL3	0.225576	8.71736	2.37438	0.0261936	0.333323	-3.44522
CLSTN2	0.319928	7.49877	2.37331	0.0262542	0.333323	-3.44713
CACNA2D4	-0.246238	7.9154	-2.37299	0.0262729	0.333323	-3.44772
MASTL	0.470234	9.67821	2.37294	0.0262752	0.333323	-3.44779
BDP1	-0.185053	8.50942	-2.37287	0.0262793	0.333323	-3.44792
RNY1	-0.425676	9.53675	-2.372	0.0263289	0.333323	-3.44948
THAP4	0.150951	7.82533	2.37079	0.0263979	0.333323	-3.45164
SHKBP1	0.190982	9.29831	2.37052	0.0264132	0.333323	-3.45212
SPATA13	-0.149313	8.11338	-2.36948	0.0264732	0.333323	-3.45399
RUNX1	0.254447	10.5376	2.36911	0.0264943	0.333323	-3.45465
WDR41	-0.192354	10.447	-2.3681	0.0265525	0.333323	-3.45646
DAB2	-0.215715	10.8865	-2.36777	0.0265713	0.333323	-3.45704
SYS1	-0.159184	10.4935	-2.36766	0.0265777	0.333323	-3.45725
TIMM9	-0.227066	11.0685	-2.36744	0.0265903	0.333323	-3.45763
SNORA12	-0.330867	8.31553	-2.3674	0.0265926	0.333323	-3.45771
SPINK1	-0.24284	7.7916	-2.36716	0.0266061	0.333323	-3.45812
CYP2R1	-0.178301	9.83786	-2.36574	0.0266882	0.333323	-3.46067
ARL17A	-0.137279	8.28718	-2.36573	0.026689	0.333323	-3.46069
ABHD17B	-0.22661	8.91694	-2.36487	0.0267386	0.333323	-3.46223
LIG1	0.21264	10.6863	2.36455	0.0267567	0.333323	-3.46278
C4orf29	-0.192713	8.79479	-2.36395	0.0267917	0.333323	-3.46386
ZNF627	-0.199352	9.52595	-2.36369	0.0268067	0.333323	-3.46433
PFAS	0.178108	10.6059	2.36362	0.0268105	0.333323	-3.46444
RABL6	0.274692	9.59312	2.36298	0.0268478	0.333323	-3.46559
MGST2	-0.145039	11.7004	-2.36247	0.0268774	0.333323	-3.4665
COQ3	-0.172735	10.2711	-2.36237	0.0268834	0.333323	-3.46668
FRA10AC1	0.196027	7.9871	2.36231	0.0268867	0.333323	-3.46679
SLC2A14	-0.339789	8.50887	-2.36182	0.0269153	0.333323	-3.46766
ATE1	-0.188396	8.52684	-2.36162	0.0269267	0.333323	-3.46801
OR2A20P	0.589468	8.91365	2.36131	0.0269452	0.333323	-3.46858
ALKBH3	-0.183883	10.544	-2.36127	0.0269473	0.333323	-3.46864
SUV39H1	0.187356	10.7423	2.36118	0.0269526	0.333323	-3.46881
PARS2	-0.162054	8.62759	-2.36058	0.0269874	0.333323	-3.46987
DDX20	-0.219256	7.89269	-2.36021	0.0270092	0.333323	-3.47054
RHOG	0.184008	11.7941	2.35935	0.0270596	0.333323	-3.47208
SNORA45A	-0.164633	8.13989	-2.35884	0.0270892	0.333323	-3.47298
GOLGA7	-0.180544	11.8309	-2.35824	0.0271245	0.333323	-3.47405
NDUFA4	-0.202693	13.4466	-2.35746	0.0271701	0.333323	-3.47544
EXD3	-0.189279	7.72811	-2.35746	0.0271702	0.333323	-3.47544
TLR5	-0.364822	8.83597	-2.35684	0.0272063	0.333323	-3.47654
ALDH2	-0.230729	9.71978	-2.35607	0.0272516	0.333323	-3.47791
LOC100128288	0.26065	12.6273	2.35593	0.0272598	0.333323	-3.47816
TMEM175	0.175894	9.8683	2.35581	0.0272671	0.333323	-3.47838
CHAF1A	0.209744	8.87367	2.35535	0.0272944	0.333323	-3.47921
SMU1	0.152501	10.6098	2.35489	0.0273212	0.333323	-3.48002
ATP5D	1.29086	11.5384	2.35486	0.0273232	0.333323	-3.48008
SCG2	-0.239271	8.29171	-2.3545	0.0273441	0.333323	-3.48071
WDR5B	-0.141128	7.95232	-2.35438	0.0273515	0.333323	-3.48093
VN1R2	0.496649	8.23472	2.35436	0.0273523	0.333323	-3.48095
KHDC1	-0.195677	9.45874	-2.35332	0.0274142	0.333323	-3.48282
ZSCAN29	-0.210036	8.15278	-2.35272	0.0274498	0.333323	-3.48389
GIMAP4	0.229482	7.72065	2.35261	0.0274559	0.333323	-3.48407
ARHGDIA	0.262301	12.9345	2.35241	0.0274681	0.333323	-3.48444
GRIP2	-0.185534	7.81423	-2.35239	0.0274694	0.333323	-3.48448
SLC35F6	0.188621	8.75245	2.35172	0.0275087	0.333323	-3.48566
ADH5	-0.189898	8.95623	-2.35121	0.0275391	0.333323	-3.48657
SNORD32B	-0.223371	7.54146	-2.35099	0.0275522	0.333323	-3.48696
JPH2	0.214679	8.84356	2.35087	0.0275593	0.333323	-3.48717
ASB13	0.199374	8.89091	2.35075	0.0275663	0.333323	-3.48738
TTC39C	-0.180243	8.1198	-2.35074	0.0275673	0.333323	-3.48741
TNFRSF11B	-0.256819	9.19025	-2.35066	0.0275719	0.333323	-3.48755
BCL6	-0.192608	10.4465	-2.35035	0.0275904	0.333323	-3.4881
XPNPEP3	0.161025	15.0609	2.35017	0.0276011	0.333323	-3.48842
SNORA67	0.212294	10.5849	2.34848	0.0277017	0.334112	-3.49142
TMEM33	-0.219345	9.29245	-2.34821	0.027718	0.334112	-3.49191
TMCO6	0.178201	9.02418	2.34681	0.027802	0.334813	-3.4944
AGPAT4	-0.161836	8.86601	-2.34454	0.0279383	0.335333	-3.49844
ABCC6P2	-0.163959	8.17927	-2.34427	0.0279541	0.335333	-3.4989
OR2A14	0.255999	7.7071	2.34418	0.0279596	0.335333	-3.49906
CCDC137	0.321438	8.94244	2.34396	0.0279729	0.335333	-3.49946
SHISA3	-0.243328	7.87659	-2.3434	0.0280066	0.335333	-3.50045
CRCT1	0.230339	7.58918	2.34309	0.0280258	0.335333	-3.50101
SRRT	0.217175	12.4382	2.34308	0.0280263	0.335333	-3.50103
SLC25A48	0.331477	7.56864	2.34203	0.0280897	0.335517	-3.50289
SGSM3	0.237117	8.27631	2.34186	0.0281	0.335517	-3.50319
ITPRIP	0.172242	11.4549	2.34121	0.0281392	0.335517	-3.50434
IDNK	-0.216701	9.45648	-2.34093	0.0281562	0.335517	-3.50484
CCNE1	0.1975	9.53538	2.34054	0.0281799	0.335517	-3.50553
HIST1H3C	-0.250062	8.01278	-2.34005	0.0282099	0.335517	-3.50641
PVRL3	-0.202652	12.0677	-2.33983	0.028223	0.335517	-3.50679
SNAPIN	-0.248732	9.8788	-2.33871	0.028291	0.335818	-3.50877
NLGN2	0.251254	9.9773	2.33822	0.0283209	0.335818	-3.50965
SERPINA1	-0.264647	9.49296	-2.33814	0.0283261	0.335818	-3.5098
ZNF550	-0.175724	8.47775	-2.33622	0.028443	0.336725	-3.51319
UST	-0.182088	8.13674	-2.33603	0.0284546	0.336725	-3.51353
PRRC2B	0.268391	9.78979	2.33514	0.0285096	0.337069	-3.51512
U2AF1	0.776929	9.72529	2.33373	0.028596	0.337308	-3.51761
FNIP2	-0.196236	8.65288	-2.33341	0.028616	0.337308	-3.51819
COMMD3	-0.147566	12.6309	-2.33318	0.0286298	0.337308	-3.51858
EPB41L4A	0.227385	8.73052	2.33234	0.0286815	0.337308	-3.52007
ZBTB41	-0.209386	8.16135	-2.33211	0.0286959	0.337308	-3.52048
TRMT1	0.260712	11.2838	2.33199	0.0287031	0.337308	-3.52069
ESPL1	0.214531	9.28686	2.33185	0.028712	0.337308	-3.52095
CADPS2	-0.235803	8.91088	-2.33073	0.0287808	0.337809	-3.52292
METTL25	-0.225805	9.39802	-2.3289	0.0288944	0.338836	-3.52616
CARD8	0.178365	10.2902	2.32843	0.0289238	0.338873	-3.527
NUCKS1	-2.08206	13.1235	-2.32609	0.0290692	0.339597	-3.53113
DUSP28	-0.166459	9.32234	-2.32606	0.0290713	0.339597	-3.53118
EXOSC4	0.271785	10.2233	2.32585	0.0290844	0.339597	-3.53156
IL11RA	1.12026	8.63681	2.32576	0.0290904	0.339597	-3.53173
OGFOD3	0.208829	9.09757	2.32468	0.0291578	0.339788	-3.53363
ERLIN2	-0.191785	9.29442	-2.32466	0.0291591	0.339788	-3.53367
C20orf27	0.17483	10.9958	2.32398	0.0292013	0.339973	-3.53486
TMEM11	0.283044	8.9373	2.32211	0.0293192	0.340572	-3.53817
ZNF224	-0.192965	8.66487	-2.32185	0.0293354	0.340572	-3.53863
PBX3	0.151796	10.9898	2.32124	0.0293736	0.340572	-3.5397
NCK1	-0.166488	10.7445	-2.32116	0.0293788	0.340572	-3.53985
CHST10	0.225301	9.48637	2.32053	0.0294189	0.340572	-3.54097
SHOC2	-0.209798	9.9761	-2.3202	0.0294391	0.340572	-3.54153
PDCD10	-0.280421	8.75709	-2.32011	0.0294452	0.340572	-3.54171
CTHRC1	-0.36727	9.38164	-2.31983	0.029463	0.340572	-3.5422
LGALSL	-0.27934	8.43705	-2.31758	0.0296055	0.341914	-3.54617
BRMS1	0.263911	9.37722	2.31622	0.0296917	0.342604	-3.54856
IDH3G	0.22647	10.5657	2.3146	0.029795	0.343434	-3.55142
DIAPH2	-0.198079	9.33133	-2.31426	0.0298166	0.343434	-3.55202
ZFP62	-0.134143	7.86043	-2.31368	0.0298538	0.343557	-3.55304
EDC3	0.208275	8.98015	2.31205	0.0299581	0.343791	-3.55591
PRPF3	0.141014	11.6823	2.31191	0.0299676	0.343791	-3.55617
NEK3	-0.220572	8.90776	-2.31157	0.029989	0.343791	-3.55676
BLOC1S2	-0.147157	7.979	-2.31138	0.0300012	0.343791	-3.55709
SOD3	-0.256633	8.14974	-2.3111	0.0300194	0.343791	-3.55759
ZNF217	-0.327781	10.8669	-2.31088	0.0300333	0.343791	-3.55797
C19orf60	0.214505	8.21058	2.30856	0.030183	0.345008	-3.56206
NT5DC2	0.247498	10.4107	2.30769	0.0302391	0.345008	-3.56359
OLFML3	-0.155831	7.87244	-2.30688	0.0302921	0.345008	-3.56503
CPEB3	-0.186176	8.34327	-2.30647	0.0303184	0.345008	-3.56574
NUP54	-0.254765	9.55256	-2.3064	0.0303227	0.345008	-3.56586
LARP1	0.239755	11.1868	2.30519	0.0304018	0.345008	-3.568
ATL1	-0.199618	9.62311	-2.3048	0.0304269	0.345008	-3.56868
RNASE10	0.222665	8.34888	2.30474	0.0304308	0.345008	-3.56878
GPC6	-0.265881	9.61547	-2.30465	0.0304371	0.345008	-3.56895
TAP1	-0.189445	11.9988	-2.30428	0.0304612	0.345008	-3.56961
URM1	0.168874	12.2569	2.30418	0.0304675	0.345008	-3.56978
TMEM2	0.186512	9.85169	2.30399	0.0304801	0.345008	-3.57011
SURF2	0.248955	8.36861	2.3034	0.0305185	0.345008	-3.57115
COX7A2	-0.175449	13.798	-2.30332	0.0305235	0.345008	-3.57129
KLHDC4	0.18549	9.55354	2.30308	0.030539	0.345008	-3.5717
MAPKBP1	0.313425	8.57734	2.30203	0.0306081	0.345456	-3.57356
MAPK15	0.217872	7.73496	2.30047	0.0307104	0.345456	-3.5763
PPFIBP1	-0.480654	9.48959	-2.29973	0.030759	0.345456	-3.5776
CES3	0.209381	7.76598	2.29957	0.0307691	0.345456	-3.57787
PTRH2	0.200049	8.68663	2.2986	0.0308334	0.345456	-3.57959
EIF4G1	0.276414	12.5507	2.29851	0.0308392	0.345456	-3.57974
ANKRD13B	0.25756	8.07886	2.29828	0.0308544	0.345456	-3.58015
LINC00704	0.212869	11.7203	2.29802	0.0308712	0.345456	-3.58059
FAM46A	-0.311605	10.5966	-2.2974	0.0309126	0.345456	-3.58169
GPR37	-0.219035	8.33232	-2.29705	0.0309352	0.345456	-3.58229
SDHAF3	-0.217815	9.38582	-2.29655	0.0309684	0.345456	-3.58318
FTSJ3	0.191685	10.0301	2.29642	0.0309772	0.345456	-3.58341
CTBP1	0.242188	9.33661	2.29639	0.0309789	0.345456	-3.58345
DEF6	0.202801	9.26938	2.29614	0.0309959	0.345456	-3.5839
IQGAP3	-0.222069	8.07568	-2.29585	0.031015	0.345456	-3.58441
PDIA3P1	-0.288659	9.48458	-2.29568	0.031026	0.345456	-3.5847
ZNF33A	-0.185332	9.1789	-2.29464	0.0310954	0.345456	-3.58654
PLTP	-0.185632	8.68438	-2.29443	0.0311092	0.345456	-3.5869
PSMB10	-0.213765	12.4101	-2.29387	0.0311464	0.345456	-3.58788
MAST3	0.208282	9.45636	2.2938	0.0311511	0.345456	-3.58801
TUSC3	-0.270979	8.10314	-2.29366	0.03116	0.345456	-3.58824
KCTD3	-0.222054	11.1433	-2.29359	0.0311652	0.345456	-3.58838
TNFSF15	-0.685776	8.99335	-2.29221	0.0312567	0.346174	-3.59079
TAAR1	-0.149734	7.66764	-2.29103	0.0313355	0.346346	-3.59285
HOMER3	0.282805	9.58646	2.29044	0.0313749	0.346346	-3.59389
OR52W1	0.398798	7.59648	2.29043	0.0313757	0.346346	-3.59391
CYB561A3	0.183314	10.0249	2.29037	0.0313798	0.346346	-3.59401
TPST2	-0.165607	12.1013	-2.28998	0.0314058	0.346346	-3.5947
HS2ST1	-0.196247	8.54005	-2.28896	0.0314747	0.346595	-3.59649
BMS1P5	0.166709	13.3982	2.28885	0.0314819	0.346595	-3.59668
CAMK1G	0.359144	8.00682	2.28833	0.0315171	0.346688	-3.5976
C2CD2L	0.212614	8.77565	2.2872	0.0315927	0.346943	-3.59957
PMS2	-0.224472	8.80982	-2.28704	0.0316037	0.346943	-3.59985
CFI	-0.232391	8.6685	-2.28679	0.0316206	0.346943	-3.60029
SNHG8	-0.231266	11.1754	-2.28618	0.0316615	0.346943	-3.60135
CTSO	-0.329967	8.87155	-2.28506	0.0317371	0.346943	-3.60331
SCPEP1	-0.137387	10.8132	-2.28494	0.0317455	0.346943	-3.60353
LIF	0.230768	8.72122	2.28483	0.0317532	0.346943	-3.60373
C1GALT1	-0.213619	9.29609	-2.28434	0.0317858	0.346943	-3.60457
SNORD25	-0.205164	8.29254	-2.28404	0.0318065	0.346943	-3.6051
IL17RD	-0.155479	7.88423	-2.2838	0.0318227	0.346943	-3.60552
ZNF324	0.187876	9.62471	2.28362	0.0318348	0.346943	-3.60583
CACTIN	0.195012	9.12477	2.28207	0.0319404	0.347021	-3.60855
MBD1	0.217274	9.06486	2.28151	0.0319786	0.347021	-3.60953
KIFAP3	-0.167836	10.2093	-2.28142	0.0319848	0.347021	-3.60969
CNOT8	-0.22048	9.13762	-2.28139	0.0319869	0.347021	-3.60974
ATP6V1G1	-0.148016	12.4188	-2.28122	0.0319981	0.347021	-3.61003
COMMD10	-0.284556	10.7116	-2.28098	0.0320146	0.347021	-3.61046
ORC4	-0.151645	8.14432	-2.28076	0.0320294	0.347021	-3.61083
ODF2L	-0.188898	9.07727	-2.27817	0.0322066	0.348272	-3.61536
PPIF	0.227648	8.15615	2.27807	0.0322136	0.348272	-3.61554
FMO3	-0.189007	7.72379	-2.27686	0.0322964	0.348272	-3.61764
HSF2	-0.232747	9.87005	-2.2768	0.0323011	0.348272	-3.61776
SNORD33	-0.350846	9.12962	-2.27656	0.0323176	0.348272	-3.61818
ZNRF3	0.177897	8.20584	2.27639	0.0323293	0.348272	-3.61848
SDHAF1	0.234102	8.34187	2.27633	0.032333	0.348272	-3.61857
MFAP4	0.225551	7.72664	2.27472	0.0324439	0.349176	-3.62138
MRTO4	0.322606	10.2639	2.27397	0.0324956	0.349442	-3.62269
CTSV	-0.190388	8.80671	-2.27184	0.0326437	0.350744	-3.62642
ACTR3B	0.145392	7.93765	2.27089	0.0327095	0.35116	-3.62807
FASN	0.280993	11.8158	2.27013	0.0327624	0.351203	-3.62939
IFI16	-0.253646	11.1736	-2.27005	0.0327678	0.351203	-3.62953
SUMO1P3	-0.202823	7.90891	-2.26951	0.0328057	0.35132	-3.63048
SIGIRR	0.208	8.54882	2.26907	0.0328365	0.351359	-3.63125
EXOSC9	-0.18396	11.1248	-2.26868	0.0328636	0.351359	-3.63192
ILF2	-0.162071	13.069	-2.26753	0.0329438	0.351857	-3.63392
CAMK2N1	0.244667	11.9446	2.26678	0.0329962	0.351857	-3.63522
L3MBTL3	-0.212011	8.24767	-2.26665	0.0330058	0.351857	-3.63546
MORC2	0.181675	9.52117	2.26646	0.0330188	0.351857	-3.63579
ADRBK1	0.210345	11.2992	2.26546	0.0330894	0.352319	-3.63754
NUBP2	0.234842	8.80303	2.26393	0.033197	0.353174	-3.64019
TYK2	0.178599	12.0786	2.26325	0.0332446	0.353391	-3.64137
USP4	-0.503096	8.64685	-2.26023	0.0334583	0.355371	-3.64662
HOXC8	0.323842	9.13678	2.25982	0.0334874	0.355389	-3.64733
DNM3	-0.156518	7.78446	-2.25914	0.0335364	0.355402	-3.64853
ZBTB46	-0.175489	7.72675	-2.25904	0.0335435	0.355402	-3.6487
YPEL1	-0.181656	8.24935	-2.25728	0.0336685	0.356356	-3.65175
ARPC5	-0.183535	13.3313	-2.257	0.0336885	0.356356	-3.65224
MFAP5	-0.217237	8.20382	-2.25586	0.03377	0.35672	-3.65422
BYSL	0.155704	11.317	2.25575	0.033778	0.35672	-3.65441
TPM3P9	0.23486	9.33889	2.25514	0.0338218	0.356724	-3.65547
TCEA3	-0.320326	10.0156	-2.25498	0.0338335	0.356724	-3.65575
USP45	0.166622	7.96794	2.25453	0.0338657	0.356774	-3.65653
INTS3	0.209646	11.1828	2.25346	0.0339421	0.356919	-3.65838
GALNT18	0.218656	8.38535	2.25329	0.0339545	0.356919	-3.65868
SEMA6A	-0.171985	7.96691	-2.25298	0.0339773	0.356919	-3.65923
RPL12P1	-0.193931	8.32416	-2.25247	0.0340138	0.356919	-3.66011
SPRYD3	0.184511	9.68242	2.25242	0.0340172	0.356919	-3.66019
SMIM11	-0.135508	8.62433	-2.25169	0.0340697	0.35718	-3.66145
UBE2J1	-0.186467	10.3504	-2.251	0.0341196	0.357414	-3.66265
GAS2L2	-0.405181	7.4767	-2.24987	0.0342017	0.357985	-3.66462
RAD51D	0.203491	8.47727	2.24708	0.0344039	0.358826	-3.66944
RBM14	0.23113	11.8684	2.24708	0.0344043	0.358826	-3.66945
CRB3	0.266727	7.95848	2.24603	0.0344811	0.358826	-3.67127
ATXN1	-0.191947	9.70192	-2.24576	0.0345004	0.358826	-3.67173
ZNF277	-0.194613	9.79117	-2.2457	0.034505	0.358826	-3.67184
MARK1	-0.173939	7.85681	-2.24568	0.0345061	0.358826	-3.67187
STK10	0.18703	9.51182	2.24559	0.034513	0.358826	-3.67203
FKBP11	0.220707	9.56718	2.24538	0.0345282	0.358826	-3.67239
YIPF4	-0.223322	11.0069	-2.24428	0.0346091	0.358826	-3.67431
SIPA1L3	0.273926	9.10861	2.24392	0.0346352	0.358826	-3.67493
MIR7-1	-0.149774	7.76524	-2.24391	0.034636	0.358826	-3.67494
DZANK1	0.232721	8.08931	2.24383	0.034642	0.358826	-3.67508
PRDM16	0.226592	7.43273	2.2437	0.0346513	0.358826	-3.6753
PROCA1	0.172875	7.85332	2.24309	0.0346958	0.358826	-3.67635
SPATA7	-0.169593	9.27161	-2.24307	0.0346974	0.358826	-3.67639
BCR	0.28582	8.40692	2.2422	0.0347617	0.359204	-3.67791
RALGPS2	-0.224138	8.23157	-2.24149	0.0348138	0.359247	-3.67913
TESK2	-0.167923	8.3926	-2.24108	0.0348435	0.359247	-3.67983
CCRN4L	-0.275141	9.59317	-2.24101	0.0348491	0.359247	-3.67996
CCDC25	-0.194235	9.56816	-2.23967	0.0349477	0.359978	-3.68227
GPATCH2	-0.23011	8.60629	-2.23895	0.0350007	0.360238	-3.68351
EIF2AK2	-0.17171	11.8119	-2.2383	0.0350494	0.360452	-3.68465
COQ5	-0.157707	11.4969	-2.23768	0.035095	0.360593	-3.68571
RND2	0.228569	7.60998	2.23736	0.0351187	0.360593	-3.68626
SLC6A8	0.192161	7.68544	2.23594	0.0352245	0.361393	-3.68872
TMEM50A	-0.165286	9.08461	-2.23514	0.0352836	0.361712	-3.69009
FASTKD5	0.19882	10.3128	2.2339	0.0353763	0.362137	-3.69224
MGA	0.23035	9.19391	2.23344	0.0354109	0.362137	-3.69304
EBF2	-0.218183	7.65878	-2.23327	0.0354237	0.362137	-3.69334
MUC15	-0.237116	8.48505	-2.23291	0.0354505	0.362137	-3.69395
PPIL1	-0.168439	11.5352	-2.23219	0.0355047	0.362137	-3.6952
PCBP2	0.217761	8.90203	2.23149	0.0355566	0.362137	-3.6964
CCDC23	-0.194222	11.3772	-2.23055	0.0356276	0.362137	-3.69803
DIAPH1	0.169168	11.8686	2.22984	0.0356806	0.362137	-3.69924
ADPRHL1	0.176141	8.83918	2.22969	0.0356921	0.362137	-3.69951
EAF2	-0.148123	7.55275	-2.22947	0.0357087	0.362137	-3.69988
CUL1	0.148754	10.6581	2.22911	0.0357357	0.362137	-3.7005
PAGE2B	-0.232501	8.20626	-2.22902	0.0357426	0.362137	-3.70066
POLR3F	-0.262485	9.28741	-2.22881	0.0357585	0.362137	-3.70102
GLS	0.216206	10.6341	2.22867	0.0357693	0.362137	-3.70127
TAX1BP3	0.150437	12.337	2.22804	0.0358165	0.362137	-3.70235
YTHDF3	-0.149711	9.78906	-2.2277	0.035842	0.362137	-3.70293
ABCF2	-0.473829	9.09466	-2.22762	0.0358486	0.362137	-3.70308
RABL2A	-0.139987	8.4767	-2.22739	0.0358659	0.362137	-3.70348
INPP4B	-0.193351	10.0955	-2.22732	0.0358709	0.362137	-3.70359
ANKRD23	0.190067	7.97409	2.22687	0.0359054	0.362137	-3.70437
GBF1	0.241852	9.55677	2.22678	0.0359118	0.362137	-3.70452
IGBP1	-0.207272	10.9869	-2.22611	0.0359629	0.362369	-3.70568
KDM6A	-0.195002	9.13612	-2.2252	0.036032	0.362783	-3.70725
ZNF226	-0.19519	8.66034	-2.22424	0.0361045	0.36322	-3.70889
RBM38	-0.384195	9.4162	-2.22347	0.0361631	0.36322	-3.71022
SRF	0.211391	12.4038	2.22274	0.0362189	0.36322	-3.71147
CDKN2AIP	-0.177034	10.2067	-2.22262	0.0362284	0.36322	-3.71169
LOC100293704	0.196711	8.6284	2.22255	0.0362338	0.36322	-3.71181
CUBN	-0.16288	8.79851	-2.22242	0.0362435	0.36322	-3.71203
CALM3	0.168276	13.7608	2.22187	0.0362851	0.363356	-3.71297
WHSC1L1	-0.140537	8.15113	-2.22135	0.0363254	0.36339	-3.71387
C17orf107	0.187545	7.63196	2.2211	0.0363446	0.36339	-3.71431
TMEM69	0.234141	11.4423	2.22072	0.0363737	0.3634	-3.71496
SRP54	-0.137971	11.9734	-2.21898	0.0365067	0.364079	-3.71794
UBE2Q2	-0.245665	10.6142	-2.21891	0.036512	0.364079	-3.71806
AMZ2	-0.184685	7.95863	-2.21873	0.036526	0.364079	-3.71837
ARL5A	0.313466	9.04973	2.21744	0.0366253	0.364097	-3.72059
HMCES	0.198645	10.837	2.21732	0.0366348	0.364097	-3.7208
CTDSP1	0.269316	8.63842	2.2173	0.0366365	0.364097	-3.72084
RNU11	-0.604517	8.73524	-2.21666	0.036686	0.364097	-3.72194
MRPL50	-0.206105	11.3729	-2.21653	0.0366959	0.364097	-3.72216
TGFB1I1	0.219426	8.93838	2.2164	0.0367058	0.364097	-3.72238
MMAA	-0.133919	7.93832	-2.21616	0.0367244	0.364097	-3.72279
CIC	0.246964	9.58421	2.21431	0.0368675	0.365236	-3.72597
TMSB15B	0.623578	9.56064	2.21339	0.0369389	0.36563	-3.72755
BEX5	-0.191254	7.61181	-2.21307	0.0369637	0.36563	-3.72809
ZFAND1	-0.207844	9.05688	-2.21161	0.0370777	0.366478	-3.73061
NEK4	-0.191321	7.9027	-2.21059	0.0371572	0.366699	-3.73236
MRPS21	-0.190557	11.6353	-2.21048	0.0371654	0.366699	-3.73254
DAB2IP	0.202301	8.19843	2.21023	0.0371849	0.366699	-3.73296
ZBTB42	-0.266133	8.94954	-2.20976	0.0372222	0.366787	-3.73378
MAP3K1	-0.216775	10.1014	-2.20858	0.037314	0.367041	-3.73579
ZC3H18	0.241799	8.74509	2.20848	0.0373219	0.367041	-3.73596
RPLP0	-0.143197	14.9833	-2.20834	0.037333	0.367041	-3.73621
ITGA1	-0.209829	8.15213	-2.20754	0.0373957	0.36738	-3.73758
DDX47	-0.119739	12.4341	-2.20674	0.0374588	0.367565	-3.73895
RGS7	-0.167047	7.99206	-2.20658	0.0374713	0.367565	-3.73922
STOM	-0.438395	9.61171	-2.20581	0.0375316	0.367878	-3.74054
LINC00347	-0.182599	7.94189	-2.2051	0.0375878	0.36815	-3.74176
RAB11FIP5	0.202437	11.6565	2.20394	0.0376798	0.368715	-3.74375
MRPS18C	-0.221379	12.5123	-2.20365	0.0377024	0.368715	-3.74424
ATRAID	-0.134888	12.954	-2.2027	0.0377777	0.369173	-3.74586
SMAD7	-0.185257	8.90561	-2.20195	0.0378377	0.369404	-3.74716
EMC8	-0.163638	9.55056	-2.20042	0.0379588	0.369404	-3.74976
GMFB	-0.168457	12.5752	-2.20012	0.0379831	0.369404	-3.75029
LASP1	0.179606	14.1119	2.20002	0.0379907	0.369404	-3.75045
CSPG5	-0.160736	7.76837	-2.19996	0.0379957	0.369404	-3.75056
ZBTB11-AS1	-0.129971	8.46521	-2.19987	0.0380029	0.369404	-3.75071
ERCC1	0.210194	8.81593	2.19976	0.0380113	0.369404	-3.75089
FUNDC1	-0.22609	9.87768	-2.19954	0.0380294	0.369404	-3.75128
IL21R	0.231973	8.1078	2.19856	0.0381076	0.369887	-3.75295
SETDB2	-0.210737	9.71025	-2.19759	0.0381853	0.370363	-3.75461
CENPU	-0.220904	9.91815	-2.19695	0.0382358	0.370576	-3.75569
CCPG1	1.00928	8.56188	2.19589	0.0383212	0.370917	-3.75751
DLEU1	0.664829	9.50089	2.19517	0.0383789	0.370917	-3.75874
ESD	-0.221263	9.36718	-2.19492	0.0383989	0.370917	-3.75916
SNAPC2	0.200155	10.9671	2.19429	0.0384503	0.370917	-3.76025
TMEM38B	-0.204866	9.61676	-2.19417	0.0384593	0.370917	-3.76044
DNAJA2	-0.162006	12.0613	-2.19368	0.0384989	0.370917	-3.76128
NCAPD2	0.17754	11.0456	2.19284	0.0385671	0.370917	-3.76272
SLC39A7	0.295855	8.83217	2.19266	0.0385812	0.370917	-3.76302
MGLL	0.302635	9.82524	2.19245	0.0385988	0.370917	-3.76339
RIF1	-0.235347	9.35356	-2.19236	0.038606	0.370917	-3.76354
HLA-DMB	-0.31377	8.54405	-2.19226	0.038614	0.370917	-3.76371
APOL2	0.219654	7.85512	2.19195	0.0386391	0.370917	-3.76424
MED4	-0.17669	9.87203	-2.19189	0.0386434	0.370917	-3.76433
CARD16	-0.237663	8.26511	-2.19154	0.0386718	0.370917	-3.76493
PIK3IP1	-0.243852	9.28798	-2.19094	0.0387207	0.371011	-3.76596
SGCB	-0.204039	9.25693	-2.19071	0.0387391	0.371011	-3.76635
MRPL15	-0.233269	11.3176	-2.19036	0.0387674	0.371011	-3.76694
CCDC127	0.152271	9.10074	2.18892	0.0388851	0.371863	-3.76941
FKBP8	0.231122	8.77492	2.18837	0.0389298	0.372015	-3.77035
SALL1	0.242485	7.36804	2.18777	0.0389788	0.372066	-3.77137
ABCA1	-0.321682	9.94564	-2.1876	0.0389926	0.372066	-3.77166
OAS3	-0.269765	9.67516	-2.18645	0.0390861	0.372563	-3.77361
RGS17	-0.203425	10.2914	-2.18601	0.0391223	0.372563	-3.77436
BTN3A1	-0.202247	9.07481	-2.18589	0.0391317	0.372563	-3.77456
COX7A2L	-0.137372	12.5237	-2.1846	0.039238	0.372563	-3.77677
ILF3	1.13471	10.5386	2.18453	0.0392436	0.372563	-3.77688
POLG	0.18596	10.1201	2.18442	0.0392527	0.372563	-3.77707
IQCB1	-0.137981	9.58482	-2.18439	0.0392553	0.372563	-3.77713
CIR1	-0.212787	9.37876	-2.18415	0.0392747	0.372563	-3.77753
KLHL3	-0.175568	7.98797	-2.1836	0.0393202	0.372608	-3.77847
MMP11	-0.216524	8.28506	-2.18339	0.0393369	0.372608	-3.77882
NAT10	0.188037	11.8283	2.18277	0.0393881	0.372634	-3.77988
SLC30A9	-0.159428	11.2889	-2.18249	0.0394114	0.372634	-3.78036
C10orf2	0.187621	9.77604	2.18218	0.0394368	0.372634	-3.78088
CEP85	0.183538	9.31507	2.18196	0.0394551	0.372634	-3.78126
LOC644173	-0.276742	9.10401	-2.18161	0.0394835	0.372634	-3.78185
IDI2	0.269735	7.69419	2.18106	0.0395294	0.372796	-3.78279
ZNF624	-0.140922	7.97124	-2.18	0.0396169	0.37335	-3.78459
FOSL1	0.273368	11.6609	2.17885	0.0397118	0.373398	-3.78654
ATG16L2	0.224709	9.23286	2.17882	0.0397143	0.373398	-3.78659
RYR2	-0.164608	7.77557	-2.1783	0.0397578	0.373398	-3.78748
KRTAP10-4	0.2411	7.42304	2.17795	0.0397872	0.373398	-3.78808
PKNOX1	0.192092	9.57629	2.17753	0.0398217	0.373398	-3.78879
SUGP1	0.177668	10.8156	2.17747	0.0398271	0.373398	-3.7889
AP1G1	0.137293	9.8314	2.1772	0.0398491	0.373398	-3.78935
SREK1	-0.187456	9.6107	-2.17716	0.0398526	0.373398	-3.78942
MBD3	0.226855	9.83927	2.17655	0.0399036	0.373423	-3.79046
WTIP	0.170215	8.27828	2.17636	0.039919	0.373423	-3.79077
SRSF11	-0.265253	9.1882	-2.17609	0.0399416	0.373423	-3.79123
OSGEPL1	-0.181366	8.88935	-2.17535	0.0400038	0.373709	-3.7925
SNORD65	-0.162448	8.65897	-2.17489	0.0400417	0.373709	-3.79327
MPDU1	0.287737	9.77291	2.17415	0.0401036	0.373709	-3.79453
RPL13	0.19518	9.68501	2.17382	0.0401311	0.373709	-3.79508
AATF	0.204483	11.5235	2.17368	0.040143	0.373709	-3.79532
SIX1	0.171006	9.30104	2.1733	0.0401752	0.373709	-3.79598
CATSPER2	0.213334	13.2178	2.17263	0.0402315	0.373709	-3.79712
HYI	0.197796	8.52988	2.17256	0.0402372	0.373709	-3.79723
FAM114A2	-0.151519	7.93994	-2.17231	0.0402582	0.373709	-3.79766
CRAT	0.259418	8.52541	2.17228	0.0402607	0.373709	-3.79771
KRR1	-0.20321	8.53618	-2.17106	0.0403635	0.374395	-3.79978
HEBP2	-0.209754	11.638	-2.17044	0.0404156	0.374566	-3.80083
CCNG2	-0.282567	9.38253	-2.16998	0.0404545	0.374566	-3.80161
RNF141	-0.186162	8.51732	-2.16839	0.0405882	0.374566	-3.8043
HAUS7	0.243824	8.584	2.16829	0.0405967	0.374566	-3.80446
AIDA	-0.157452	12.5836	-2.16829	0.0405971	0.374566	-3.80447
MARS2	0.181356	9.38088	2.16793	0.0406275	0.374566	-3.80508
CDC5L	-0.218531	10.3657	-2.16751	0.0406625	0.374566	-3.80578
GIMAP5	0.208351	7.68712	2.16751	0.0406625	0.374566	-3.80578
ZNF503	0.265851	9.51065	2.1675	0.0406638	0.374566	-3.80581
CDC42SE1	-0.184114	8.89015	-2.1674	0.0406725	0.374566	-3.80598
NDUFS5	-0.161485	13.5439	-2.16684	0.0407199	0.374566	-3.80693
ZNF695	0.256494	7.85436	2.16673	0.0407288	0.374566	-3.80711
APOPT1	-0.213083	8.12501	-2.16593	0.040797	0.374928	-3.80847
RPL30	-0.173355	14.577	-2.16538	0.0408438	0.375091	-3.8094
STAG3	0.21202	7.82089	2.1643	0.0409353	0.375476	-3.81122
CTNND1	-0.218941	8.77092	-2.16421	0.0409436	0.375476	-3.81138
NXN	-0.228893	8.44875	-2.16317	0.0410318	0.375945	-3.81313
KDELC1	-0.13527	8.09207	-2.16293	0.0410529	0.375945	-3.81355
GPR108	0.231204	10.2166	2.16168	0.04116	0.37666	-3.81566
CDCA5	0.163275	12.4964	2.15944	0.0413516	0.377708	-3.81944
GOPC	-0.176658	9.21531	-2.15941	0.0413548	0.377708	-3.8195
PIBF1	-0.22783	8.52973	-2.15932	0.0413619	0.377708	-3.81964
BRD2	0.158731	12.7087	2.1585	0.0414325	0.377807	-3.82103
ALDH3A2	0.141997	9.48274	2.15838	0.0414431	0.377807	-3.82123
ANAPC7	0.239367	9.65474	2.15787	0.0414876	0.377807	-3.82211
RHBDL2	0.18406	8.55092	2.15754	0.0415153	0.377807	-3.82265
CEBPD	-0.218144	10.2849	-2.15751	0.0415185	0.377807	-3.82271
TTC33	-0.263797	8.56557	-2.15616	0.0416349	0.378465	-3.82498
NR2F6	0.197902	11.2884	2.15559	0.0416843	0.378465	-3.82595
FAM183CP	-0.169795	7.76918	-2.15528	0.0417109	0.378465	-3.82647
LCAT	0.166949	7.99293	2.15517	0.0417207	0.378465	-3.82666
HYOU1	0.210235	11.0696	2.15498	0.0417369	0.378465	-3.82697
MAPK12	0.228628	8.65166	2.15385	0.0418358	0.378853	-3.82889
MAPK8IP1	0.170279	7.77808	2.15382	0.0418382	0.378853	-3.82894
C8orf4	-0.179039	7.67761	-2.15207	0.0419904	0.379781	-3.83189
RMND5B	0.262395	8.86773	2.15197	0.0419992	0.379781	-3.83206
LIAS	-0.162016	8.98675	-2.15048	0.0421292	0.380344	-3.83457
LONP1	0.206765	11.0731	2.14965	0.0422017	0.380344	-3.83596
PA2G4	0.146732	11.8986	2.14949	0.0422159	0.380344	-3.83624
ACOT13	-0.220908	10.6209	-2.14945	0.0422196	0.380344	-3.83631
SAMD9L	-0.267781	9.05373	-2.149	0.0422587	0.380344	-3.83706
ZNF350	-0.126459	8.15802	-2.14864	0.0422903	0.380344	-3.83766
IFI27	-0.300396	13.018	-2.14827	0.0423233	0.380344	-3.8383
PROK1	-0.187567	8.12807	-2.14809	0.0423391	0.380344	-3.8386
SDR42E1	-0.190935	8.67833	-2.14774	0.0423694	0.380344	-3.83918
PRKG1	0.200251	7.75134	2.14749	0.0423919	0.380344	-3.83961
RHOB	-0.248275	10.3693	-2.14742	0.042398	0.380344	-3.83973
UHMK1	-0.221104	8.89451	-2.1467	0.042461	0.380344	-3.84093
PGP	0.284842	8.51402	2.1456	0.0425579	0.380344	-3.84278
LIN7B	-0.205901	8.05135	-2.14471	0.0426366	0.380344	-3.84428
KIFC1	0.219844	11.6949	2.14452	0.0426538	0.380344	-3.84461
AIM2	-0.251327	9.13744	-2.14364	0.0427313	0.380344	-3.84608
RRBP1	0.967086	10.0199	2.14356	0.0427389	0.380344	-3.84623
UBE2Z	0.256752	8.34295	2.14236	0.0428453	0.380344	-3.84824
SNORD3A	-0.506201	10.9745	-2.14228	0.0428523	0.380344	-3.84838
PI4KB	-0.192906	10.0689	-2.14175	0.0428997	0.380344	-3.84927
SLC25A22	0.216037	9.75343	2.14173	0.0429015	0.380344	-3.84931
NSA2	-0.1393	13.0769	-2.14148	0.0429231	0.380344	-3.84972
SLC8B1	0.163798	11.1358	2.14113	0.0429543	0.380344	-3.8503
CAMLG	-0.131141	12.9171	-2.14091	0.0429739	0.380344	-3.85067
CPLX2	-0.16272	7.78817	-2.1409	0.0429754	0.380344	-3.8507
DCAF15	0.271901	8.8689	2.14035	0.0430239	0.380344	-3.85162
DYNC1LI1	-0.196224	8.05811	-2.14016	0.0430411	0.380344	-3.85194
ZFHX3	0.316325	10.589	2.13975	0.0430779	0.380344	-3.85264
CFL1	0.115667	14.0057	2.13951	0.0430993	0.380344	-3.85304
SC5D	0.246612	10.325	2.1394	0.0431087	0.380344	-3.85322
LAMC2	0.938868	9.83693	2.13872	0.0431691	0.380344	-3.85435
SUCLG2	-0.230684	11.2128	-2.13851	0.0431887	0.380344	-3.85472
CLIP2	0.157996	9.40108	2.1385	0.0431895	0.380344	-3.85473
ENPP2	-0.206906	7.61699	-2.13766	0.043264	0.380344	-3.85613
SLC2A3	-0.358679	12.1938	-2.13754	0.0432755	0.380344	-3.85635
SH3GLB2	0.20102	12.1568	2.13688	0.0433348	0.380344	-3.85746
SNORD100	-0.203521	8.26547	-2.13678	0.0433437	0.380344	-3.85762
KLB	0.166518	7.8714	2.13628	0.0433886	0.380344	-3.85846
PUS7	0.146542	10.7914	2.1362	0.0433953	0.380344	-3.85859
TAX1BP1	-0.127412	12.2278	-2.1358	0.0434315	0.380344	-3.85926
ELMOD2	-0.190569	8.97678	-2.13565	0.043445	0.380344	-3.85952
COX7B	-0.305428	12.0782	-2.13549	0.0434594	0.380344	-3.85978
MRPL22	-0.161079	12.1976	-2.13496	0.0435072	0.380344	-3.86067
SNRPN	-0.194471	7.95036	-2.13493	0.0435097	0.380344	-3.86072
RNF26	0.155174	10.8283	2.13477	0.043524	0.380344	-3.86099
EFHC1	-0.170488	8.87869	-2.13477	0.0435243	0.380344	-3.86099
MIR125B1	-0.285305	8.74251	-2.13477	0.0435245	0.380344	-3.861
SSBP2	-0.18435	8.69195	-2.13454	0.0435445	0.380344	-3.86137
TAOK1	-0.272628	9.74838	-2.13438	0.0435592	0.380344	-3.86164
C1RL	-0.192001	7.79181	-2.13415	0.0435802	0.380344	-3.86203
EDNRA	-0.375304	9.42164	-2.13316	0.0436698	0.380344	-3.8637
CAPZA1	-0.214841	9.63858	-2.13268	0.0437131	0.380344	-3.8645
TFAP4	0.197417	8.32569	2.13256	0.0437236	0.380344	-3.8647
USP8	-0.212506	9.47267	-2.13211	0.0437645	0.380344	-3.86545
RECQL5	0.175917	8.29491	2.13193	0.043781	0.380344	-3.86576
LOC338620	0.131525	7.93841	2.13146	0.043823	0.380344	-3.86654
SNORD68	-0.226525	9.01966	-2.13049	0.0439109	0.380344	-3.86816
SERPINA3	-0.466979	8.91703	-2.13005	0.043951	0.380344	-3.8689
ZCCHC9	-0.133789	11.4656	-2.12994	0.0439614	0.380344	-3.86909
MYO1E	0.137713	7.8985	2.12969	0.0439842	0.380344	-3.86951
ATP5SL	0.13572	11.2775	2.12932	0.0440176	0.380344	-3.87013
NLGN1	-0.177314	8.15948	-2.12889	0.0440571	0.380344	-3.87085
CD44	-0.230026	8.89543	-2.12883	0.0440622	0.380344	-3.87095
ANKIB1	-0.168828	11.0175	-2.12875	0.0440697	0.380344	-3.87108
ACTN4	0.206612	12.7649	2.12859	0.0440839	0.380344	-3.87135
SNORD1A	0.170895	8.01514	2.12833	0.0441082	0.380344	-3.87179
ARHGEF1	-0.677609	9.68722	-2.12817	0.0441227	0.380344	-3.87206
MEG8	-0.147124	7.86665	-2.12715	0.0442158	0.380344	-3.87377
CAPN2	-0.24706	10.2909	-2.12692	0.0442361	0.380344	-3.87414
F2RL1	-0.242381	12.5685	-2.12676	0.0442513	0.380344	-3.87442
ARHGEF10	0.13407	10.9099	2.12659	0.044267	0.380344	-3.8747
CFB	-0.276714	10.3857	-2.12631	0.0442925	0.380344	-3.87517
URB1	0.173567	8.55374	2.12629	0.0442939	0.380344	-3.87519
MIR98	-0.212816	7.9496	-2.12616	0.0443059	0.380344	-3.87542
OAF	0.142401	12.2292	2.12603	0.044318	0.380344	-3.87564
SCRIB	0.172181	8.36391	2.12597	0.0443232	0.380344	-3.87573
NPHP1	-0.179218	7.97568	-2.12591	0.0443288	0.380344	-3.87583
METTL3	0.196575	10.6864	2.12567	0.044351	0.380344	-3.87624
ADGRG2	-0.134598	7.78763	-2.12483	0.0444283	0.380755	-3.87765
SNORD31	0.264966	9.58471	2.12443	0.0444647	0.380816	-3.87831
PUSL1	0.181605	8.54516	2.12346	0.0445539	0.381327	-3.87994
RAPGEF1	0.205551	7.89675	2.12241	0.0446509	0.381905	-3.8817
MAN2B2	-0.152687	11.4962	-2.12179	0.0447077	0.381942	-3.88272
AHR	-0.279868	9.35259	-2.12172	0.0447142	0.381942	-3.88284
TOP1	0.246896	9.46035	2.12096	0.044784	0.38199	-3.88411
DDX17	0.535148	9.57738	2.1208	0.044799	0.38199	-3.88438
METTL18	-0.198279	8.50444	-2.12045	0.0448313	0.38199	-3.88496
RNU12-2P	-0.357991	7.72661	-2.12014	0.0448599	0.38199	-3.88548
SNORD17	0.185168	8.34054	2.11998	0.0448747	0.38199	-3.88574
LINC00623	-0.129615	10.3746	-2.11975	0.0448966	0.38199	-3.88614
DAGLB	0.195527	10.5075	2.11928	0.0449401	0.382108	-3.88692
KIF25-AS1	-0.191254	7.44262	-2.11868	0.0449955	0.382329	-3.88792
CC2D2A	-0.177958	8.63631	-2.11815	0.0450453	0.38242	-3.88881
MICAL1	0.277096	9.22676	2.11793	0.0450653	0.38242	-3.88917
ARHGEF18	0.190093	13.163	2.1169	0.045161	0.38272	-3.89089
AGAP4	0.181469	8.10226	2.11669	0.0451805	0.38272	-3.89124
LTB4R	0.444014	9.86955	2.11637	0.04521	0.38272	-3.89177
MGST3	-0.176541	12.5338	-2.11628	0.0452187	0.38272	-3.89192
NR1H2	0.198223	10.2607	2.1155	0.0452917	0.383087	-3.89323
LGR6	-0.165415	7.67699	-2.11499	0.0453396	0.383127	-3.89408
RPL7P9	-0.296469	9.76295	-2.11482	0.0453555	0.383127	-3.89437
CDH11	-0.352016	10.6916	-2.11437	0.0453971	0.383229	-3.89511
ADAM11	-0.179035	7.44157	-2.11405	0.0454271	0.383232	-3.89565
MYO10	-0.204141	11.4353	-2.11297	0.0455281	0.383255	-3.89744
TOLLIP	0.22232	9.35168	2.11294	0.0455313	0.383255	-3.8975
MAGEL2	0.168847	8.99322	2.11292	0.0455332	0.383255	-3.89753
GNA11	0.240268	8.1793	2.11276	0.0455481	0.383255	-3.8978
MTMR14	0.143622	9.32187	2.11241	0.0455809	0.383264	-3.89838
SCARNA2	-0.366411	7.72913	-2.11201	0.0456186	0.383264	-3.89905
LAD1	0.130723	7.6748	2.11157	0.0456602	0.383264	-3.89978
C19orf25	0.22095	9.17319	2.11126	0.0456891	0.383264	-3.9003
FGD1	0.170022	9.01931	2.11118	0.0456971	0.383264	-3.90044
SLC44A1	-1.12747	10.7138	-2.10962	0.0458432	0.384241	-3.90302
RSBN1L	-0.188634	8.77742	-2.10908	0.0458943	0.384249	-3.90392
ZNF7	-0.150209	9.61095	-2.10878	0.045923	0.384249	-3.90443
SMG5	0.168208	10.5205	2.10831	0.0459674	0.384249	-3.90521
SNTB2	0.219283	9.5449	2.10804	0.0459926	0.384249	-3.90565
GPR137	0.169753	11.786	2.10781	0.0460152	0.384249	-3.90605
SRGAP2	0.170504	8.85995	2.10764	0.0460306	0.384249	-3.90632
LMOD3	0.240571	11.487	2.10742	0.0460518	0.384249	-3.90669
NFATC3	0.151128	8.74665	2.10693	0.046098	0.384254	-3.9075
DEGS1	-0.125169	12.4652	-2.10679	0.0461117	0.384254	-3.90774
CORO7	0.208983	9.51453	2.10572	0.0462129	0.384747	-3.90951
PCBP4	-0.476764	9.54304	-2.10554	0.0462302	0.384747	-3.90982
LYPD1	-0.211344	8.43961	-2.10479	0.0463016	0.384804	-3.91106
EXO5	0.180274	9.54676	2.10432	0.0463463	0.384804	-3.91184
PLGLA	0.161487	7.81945	2.10423	0.0463552	0.384804	-3.912
ELAVL3	0.214967	7.68321	2.10412	0.0463654	0.384804	-3.91218
GOLGA5	-0.149821	10.936	-2.10333	0.0464409	0.384804	-3.91349
PPFIBP2	-0.182879	7.97823	-2.10323	0.0464501	0.384804	-3.91365
PLCH1	-0.155867	7.58584	-2.10276	0.0464958	0.384804	-3.91445
RUVBL1	0.359269	10.4298	2.10266	0.0465052	0.384804	-3.91461
PBRM1	0.187961	9.12139	2.10239	0.0465309	0.384804	-3.91506
C19orf66	-0.166576	9.29633	-2.10222	0.0465466	0.384804	-3.91533
ARMC7	0.165073	9.15477	2.10205	0.0465637	0.384804	-3.91563
IFIT3	0.378719	9.42713	2.10127	0.0466382	0.384863	-3.91692
CLN6	0.212252	8.2249	2.101	0.0466638	0.384863	-3.91736
IPO4	0.217383	9.94127	2.10056	0.0467062	0.384863	-3.91809
PTMA	-0.27851	11.587	-2.10047	0.046715	0.384863	-3.91825
DNAJB9	-0.243004	10.4211	-2.10039	0.0467225	0.384863	-3.91838
INVS	-0.131503	9.27922	-2.10011	0.0467491	0.384863	-3.91884
C8orf44	-0.15212	7.80339	-2.0994	0.0468177	0.385183	-3.92002
SPHAR	-0.194867	8.12414	-2.09824	0.0469295	0.385858	-3.92195
FKBP14	0.986327	10.0086	2.09715	0.0470345	0.385859	-3.92375
CNOT6L	-0.120355	8.28464	-2.09692	0.0470567	0.385859	-3.92413
HSD17B12	-0.156926	12.6973	-2.09676	0.0470721	0.385859	-3.9244
UPRT	-0.167251	10.114	-2.09675	0.0470727	0.385859	-3.92441
ZNF184	-0.180441	8.30448	-2.09642	0.0471051	0.385859	-3.92496
TARBP2	0.263977	9.36327	2.09626	0.0471206	0.385859	-3.92523
KLHL5	-0.154011	8.15167	-2.09572	0.0471724	0.385859	-3.92612
CCDC53	-0.188963	12.0187	-2.09498	0.047244	0.385859	-3.92734
USP27X-AS1	0.184483	8.17508	2.09498	0.0472449	0.385859	-3.92736
EMC3	-0.129002	11.7209	-2.09414	0.0473264	0.385859	-3.92875
HPSE	-0.175949	8.75255	-2.09408	0.0473322	0.385859	-3.92885
HSP90AB2P	0.143132	7.73707	2.09403	0.0473364	0.385859	-3.92892
IFNGR1	-0.160718	10.8079	-2.09398	0.0473417	0.385859	-3.92901
HIVEP3	0.196089	9.40925	2.0936	0.0473788	0.385859	-3.92964
CAMK2D	-0.168745	8.64833	-2.09351	0.0473875	0.385859	-3.92979
IGF2BP3	-0.24601	10.6329	-2.0932	0.0474177	0.385859	-3.93031
COPS5	-0.161316	12.0145	-2.09301	0.0474358	0.385859	-3.93061
OR6N1	-0.211427	7.27989	-2.09182	0.0475519	0.386474	-3.93259
FAM168B	0.170071	9.78926	2.0915	0.0475829	0.386474	-3.93311
DDX55	0.155274	12.1286	2.09121	0.0476117	0.386474	-3.9336
RNF128	-0.181619	8.77096	-2.09101	0.0476307	0.386474	-3.93392
SNORD76	-0.1898	7.84176	-2.08998	0.0477312	0.386608	-3.93563
XPO1	-0.192179	12.0085	-2.08982	0.047747	0.386608	-3.93589
ZFP1	-0.195141	8.39797	-2.0897	0.0477593	0.386608	-3.9361
RRP15	-0.164192	11.0709	-2.08924	0.0478039	0.386608	-3.93685
DCTN6	-0.231153	7.88072	-2.08918	0.04781	0.386608	-3.93696
C11orf1	-0.183021	10.9799	-2.08901	0.0478263	0.386608	-3.93723
LOC401286	0.244893	7.69714	2.0881	0.0479157	0.386672	-3.93874
EVPL	0.199929	9.33728	2.08787	0.0479381	0.386672	-3.93912
SGCE	-0.133362	11.9912	-2.08752	0.0479726	0.386672	-3.9397
SSTR1	0.219735	7.73206	2.08692	0.0480317	0.386672	-3.94069
OSTC	-0.150182	12.9547	-2.08675	0.0480486	0.386672	-3.94097
ATF3	-0.234604	9.22314	-2.08665	0.0480587	0.386672	-3.94114
CASP1	-0.220849	9.37535	-2.08621	0.0481017	0.386672	-3.94187
LRRC23	-0.174306	7.89108	-2.08615	0.0481076	0.386672	-3.94197
KIF3A	-0.157913	7.78894	-2.08608	0.0481146	0.386672	-3.94208
SNORA71A	-0.203003	8.05121	-2.08571	0.0481508	0.386672	-3.94269
SKA1	0.188673	9.32758	2.08558	0.0481637	0.386672	-3.94291
ZBTB3	-0.155797	9.08643	-2.08492	0.0482295	0.386672	-3.94401
TRMT11	-0.161055	10.2058	-2.08438	0.0482822	0.386672	-3.94489
ATP6V0A1	0.219897	11.8643	2.08431	0.0482889	0.386672	-3.945
AES	0.150554	12.302	2.08417	0.0483029	0.386672	-3.94523
ADO	-0.165082	10.2248	-2.08348	0.0483718	0.386672	-3.94638
NCOA4	-0.105036	12.9951	-2.08312	0.0484074	0.386672	-3.94698
ATF7	0.30904	7.82886	2.08272	0.0484471	0.386672	-3.94764
TUBA1B	0.133149	14.8324	2.08257	0.0484613	0.386672	-3.94787
GRWD1	0.201109	11.0936	2.08239	0.0484792	0.386672	-3.94817
TBC1D25	0.140917	8.49814	2.08185	0.048533	0.386672	-3.94907
TMF1	-0.204925	8.91304	-2.08184	0.048534	0.386672	-3.94908
CLPSL2	-0.161468	7.51787	-2.08181	0.0485367	0.386672	-3.94913
SPECC1L	0.171622	9.40973	2.08168	0.0485504	0.386672	-3.94935
LEMD2	0.169908	10.4915	2.08091	0.0486265	0.386832	-3.95062
C17orf58	-0.329373	10.4181	-2.08085	0.048633	0.386832	-3.95073
RPS6KB1	-0.169925	10.8128	-2.08047	0.0486706	0.386832	-3.95135
SEL1L3	-0.228043	8.66013	-2.08006	0.0487116	0.386832	-3.95203
DHX30	0.734092	10.8018	2.07987	0.0487306	0.386832	-3.95234
NLRP2	0.180667	8.82823	2.07968	0.0487495	0.386832	-3.95266
FAM188A	-0.157765	10.5135	-2.07896	0.0488213	0.386972	-3.95384
RNF39	0.301378	7.63493	2.0789	0.0488269	0.386972	-3.95394
MCAT	0.197395	8.74522	2.07836	0.0488811	0.387131	-3.95483
RBM34	-0.179002	10.8526	-2.07805	0.048912	0.387131	-3.95534
LRG1	-0.170425	8.03893	-2.07756	0.0489607	0.387131	-3.95614
SNX13	-0.167893	9.09663	-2.07704	0.0490129	0.387131	-3.957
ZNF585A	-0.208363	9.06487	-2.07701	0.049016	0.387131	-3.95705
GPR17	-0.166158	8.19266	-2.07684	0.0490334	0.387131	-3.95734
MRAS	0.23311	7.74351	2.07661	0.0490561	0.387131	-3.95771
MIR1281	0.384535	7.78251	2.07614	0.0491039	0.387272	-3.95849
NME7	-0.629507	10.2186	-2.07582	0.0491353	0.387284	-3.95901
MAPKAPK2	0.158443	10.9908	2.07502	0.0492162	0.387361	-3.96034
IFT140	0.166978	7.90569	2.07492	0.0492258	0.387361	-3.96049
SIRT1	-0.208204	9.03731	-2.0746	0.049258	0.387361	-3.96102
ZCCHC7	-0.176394	10.1655	-2.07454	0.0492646	0.387361	-3.96113
MED13	-0.150313	7.99228	-2.0741	0.049308	0.387467	-3.96184
SSH2	0.164239	9.68065	2.07364	0.0493553	0.387604	-3.96261
SLC24A3	0.187447	7.59165	2.07237	0.0494833	0.388374	-3.9647
HCFC1	0.204618	12.2848	2.07157	0.0495642	0.388773	-3.96602
MX1	-0.548098	10.9905	-2.07017	0.0497055	0.389646	-3.96831
MED15	0.267606	8.97603	2.06933	0.0497912	0.390081	-3.9697
MATN2	-0.170373	8.04274	-2.06901	0.0498238	0.390101	-3.97022
RHPN1	0.334921	8.73288	2.06862	0.0498631	0.390173	-3.97086
STXBP5	-0.166959	8.90013	-2.06731	0.0499974	0.390988	-3.97302
FAM107B	-0.185121	10.7703	-2.06615	0.050115	0.391498	-3.97492
GKAP1	-0.173236	8.09226	-2.06607	0.0501231	0.391498	-3.97505
WEE1	-0.218206	10.5455	-2.06462	0.0502718	0.392384	-3.97743
PRDM9	0.159352	7.74917	2.06438	0.0502971	0.392384	-3.97784
CAPN11	0.148582	8.71894	2.06367	0.0503696	0.392713	-3.979
HECA	-0.195734	8.92238	-2.06337	0.0504005	0.392718	-3.97949
KHK	0.166813	8.09954	2.06217	0.0505236	0.393275	-3.98145
STIP1	0.243145	12.4911	2.06208	0.0505327	0.393275	-3.9816
FKBP2	0.16052	8.23361	2.06176	0.050566	0.393298	-3.98213
FOXC1	0.24627	11.3987	2.0609	0.0506548	0.393407	-3.98354
RPS15	-1.54698	10.1024	-2.06089	0.0506557	0.393407	-3.98356
TRIM25	0.212552	10.3642	2.06074	0.0506711	0.393407	-3.9838
NPIPB5	0.330898	12.2227	2.05933	0.0508174	0.393965	-3.98612
QPCTL	-0.139313	8.00507	-2.05922	0.0508279	0.393965	-3.98629
AQP11	-0.169103	8.16085	-2.05916	0.0508342	0.393965	-3.98639
GAR1	0.909928	11.9995	2.05816	0.0509381	0.394486	-3.98803
CDC42EP2	0.18693	10.8214	2.05775	0.0509807	0.394486	-3.9887
OSCP1	-0.180834	7.99306	-2.05741	0.0510164	0.394486	-3.98926
NRBP2	0.208016	10.4269	2.05734	0.0510234	0.394486	-3.98938
SPDYE7P	0.203483	7.87867	2.05691	0.0510679	0.394486	-3.99008
FBN2	-0.119244	7.86182	-2.05676	0.0510841	0.394486	-3.99033
DNM2	0.520642	9.58671	2.05576	0.0511875	0.395049	-3.99196
RNF216P1	0.136109	10.0707	2.05459	0.0513095	0.395486	-3.99387
ALAS1	0.227127	8.41449	2.05457	0.051312	0.395486	-3.99391
C14orf166	-0.161526	12.8016	-2.05429	0.0513413	0.395486	-3.99437
MCTP1	-0.160804	9.14992	-2.05405	0.0513661	0.395486	-3.99476
GPCPD1	-0.194957	8.38475	-2.05336	0.0514386	0.395532	-3.9959
IFIT1	-0.19399	7.93534	-2.05326	0.0514485	0.395532	-3.99605
IL11	0.378946	8.78907	2.05305	0.0514702	0.395532	-3.99639
ETV6	-0.219823	10.4952	-2.0528	0.0514972	0.395532	-3.99681
MRPL55	-0.772055	9.30036	-2.05253	0.0515248	0.395532	-3.99724
MRPS33	-0.489409	9.59839	-2.05216	0.0515636	0.395596	-3.99785
COG5	-0.154662	8.87443	-2.05098	0.051688	0.39561	-3.99978
HNRNPL	-0.177455	10.3989	-2.05089	0.051697	0.39561	-3.99992
PRR19	0.155153	8.02887	2.05008	0.0517824	0.39561	-4.00125
CHMP1A	0.17918	11.018	2.04978	0.0518136	0.39561	-4.00173
ZNF80	0.124903	7.81641	2.04948	0.0518454	0.39561	-4.00223
RORA	-0.132125	7.85434	-2.04913	0.0518825	0.39561	-4.0028
CHMP5	-0.166195	12.9427	-2.04854	0.051945	0.39561	-4.00377
FADS2	0.288001	9.14409	2.04838	0.0519618	0.39561	-4.00403
SERINC2	-0.150979	8.24281	-2.04811	0.05199	0.39561	-4.00447
LOC401010	0.197374	7.81372	2.04732	0.0520732	0.39561	-4.00575
GCLM	0.171905	9.65128	2.04723	0.0520831	0.39561	-4.00591
KLHL25	0.14192	7.84489	2.04714	0.0520923	0.39561	-4.00605
HNRNPLL	-0.272034	9.5985	-2.04714	0.0520924	0.39561	-4.00605
WDR89	-0.150352	8.08892	-2.04702	0.0521051	0.39561	-4.00624
UQCRBP1	-0.207729	13.0018	-2.0469	0.052118	0.39561	-4.00644
CNKSR1	0.180351	7.75401	2.04614	0.0521983	0.39561	-4.00768
SH3YL1	-0.184516	8.3001	-2.04582	0.052232	0.39561	-4.0082
C20orf194	0.237355	9.08602	2.04567	0.0522485	0.39561	-4.00845
ZNF511	0.179607	10.7619	2.04532	0.0522855	0.39561	-4.00902
BZW1	-0.304729	9.33426	-2.04454	0.0523689	0.39561	-4.0103
PDIK1L	-0.24415	8.61095	-2.04442	0.0523809	0.39561	-4.01049
MRPS23	-0.22139	10.5798	-2.0443	0.0523943	0.39561	-4.01069
FRG1	-0.221227	11.4608	-2.04404	0.0524218	0.39561	-4.01111
VNN1	0.164972	7.95861	2.04384	0.0524429	0.39561	-4.01144
TGIF1	-0.15928	8.0402	-2.04332	0.0524983	0.39561	-4.01229
FAM179B	-0.214685	9.53642	-2.04325	0.0525053	0.39561	-4.01239
TEAD2	-0.201598	11.0419	-2.04298	0.052535	0.39561	-4.01285
PLEKHM2	0.147927	11.0179	2.04283	0.0525507	0.39561	-4.01309
TGM2	0.266619	9.64517	2.04237	0.0526002	0.39561	-4.01384
WARS2	-0.170472	8.97958	-2.0422	0.052618	0.39561	-4.01411
PABPC4	0.167925	12.4385	2.04177	0.0526635	0.39561	-4.01481
NSD1	0.14244	8.41454	2.0417	0.0526713	0.39561	-4.01493
NPIPB8	-0.440391	8.62896	-2.0416	0.0526814	0.39561	-4.01508
QTRT1	0.2318	9.8903	2.04129	0.0527152	0.39561	-4.0156
RBM4B	0.157287	10.7574	2.04118	0.0527265	0.39561	-4.01577
WDR46	0.217451	11.304	2.04062	0.0527867	0.39561	-4.01669
HNRNPAB	0.125229	13.8119	2.04023	0.0528288	0.39561	-4.01733
NXF1	0.251334	11.4248	2.04017	0.0528351	0.39561	-4.01742
ZNF713	0.158891	8.20653	2.03949	0.0529074	0.39561	-4.01852
IKBKG	0.180774	11.0356	2.03909	0.0529504	0.39561	-4.01917
TMEM104	0.173401	8.3682	2.03896	0.0529649	0.39561	-4.01939
ITM2B	-0.125389	7.77524	-2.03884	0.052978	0.39561	-4.01959
TNNT3	-0.3027	7.4587	-2.03881	0.0529805	0.39561	-4.01963
RAB8B	-0.159596	10.8736	-2.03878	0.0529845	0.39561	-4.01969
MDN1	0.186401	8.41593	2.03875	0.0529869	0.39561	-4.01973
RAP2A	-0.213886	10.2718	-2.03866	0.0529968	0.39561	-4.01988
CGB1	0.205043	8.57215	2.03848	0.0530167	0.39561	-4.02018
PIN1	0.113358	12.6056	2.03794	0.053074	0.39561	-4.02104
SNRPA	0.161266	10.6902	2.03763	0.0531076	0.39561	-4.02155
ZMYM5	-0.162625	8.67808	-2.03751	0.0531206	0.39561	-4.02175
SLC25A10	0.262544	10.1963	2.03749	0.0531225	0.39561	-4.02178
RCC2	0.164406	12.4559	2.0364	0.0532402	0.396076	-4.02356
TTLL12	0.254595	10.3877	2.03576	0.0533098	0.396076	-4.0246
KIAA1033	-0.235455	8.17674	-2.03573	0.0533124	0.396076	-4.02464
GGACT	-0.158282	7.84351	-2.03553	0.0533343	0.396076	-4.02497
FAM27L	0.278009	7.96014	2.03539	0.0533496	0.396076	-4.0252
CDK18	0.163347	7.69345	2.03521	0.0533685	0.396076	-4.02549
TIGD5	0.1587	10.5998	2.03475	0.0534182	0.396192	-4.02623
ZNF443	-0.156395	9.43169	-2.0345	0.0534452	0.396192	-4.02664
SEC24D	-0.238437	9.92315	-2.03407	0.0534918	0.396212	-4.02734
SERPINE1	0.27323	12.2397	2.03391	0.0535092	0.396212	-4.0276
AASDH	-0.189949	9.14474	-2.03363	0.0535397	0.396212	-4.02806
CA5B	-0.150614	8.01014	-2.03326	0.0535799	0.396283	-4.02866
IPO13	0.204027	9.75044	2.03189	0.0537291	0.397099	-4.03089
MZT1	-0.299834	9.14901	-2.03168	0.0537515	0.397099	-4.03123
HERC6	-0.292644	10.1889	-2.03114	0.0538104	0.397308	-4.0321
SYNC	-0.208708	8.21003	-2.03068	0.0538607	0.397345	-4.03285
ZBTB40	0.268471	9.94484	2.03022	0.0539105	0.397345	-4.0336
SULT1A3	0.256195	8.94034	2.03014	0.0539193	0.397345	-4.03373
PLAGL2	0.224186	10.5382	2.02983	0.0539532	0.397345	-4.03423
ZFP37	-0.152747	8.90223	-2.02969	0.0539687	0.397345	-4.03446
NME1	-0.134257	9.66387	-2.02932	0.0540092	0.397417	-4.03506
MRM1	0.164738	7.97407	2.02783	0.0541716	0.398327	-4.03747
PCDHB2	0.642238	7.98875	2.02746	0.0542129	0.398327	-4.03808
EML3	0.23728	11.1637	2.02699	0.054264	0.398327	-4.03884
PAG1	-0.166256	8.60271	-2.02616	0.0543557	0.398327	-4.04019
SNORD6	-0.201744	8.71626	-2.02611	0.054361	0.398327	-4.04027
CLPP	0.193524	11.4375	2.02607	0.0543655	0.398327	-4.04034
ZNF135	0.240113	7.35216	2.02577	0.0543981	0.398327	-4.04082
CTSL	0.219551	8.62189	2.02567	0.0544091	0.398327	-4.04098
SMG6	0.199912	8.82803	2.02567	0.0544095	0.398327	-4.04099
SEMA3B	0.217904	7.92928	2.02527	0.0544537	0.398425	-4.04164
SERPINA5	-0.315624	8.4781	-2.02458	0.0545288	0.39862	-4.04274
SLC30A7	-0.178713	10.9578	-2.02445	0.0545441	0.39862	-4.04297
TMEM263	-0.220835	9.8301	-2.02403	0.0545897	0.39862	-4.04364
CCDC85C	0.18266	10.4941	2.02378	0.0546178	0.39862	-4.04405
MRPS31	-0.142005	10.7514	-2.02363	0.0546342	0.39862	-4.04429
CRLF1	0.152238	7.86051	2.0232	0.054682	0.398745	-4.04499
ARRDC1	0.165498	8.22446	2.02218	0.0547941	0.398817	-4.04663
SNX3	-0.176129	7.60551	-2.02214	0.0547986	0.398817	-4.0467
DCAF10	-0.169881	9.38931	-2.02193	0.0548215	0.398817	-4.04703
GOLGB1	-0.144576	10.5325	-2.02176	0.0548411	0.398817	-4.04732
SH2B1	0.162274	8.88327	2.02128	0.0548943	0.398817	-4.0481
ANAPC10	-0.226509	10.2546	-2.02126	0.0548967	0.398817	-4.04813
GALNT5	-0.181044	8.98149	-2.0211	0.0549135	0.398817	-4.04838
ZNF346	0.176076	8.60695	2.02062	0.0549674	0.398817	-4.04916
SEC22C	0.203046	9.68104	2.02057	0.0549727	0.398817	-4.04924
SH3GL1	0.162501	9.64261	2.01992	0.0550447	0.398817	-4.05029
LAMTOR1	0.146044	11.8344	2.01992	0.0550448	0.398817	-4.05029
ZBTB11	-0.197777	8.2582	-2.01922	0.0551223	0.398817	-4.05142
CHTOP	0.137976	11.1186	2.01913	0.055133	0.398817	-4.05158
NCLN	0.212514	11.4316	2.01906	0.0551408	0.398817	-4.05169
MUC2	-0.141257	7.66867	-2.01894	0.0551535	0.398817	-4.05187
LDHB	-0.207147	13.159	-2.0185	0.0552027	0.398949	-4.05259
WNT5B	0.143592	10.508	2.01821	0.055235	0.398961	-4.05306
ASCC3	0.507014	9.58428	2.01793	0.0552667	0.398967	-4.05352
MTFR1	-0.176312	9.84904	-2.01622	0.0554574	0.399687	-4.05628
CACNB1	0.202143	7.93206	2.01622	0.0554575	0.399687	-4.05628
RASSF2	-0.124597	8.17956	-2.01621	0.055459	0.399687	-4.0563
CPOX	-0.214755	10.3657	-2.01504	0.0555892	0.400403	-4.05818
SNRPE	-0.188529	8.18264	-2.01407	0.0556981	0.400417	-4.05975
CAMSAP2	-0.185728	10.6568	-2.01387	0.0557209	0.400417	-4.06007
C3orf62	0.134296	8.77461	2.01385	0.0557236	0.400417	-4.06011
AHDC1	0.124484	7.88305	2.01382	0.0557266	0.400417	-4.06015
SNORD36C	-0.222136	8.89661	-2.01365	0.0557457	0.400417	-4.06043
ZNF148	-0.19682	11.2387	-2.01276	0.0558453	0.400814	-4.06186
MTOR	0.155413	10.3791	2.01243	0.0558829	0.400814	-4.0624
TIGD6	-0.12174	7.85576	-2.01233	0.0558937	0.400814	-4.06255
TXLNA	0.152663	12.0865	2.01176	0.055958	0.401053	-4.06347
EPB41L5	0.175321	8.58675	2.011	0.0560439	0.401446	-4.0647
FBXO32	-0.513749	9.80716	-2.00995	0.0561631	0.402078	-4.0664
MAGEA12	0.157934	7.55981	2.00946	0.0562187	0.402254	-4.06719
PPP2R5B	0.176844	9.15286	2.00904	0.0562654	0.402366	-4.06786
GPRASP2	-0.219813	9.68124	-2.0083	0.0563497	0.402746	-4.06906
UQCRC2	-0.188655	10.2201	-2.0078	0.0564061	0.402903	-4.06986
ABHD8	0.171977	10.954	2.00756	0.0564338	0.402903	-4.07025
FARSA	0.233146	10.2514	2.00728	0.0564658	0.40291	-4.0707
C6orf163	0.143971	7.82222	2.00663	0.0565399	0.402952	-4.07175
C1orf53	-0.258267	10.2423	-2.00648	0.0565571	0.402952	-4.072
KRTAP10-11	0.131172	8.03756	2.00641	0.056565	0.402952	-4.07211
COX6C	-0.137347	13.8324	-2.00557	0.0566606	0.403109	-4.07346
FOXN2	-0.146475	10.8356	-2.0054	0.0566795	0.403109	-4.07373
ING2	-0.147758	10.988	-2.00508	0.0567165	0.403109	-4.07425
LPIN1	0.189526	11.9005	2.00504	0.0567212	0.403109	-4.07432
SNX14	-0.119319	7.76654	-2.00461	0.0567696	0.403109	-4.075
ZNF185	0.200159	11.8494	2.00458	0.0567737	0.403109	-4.07506
RPL23AP53	-0.192331	8.99182	-2.00392	0.0568487	0.403333	-4.07611
FNBP1L	0.651185	7.89296	2.00375	0.0568685	0.403333	-4.07639
CFH	-0.188214	8.7573	-2.00348	0.0568987	0.403333	-4.07682
CIAO1	0.413992	11.5817	2.00301	0.0569534	0.4035	-4.07758
LOC728903	0.217634	12.4626	2.00244	0.0570177	0.403735	-4.07849
ZFR	-0.172342	11.2797	-2.00208	0.05706	0.403814	-4.07908
RAB4B	0.205107	9.35632	2.00176	0.0570957	0.403846	-4.07958
SEPHS2	-0.15263	10.0116	-2.00131	0.0571484	0.403998	-4.08032
IDE	-0.210789	8.63727	-2.00084	0.0572019	0.404047	-4.08107
F8	-0.153921	8.20671	-2.00019	0.0572762	0.404047	-4.0821
PSMB8	0.780142	9.02732	2.00019	0.0572766	0.404047	-4.08211
FEZ1	0.134605	8.28345	2.00007	0.05729	0.404047	-4.0823
ZMYND12	-0.164299	8.58636	-1.99989	0.0573112	0.404047	-4.08259
SF1	0.348795	9.38742	1.99962	0.0573424	0.404047	-4.08303
CHN2	-0.225294	9.22755	-1.999	0.0574134	0.404327	-4.08402
VPS26A	-0.274708	9.05166	-1.99842	0.0574803	0.404477	-4.08495
MLF1	-0.220461	8.4609	-1.99788	0.057543	0.404477	-4.08582
FAM86DP	-0.152987	8.17613	-1.99773	0.0575604	0.404477	-4.08606
IGF2R	0.175138	11.8648	1.99772	0.0575622	0.404477	-4.08609
RAP1GAP2	0.346944	10.1919	1.99724	0.0576177	0.404477	-4.08686
LIMD1	0.159134	7.46425	1.9972	0.0576219	0.404477	-4.08692
PLD1	-0.188898	9.07371	-1.99684	0.057663	0.404532	-4.08749
CEP120	-0.167935	8.45711	-1.99654	0.057698	0.404532	-4.08797
SMNDC1	-0.232572	10.3296	-1.99632	0.0577233	0.404532	-4.08832
MAEA	0.188789	8.88161	1.99549	0.0578201	0.404677	-4.08966
ATXN2L	0.237221	9.14149	1.99547	0.0578223	0.404677	-4.08969
CEP57	-0.194773	9.03891	-1.99476	0.0579054	0.404677	-4.09084
LMBR1L	0.179582	7.93483	1.99462	0.0579213	0.404677	-4.09106
HNRNPDL	-0.786261	11.0731	-1.99432	0.0579557	0.404677	-4.09153
CCDC124	0.231817	10.0897	1.99431	0.0579569	0.404677	-4.09155
RANGAP1	0.199855	12.5643	1.99411	0.0579804	0.404677	-4.09187
NDUFC1	-0.112495	10.2958	-1.99399	0.0579939	0.404677	-4.09206
FCGRT	-0.223664	10.6719	-1.99291	0.05812	0.405339	-4.0938
GEMIN4	0.135447	12.1635	1.99251	0.0581672	0.405449	-4.09444
TMEM131	0.196756	12.2871	1.99171	0.0582602	0.405715	-4.09572
VCL	1.71524	11.7461	1.99127	0.0583118	0.405715	-4.09643
RGS10	0.142994	12.8365	1.99118	0.0583225	0.405715	-4.09657
GLIPR2	-0.160485	10.0937	-1.99096	0.0583486	0.405715	-4.09693
RLF	-0.163151	9.62726	-1.99084	0.0583618	0.405715	-4.09711
CD79A	0.189594	8.02631	1.99013	0.0584455	0.406078	-4.09826
BRD4	0.308543	8.59076	1.98934	0.0585385	0.406507	-4.09953
SLC2A6	0.206026	8.94451	1.9886	0.0586253	0.406892	-4.10071
MOB1A	0.305677	9.9268	1.98746	0.0587591	0.406954	-4.10253
DAXX	0.152631	9.52484	1.98738	0.0587685	0.406954	-4.10266
SPANXA1	-0.246174	13.307	-1.98733	0.0587744	0.406954	-4.10274
OSR1	0.208509	9.51849	1.98696	0.0588181	0.406954	-4.10333
NDUFS4	-0.134124	12.7775	-1.98661	0.0588587	0.406954	-4.10388
SUSD1	-0.127545	9.06401	-1.98656	0.0588649	0.406954	-4.10397
CILP	0.145101	7.7897	1.98645	0.058878	0.406954	-4.10415
RANGRF	-0.166688	7.80172	-1.98632	0.0588931	0.406954	-4.10435
SAMD9	-0.185516	10.218	-1.98608	0.0589218	0.406954	-4.10474
GABARAPL1	-0.146565	9.96205	-1.98564	0.0589733	0.406954	-4.10544
DDX18	-0.126484	11.7708	-1.98559	0.0589798	0.406954	-4.10553
SERBP1	-0.207919	11.1	-1.98196	0.0594098	0.40961	-4.11132
TSKU	-0.168194	9.92076	-1.98181	0.0594279	0.40961	-4.11157
TNFRSF19	-0.178189	9.98464	-1.98153	0.0594615	0.409623	-4.11202
LINC00518	0.155695	7.9149	1.98061	0.0595709	0.409761	-4.11349
RGS14	0.134505	7.56894	1.98036	0.0596002	0.409761	-4.11388
CIZ1	0.136822	8.1643	1.98031	0.0596059	0.409761	-4.11395
SEMA6B	0.21433	8.78568	1.98019	0.0596203	0.409761	-4.11415
SNORD10	-0.188696	8.15308	-1.97919	0.0597396	0.409761	-4.11574
MIER2	0.228768	9.17451	1.97918	0.059741	0.409761	-4.11576
HCN4	0.258296	7.7979	1.97866	0.0598036	0.409761	-4.1166
TMEM25	-0.19169	8.07421	-1.97807	0.0598738	0.409761	-4.11753
IFNLR1	-0.149594	7.66194	-1.97806	0.0598748	0.409761	-4.11755
EID1	-0.16979	8.69306	-1.97801	0.0598807	0.409761	-4.11762
ZNF462	-0.160223	10.5393	-1.97775	0.0599125	0.409761	-4.11805
NCAPD3	0.158526	10.1658	1.97759	0.0599314	0.409761	-4.1183
SERPINB7	0.229298	8.59909	1.97755	0.0599361	0.409761	-4.11836
XYLT2	0.147955	10.9493	1.97723	0.0599741	0.409761	-4.11887
NCKAP1	-0.410999	9.47254	-1.97672	0.060036	0.409761	-4.11969
GPN1	-0.147364	12.0777	-1.97657	0.0600535	0.409761	-4.11992
CCT7	0.122863	13.7854	1.97614	0.0601051	0.409761	-4.12061
CEL	0.270312	8.86271	1.97593	0.0601306	0.409761	-4.12095
URB1-AS1	-0.16708	8.21734	-1.97588	0.0601362	0.409761	-4.12102
SNRPB	0.130543	13.5322	1.97562	0.0601675	0.409761	-4.12143
UBE2L3	-0.467728	7.87716	-1.97557	0.0601741	0.409761	-4.12152
CYP2U1	-0.173346	9.12109	-1.97549	0.0601834	0.409761	-4.12165
ASCC2	0.149979	11.2414	1.97508	0.0602334	0.409761	-4.12231
KIAA1683	0.280001	7.89999	1.97502	0.0602403	0.409761	-4.1224
KHSRP	0.183664	11.5727	1.97436	0.06032	0.410087	-4.12345
ST3GAL1	0.220066	9.08721	1.97347	0.0604265	0.410385	-4.12486
UPK1A	0.215212	7.78312	1.97316	0.0604642	0.410385	-4.12536
MAGED1	-0.145108	12.5022	-1.97298	0.0604859	0.410385	-4.12564
WT1	-0.142215	7.80332	-1.97294	0.0604904	0.410385	-4.1257
ZC3H12C	-0.159026	10.3609	-1.97161	0.0606519	0.410582	-4.12783
FAM104A	-0.160429	11.3667	-1.97159	0.0606541	0.410582	-4.12786
PPID	0.200573	7.85285	1.97157	0.060657	0.410582	-4.1279
PFDN4	-0.246378	9.01497	-1.97123	0.0606975	0.410582	-4.12843
EXOC3	0.251461	9.61232	1.97119	0.060702	0.410582	-4.12849
FGF23	0.138831	8.06141	1.97113	0.0607097	0.410582	-4.12859
PTBP2	-0.217552	9.61042	-1.97047	0.0607904	0.410729	-4.12965
TTL	0.172296	11.1888	1.97043	0.0607948	0.410729	-4.1297
MYO5C	0.215113	11.2513	1.96983	0.0608681	0.410851	-4.13066
FRAT2	0.178785	9.96632	1.96974	0.0608782	0.410851	-4.1308
LUZP2	0.181696	7.73733	1.9695	0.0609079	0.410851	-4.13119
PTGFRN	-0.133642	7.68496	-1.96907	0.0609597	0.410986	-4.13186
BCL7C	0.201654	10.3137	1.96867	0.0610082	0.411099	-4.1325
SLC12A6	-0.150562	8.24874	-1.96717	0.0611914	0.411318	-4.13489
LSM4	0.178688	12.3992	1.96711	0.0611994	0.411318	-4.13499
ESM1	0.374419	12.1407	1.96695	0.0612181	0.411318	-4.13523
TRIM63	-0.157828	7.80361	-1.96676	0.0612419	0.411318	-4.13554
ACTG2	-0.210477	7.55161	-1.96673	0.0612455	0.411318	-4.13559
GTF2IRD1	-0.163136	8.83993	-1.96667	0.0612524	0.411318	-4.13568
LINC00174	0.249274	8.6445	1.96659	0.0612629	0.411318	-4.13582
NCOA5	0.202236	10.347	1.96592	0.0613439	0.411402	-4.13687
MAPK13	0.244629	11.4005	1.96521	0.0614315	0.411402	-4.13801
SH2B2	0.184451	7.71614	1.96518	0.0614347	0.411402	-4.13805
OSBPL10	-0.162101	11.7852	-1.96487	0.061473	0.411402	-4.13854
CELF2-AS2	-0.132464	7.71373	-1.96466	0.0614981	0.411402	-4.13887
PPIC	-0.149565	11.175	-1.96464	0.0615015	0.411402	-4.13891
G6PC3	0.161647	10.6236	1.96449	0.0615196	0.411402	-4.13915
RNF123	0.131493	10.1975	1.96432	0.0615408	0.411402	-4.13942
ENTPD4	0.215861	9.14447	1.96353	0.0616368	0.411402	-4.14066
ATXN7L3B	0.142999	11.1089	1.96352	0.0616388	0.411402	-4.14069
EI24	0.12414	12.6748	1.96351	0.0616392	0.411402	-4.14069
CYP2J2	-0.196714	9.21911	-1.96337	0.0616564	0.411402	-4.14092
KANK2	0.187075	10.0332	1.96279	0.0617284	0.411671	-4.14185
CD46	-0.245439	8.78364	-1.96231	0.0617878	0.411855	-4.14261
G6PD	0.203443	9.4665	1.96064	0.0619934	0.412831	-4.14526
SNORA11D	0.144998	10.1633	1.9606	0.0619979	0.412831	-4.14531
TRIL	-0.238298	8.20986	-1.95975	0.0621034	0.413042	-4.14667
CFAP20	0.199061	11.5139	1.95959	0.062123	0.413042	-4.14692
CABLES2	-0.169709	9.10467	-1.95921	0.0621695	0.413042	-4.14751
RPS7	-0.353504	10.6446	-1.95917	0.0621746	0.413042	-4.14758
SAP30	-0.187853	10.4952	-1.95906	0.062189	0.413042	-4.14776
CCDC101	0.224815	8.65838	1.95828	0.0622848	0.413466	-4.14899
RHBDL1	0.237135	8.58492	1.95783	0.0623409	0.413572	-4.14971
RBL2	-0.175844	10.7634	-1.95741	0.0623926	0.413572	-4.15037
SEC62	-0.170289	9.16197	-1.95683	0.0624654	0.413572	-4.15129
PRKX	0.159397	8.52483	1.95677	0.062473	0.413572	-4.15139
EP400	0.168269	10.3781	1.95664	0.0624881	0.413572	-4.15158
ZFAND2B	0.172851	10.4467	1.95596	0.0625729	0.413572	-4.15266
SNORA45B	-0.145572	9.05212	-1.95594	0.0625757	0.413572	-4.1527
FBXO17	0.238422	8.56811	1.95589	0.0625816	0.413572	-4.15277
LAMTOR5	-0.153495	12.622	-1.95584	0.062588	0.413572	-4.15285
SPRY1	-0.58694	10.5059	-1.95495	0.0626997	0.413668	-4.15427
ATP9A	-0.314289	9.62078	-1.9547	0.0627304	0.413668	-4.15466
NEDD4L	0.163722	11.2507	1.95459	0.062744	0.413668	-4.15483
TMEM199	-0.135881	9.67721	-1.95457	0.0627465	0.413668	-4.15487
MBTPS2	-0.232552	8.947	-1.95436	0.0627724	0.413668	-4.1552
DNAL1	-0.233936	9.12956	-1.95419	0.062794	0.413668	-4.15547
GREB1	0.28762	7.87807	1.95332	0.0629028	0.414174	-4.15685
SNX22	0.196738	8.79287	1.95283	0.0629645	0.414323	-4.15763
SNORA68	-0.175589	7.91948	-1.95229	0.063032	0.414323	-4.15848
LLGL1	0.259018	11.4375	1.95211	0.0630544	0.414323	-4.15876
CCDC13	0.161314	7.67607	1.95196	0.063073	0.414323	-4.159
RAB33B	-0.267841	8.58774	-1.95186	0.0630853	0.414323	-4.15915
PPP1R35	0.13426	10.5998	1.95137	0.0631467	0.414422	-4.15992
LINC01102	-0.205312	7.76236	-1.95105	0.0631865	0.414422	-4.16043
PLSCR3	0.1842	12.9451	1.95083	0.0632143	0.414422	-4.16078
COX6A1	-0.131288	12.8646	-1.95072	0.0632284	0.414422	-4.16095
NPAS2	0.187473	9.85817	1.94989	0.0633328	0.414897	-4.16226
KIFC2	0.284917	10.5404	1.94962	0.0633669	0.414899	-4.16269
VDAC1	0.155355	13.4156	1.94933	0.0634029	0.414899	-4.16314
DOPEY2	-0.151264	8.4274	-1.94903	0.0634405	0.414899	-4.16362
PRR5	0.206915	7.88651	1.94823	0.0635419	0.414899	-4.16489
RPL39	-0.119647	14.6628	-1.94797	0.0635752	0.414899	-4.1653
CMTM7	0.194975	9.28714	1.94784	0.063591	0.414899	-4.1655
AXIN2	-0.186918	9.23293	-1.9478	0.0635961	0.414899	-4.16556
TIMM10B	0.186082	8.91923	1.94767	0.063613	0.414899	-4.16577
OPRL1	-0.170833	8.86827	-1.9476	0.0636212	0.414899	-4.16588
SETD8	0.136947	10.2821	1.94674	0.0637301	0.415292	-4.16724
CCDC9	0.196063	7.86185	1.9466	0.063748	0.415292	-4.16746
L3MBTL1	0.234474	8.65503	1.94625	0.0637928	0.415292	-4.16802
SNTB1	-0.16935	7.91307	-1.94605	0.0638175	0.415292	-4.16833
CHPF2	0.180696	9.02739	1.94586	0.0638418	0.415292	-4.16863
SPRED1	-0.156322	11.8828	-1.94511	0.0639372	0.415449	-4.16982
DIDO1	0.176615	9.32626	1.94507	0.0639417	0.415449	-4.16987
CLPTM1	0.17473	11.1506	1.94476	0.0639817	0.415449	-4.17037
MIR1253	-0.126131	8.03848	-1.94452	0.0640117	0.415449	-4.17074
CCDC84	0.182103	10.9683	1.94416	0.0640569	0.415449	-4.1713
TRMT2A	0.174844	8.09679	1.94361	0.0641273	0.415449	-4.17217
[truncated: 10,960 more rows]

## Sheet: miR302b+Cis vs miR302b
ST1: Gene expresion profiles of in-vivo assay evalauted by microarray analysis
Gene	logFC	AveExpr	t	P.Value	adj.P.Val	B
FAP	-0.672384	8.84676	-6.81401	5.61585e-07	0.00727702	5.88634
ULK3	0.593957	8.42332	5.99728	3.88531e-06	0.0145079	4.22579
PBLD	0.677211	7.71613	5.52173	1.23846e-05	0.0267466	3.21564
DCLK1	-0.503372	8.45155	-5.38401	1.7391e-05	0.0297555	2.91805
CAPRIN1	0.628187	9.12122	5.10226	3.49793e-05	0.0323059	2.30338
SNORD100	-0.508457	8.26547	-5.08989	3.60736e-05	0.0323059	2.27622
CKB	0.570833	10.3136	5.07542	3.73968e-05	0.0323059	2.24446
CTH	-0.62517	8.88558	-4.99318	4.59072e-05	0.0349166	2.06355
KCND3	0.657339	7.97018	4.94434	5.18583e-05	0.0349166	1.95591
DYRK1A	-1.0151	9.90386	-4.90728	5.68894e-05	0.0349166	1.8741
RAB6B	0.660483	7.89632	4.78573	7.71019e-05	0.040069	1.60525
EXOC1	1.38436	9.4659	4.60632	0.000120867	0.0487956	1.20707
ALYREF	0.510357	10.0162	4.55225	0.00013842	0.051247	1.08684
ZMIZ2	-1.39584	9.16867	-4.48176	0.000165192	0.0563306	0.930004
ISG15	0.732423	12.2351	4.43533	0.0001856	0.0581855	0.826646
IL7R	0.648248	8.39536	4.32099	0.000247245	0.0641	0.572068
HNRNPH2	-0.505585	8.59435	-4.31443	0.000251346	0.0641	0.55746
CASC15	-0.527345	8.44139	-4.27849	0.000275039	0.0641	0.477469
IRX6	0.649137	8.4075	4.24606	0.000298331	0.0641	0.405275
C7orf55	1.6018	10.2457	4.04101	0.000498359	0.0807217	-0.0504979
DAPK3	0.540105	9.52059	4.01205	0.000535725	0.0817915	-0.114717
PDK4	-0.614022	8.61891	-3.97274	0.000590943	0.0835703	-0.201844
IFIT2	0.677288	10.8158	3.95916	0.000611289	0.085173	-0.231908
ARHGAP9	0.578903	8.78907	3.91585	0.000680964	0.0860075	-0.327761
MRTO4	0.582113	10.2639	3.91223	0.000687122	0.0860075	-0.335755
PCDHB10	-0.523455	8.36618	-3.86123	0.000780091	0.0893466	-0.448423
DMBT1	0.656013	8.17284	3.85615	0.00079	0.0893466	-0.459628
HSD17B11	-1.90176	10.627	-3.80844	0.000889408	0.0893466	-0.564831
HIST2H2AA4	0.543196	11.075	3.72263	0.00110016	0.0893466	-0.753504
CCNG2	-0.507504	9.38253	-3.716	0.00111833	0.0893466	-0.768034
FAM127C	0.978666	9.48764	3.7154	0.00112	0.0893466	-0.769354
RNF39	0.561053	7.63493	3.69003	0.0011925	0.0896052	-0.824976
VWA7	0.510373	7.79945	3.63402	0.00136924	0.093565	-0.94749
KRT17	0.597829	8.47628	3.63323	0.00137192	0.093565	-0.949224
XCR1	0.606071	8.22008	3.59887	0.00149303	0.0972163	-1.02418
SIAH1	1.29598	8.84655	3.5747	0.00158447	0.0990323	-1.07683
MGLL	0.514588	9.82524	3.55445	0.00166528	0.0991207	-1.12088
NET1	-2.51889	11.1567	-3.55084	0.0016801	0.0991207	-1.12872
BZW1	-0.550911	9.33426	-3.52424	0.00179337	0.0997501	-1.18648
H3F3AP4	-2.05344	13.2101	-3.51578	0.00183093	0.100531	-1.20482
COL2A1	0.505973	7.4663	3.4891	0.00195449	0.102646	-1.2626
STAT3	1.25113	10.296	3.46905	0.00205272	0.103952	-1.30597
HIST2H2AC	0.518488	10.6771	3.44492	0.00217726	0.106064	-1.35806
ELMSAN1	-0.823503	8.76505	-3.41015	0.00236986	0.10775	-1.43297
IL16	0.770949	8.35962	3.35955	0.00268001	0.111436	-1.54159
IDO2	0.546275	8.30663	3.35656	0.00269952	0.111436	-1.54799
TSPAN17	1.34	10.4806	3.35631	0.00270118	0.111436	-1.54853
C19orf48	0.854552	11.4816	3.33823	0.00282223	0.113209	-1.58722
ERGIC1	0.541076	9.24485	3.31597	0.0029785	0.113209	-1.63477
NCKAP1	-0.72107	9.47254	-3.30663	0.00304657	0.113209	-1.65469
USH1G	0.780102	8.93245	3.30192	0.00308147	0.113209	-1.66474
CPE	-0.603862	8.9143	-3.30115	0.0030872	0.113209	-1.66638
MRPL55	-1.30169	9.30036	-3.29954	0.0030992	0.113209	-1.6698
PIAS2	1.41436	9.06598	3.22851	0.00367793	0.115287	-1.82064
AUTS2	0.513613	7.99759	3.2164	0.00378653	0.116263	-1.84625
HSPA7	-0.973168	9.79701	-3.20238	0.00391612	0.118287	-1.87586
IL1RN	0.560952	7.42872	3.19018	0.00403231	0.118912	-1.90159
SCAMP1	-0.51246	8.80819	-3.1869	0.00406419	0.118912	-1.90851
S100A1	0.530693	7.96643	3.18559	0.00407699	0.118912	-1.91128
RARRES3	0.609126	9.47631	3.17901	0.00414174	0.119796	-1.92513
NMD3	-0.689982	10.3227	-3.17769	0.00415482	0.11986	-1.92791
C11orf54	0.507297	9.1343	3.16839	0.00424836	0.120795	-1.94748
ACYP1	1.37978	8.34906	3.14357	0.00450788	0.120795	-1.99959
HOXC6	1.24008	8.51956	3.10994	0.00488422	0.121245	-2.07
LEO1	1.07792	8.859	3.09419	0.00507056	0.122584	-2.10286
HNRNPDL	-1.27368	11.0731	-3.0803	0.00524068	0.123246	-2.1318
C17orf58	-0.509819	10.4181	-3.07094	0.00535843	0.12449	-2.15129
PLIN2	0.872527	11.8454	3.07023	0.00536744	0.12449	-2.15276
EEF1B2	1.14323	8.61775	3.03195	0.00587652	0.126831	-2.23216
AKAP11	0.835863	8.69712	3.0232	0.00599933	0.127705	-2.25027
TCEAL8	-0.51179	11.0274	-3.0207	0.0060348	0.127819	-2.25544
SPCS3	-0.713718	10.198	-2.99943	0.00634524	0.131234	-2.29934
PLEKHA2	-1.25479	8.90116	-2.9795	0.00664997	0.133151	-2.34036
GTF3C2	0.979352	10.3164	2.94068	0.00728405	0.135709	-2.41993
IL11	0.564472	8.78907	2.91588	0.00771898	0.138344	-2.47055
DNASE1L1	0.664166	9.61345	2.89472	0.00810958	0.140723	-2.5136
FOS	-0.542561	9.65225	-2.888	0.00823752	0.14138	-2.52724
LARP7	-0.757619	9.97806	-2.827	0.00948986	0.148974	-2.65043
RPL8	3.24425	11.4911	2.80722	0.00993338	0.151968	-2.69013
AASDHPPT	-1.04485	11.0849	-2.78844	0.0103726	0.154139	-2.7277
FAM65C	0.505272	7.77289	2.77136	0.0107882	0.15575	-2.76179
OSGIN1	-0.880959	9.26569	-2.73644	0.011687	0.159496	-2.83115
AGAP6	0.758518	9.76505	2.73533	0.0117165	0.159496	-2.83333
TOX2	0.796268	9.18273	2.7208	0.012112	0.160777	-2.86207
ETF1	-1.7053	10.6886	-2.67378	0.0134794	0.168115	-2.95454
CENPA	0.714475	10.4634	2.66514	0.013746	0.168524	-2.97145
ASCC3	0.698913	9.58428	2.65224	0.0141534	0.16946	-2.99665
ATP5D	1.5234	11.5384	2.64974	0.0142336	0.16946	-3.00152
SPARCL1	-0.651508	11.281	-2.64266	0.0144633	0.170533	-3.01532
DNM2	0.698227	9.58671	2.62865	0.0149275	0.172552	-3.04255
CAT	-1.07744	10.0941	-2.6047	0.0157543	0.176595	-3.08896
METTL17	0.665301	9.66802	2.60163	0.0158632	0.176866	-3.09489
CCPG1	1.25247	8.56188	2.59818	0.0159867	0.177056	-3.10156
SLC39A6	-0.62344	10.2094	-2.59116	0.0162404	0.177133	-3.1151
HSPA1A	-0.627044	11.8901	-2.56061	0.0173891	0.181111	-3.17381
ZNF598	0.705878	9.31712	2.55639	0.0175534	0.181111	-3.18188
UFM1	-0.587784	9.65147	-2.54462	0.01802	0.183011	-3.20438
TCF20	-0.904638	8.73915	-2.52205	0.0189472	0.184726	-3.24738
CBLL1	0.761143	9.57799	2.51718	0.019153	0.185794	-3.25663
OASL	-0.706233	8.95903	-2.50469	0.0196903	0.188023	-3.2803
RRBP1	1.17776	10.0199	2.48902	0.0203842	0.19088	-3.30992
XPR1	0.679343	8.58322	2.46328	0.0215737	0.193704	-3.35835
SLC44A1	-1.3797	10.7138	-2.46143	0.0216616	0.193847	-3.36182
CCDC90B	-0.92509	9.68872	-2.45617	0.0219135	0.195232	-3.37169
VN1R2	0.5424	8.23472	2.45159	0.0221349	0.196114	-3.38026
LAMC2	1.1261	9.83693	2.44585	0.0224154	0.197055	-3.39099
HBA2	0.566076	7.94078	2.41435	0.0240137	0.201274	-3.44964
BTG3	-1.06002	10.0933	-2.41263	0.0241039	0.201639	-3.45283
RYK	-0.920964	10.4393	-2.41018	0.0242334	0.202238	-3.45738
LTB4R	0.51764	9.86955	2.35249	0.0274635	0.212176	-3.56356
NAV2	0.650631	10.0092	2.33573	0.0284734	0.216219	-3.59413
IFI44L	-0.521678	9.51546	-2.31893	0.0295195	0.218473	-3.62462
G3BP2	-0.965779	11.1763	-2.3125	0.0299293	0.219274	-3.63626
HNRNPU	-0.922502	10.0987	-2.30323	0.0305296	0.220079	-3.65302
EFEMP1	0.63875	9.31231	2.29967	0.030763	0.220724	-3.65945
SEZ6L2	-0.575521	9.41605	-2.29721	0.030925	0.220891	-3.66388
PPP2CB	0.784843	9.18116	2.29028	0.031386	0.221793	-3.67635
ID3	-0.741591	8.70058	-2.28898	0.031473	0.221886	-3.67869
MIR877	0.57083	8.6097	2.26862	0.0328674	0.22606	-3.71519
MPZL1	0.90586	9.0416	2.2623	0.0333119	0.22684	-3.72649
DHX30	0.832748	10.8018	2.24958	0.0342223	0.22761	-3.74915
MBNL1	0.962301	8.02054	2.22958	0.0357004	0.231914	-3.78464
SNORD3D	-0.626442	11.3392	-2.22497	0.0360489	0.232746	-3.79279
FGFRL1	0.617149	9.18614	2.21054	0.037161	0.236926	-3.81825
OPA1	1.2341	9.04911	2.17515	0.0400197	0.244401	-3.8802
ARPP19	-0.70422	11.022	-2.16102	0.0412159	0.247144	-3.90477
MRPL43	-1.08943	8.91867	-2.15472	0.0417597	0.248563	-3.91569
ZNF473	-0.543018	9.59185	-2.14395	0.0427044	0.25038	-3.93432
TWSG1	-1.22235	11.0075	-2.13679	0.0433424	0.251333	-3.94665
TSNAX	0.824928	9.20826	2.13406	0.0435884	0.251372	-3.95136
RNU5A-1	-0.525827	8.00301	-2.12765	0.0441694	0.252581	-3.96237
PSMB9	-0.850699	9.13295	-2.10077	0.046686	0.258418	-4.00835

## Sheet: Control+Cis vs Control
ST1: Gene expresion profiles of in-vivo assay evalauted by microarray analysis
Gene	logFC	AveExpr	t	P.Value	adj.P.Val	B
GBP4	0.709278	8.39844	7.0796	3.04686e-07	0.00394812	6.23939
HLA-B	0.545782	13.1045	6.64153	8.39363e-07	0.00543823	5.40539
KRT17	0.94494	8.47628	6.02304	3.65108e-06	0.0157702	4.17539
CSF2	0.806919	10.5352	5.76668	6.79811e-06	0.0184294	3.64894
UHRF2	-0.474826	10.2209	-5.68889	8.21986e-06	0.0184294	3.48742
UBD	0.61321	7.92074	5.67358	8.53344e-06	0.0184294	3.45554
DCLK1	-0.487581	8.45155	-5.46965	1.40787e-05	0.0260616	3.02816
VASN	0.602563	9.46932	5.35721	1.85817e-05	0.028919	2.79042
SERINC2	0.392593	8.24281	5.32575	2.00857e-05	0.028919	2.72364
LOXL4	0.517261	8.56088	5.25788	2.37629e-05	0.0307919	2.57926
IL7R	0.726975	8.39536	5.08226	3.67652e-05	0.0433094	2.20354
SERPINA1	0.570071	9.49296	5.03653	4.12019e-05	0.0444912	2.10526
FMNL1	-0.367789	8.42683	-4.90478	5.72461e-05	0.0531208	1.82112
TAP1	0.403159	11.9988	4.90376	5.73924e-05	0.0531208	1.81892
MAL2	0.422971	7.61921	4.80761	7.29939e-05	0.0581081	1.61079
EDNRB	-0.376059	9.3859	-4.80485	7.34993e-05	0.0581081	1.60481
ARNT2	0.46901	8.16674	4.79026	7.62338e-05	0.0581081	1.57317
HIST2H4A	0.434953	8.91285	4.73686	8.71388e-05	0.0596659	1.45729
FBP1	0.508735	8.82167	4.73362	8.78497e-05	0.0596659	1.45025
BMP2	-0.491888	10.5762	-4.70379	9.46674e-05	0.0596659	1.38543
EFNA1	0.497629	8.77541	4.68175	0.000100041	0.0596659	1.33753
ARHGEF5	0.312865	7.78569	4.67676	0.0001013	0.0596659	1.32668
NOV	0.400557	10.3885	4.63396	0.000112774	0.0635358	1.23355
GDF15	0.314484	8.24405	4.58547	0.000127355	0.0668281	1.12795
KRT14	0.74677	8.05717	4.57003	0.000132384	0.0668281	1.09431
OASL	-1.22724	8.95903	-4.56492	0.000134089	0.0668281	1.08319
CARD8	-0.34652	10.2902	-4.52357	0.000148746	0.0676019	0.99304
CD24	0.759359	9.68234	4.50969	0.000154015	0.0676019	0.962777
PLXNA2	-0.458047	9.27616	-4.5069	0.000155097	0.0676019	0.956691
CEBPD	0.455325	10.2849	4.50329	0.00015651	0.0676019	0.948807
CD14	0.357164	8.64352	4.4533	0.000177417	0.0741605	0.839765
PLEKHA2	-1.78166	8.90116	-4.43706	0.000184797	0.0748314	0.804311
CDC42EP5	0.506039	8.78694	4.41872	0.000193496	0.0759796	0.764288
HERC5	0.424377	11.8521	4.38926	0.000208339	0.0794017	0.699969
PREP	-0.281577	10.4161	-4.35257	0.00022842	0.0845677	0.619865
C1QTNF5	0.283791	7.84474	4.32011	0.000247788	0.08919	0.548999
AFF3	-0.412621	10.281	-4.29038	0.000266962	0.09056	0.484088
C4BPB	0.440966	8.66868	4.28487	0.000270679	0.09056	0.472042
CH25H	0.538096	8.35788	4.27804	0.00027535	0.09056	0.457138
IL6	0.576961	9.16463	4.26318	0.000285802	0.09056	0.424683
CLMP	-0.389215	9.47331	-4.26215	0.000286538	0.09056	0.422443
CEACAM1	0.450011	7.64812	4.19871	0.000335905	0.102591	0.283936
PLCG2	0.570638	9.1388	4.18312	0.000349276	0.102591	0.249918
IFIT2	0.680495	10.8158	4.17206	0.00035908	0.102591	0.22579
TNFSF10	0.641261	9.10457	4.16085	0.0003693	0.102591	0.201328
IGFBP6	0.523854	10.9917	4.15876	0.000371238	0.102591	0.196767
CLIC3	0.489859	8.30077	4.15783	0.000372108	0.102591	0.194726
FAP	-0.39018	8.84676	-4.14713	0.000382209	0.103181	0.171379
ISG15	0.648615	12.2351	4.11953	0.000409539	0.106903	0.111172
PLK2	0.525069	8.96847	4.11665	0.000412499	0.106903	0.104893
ADTRP	-0.570927	10.7261	-4.08977	0.000441184	0.108941	0.0462803
HERC6	0.589165	10.1889	4.08919	0.000441822	0.108941	0.0450212
HSPA5	0.278399	11.0074	4.08061	0.000451396	0.108941	0.0263287
REP15	-0.293257	8.01731	-4.07832	0.000453989	0.108941	0.0213343
FCGRT	0.455852	10.6719	4.06177	0.000473165	0.111478	-0.0147389
RARRES3	0.740467	9.47631	4.05309	0.000483538	0.111887	-0.0336471
SELM	0.509912	9.5056	4.02371	0.000520363	0.118296	-0.0976493
CXCL1	0.596436	10.1206	3.99962	0.000552613	0.123461	-0.150086
HNRNPA1P10	-0.312583	11.5552	-3.99253	0.000562479	0.123536	-0.165518
ABCC3	-1.71332	8.68848	-3.96866	0.000596984	0.127234	-0.217437
PLAT	0.475875	11.9137	3.96734	0.000598958	0.127234	-0.220316
MUC1	0.576052	9.0285	3.95251	0.000621516	0.129208	-0.252557
RRAD	0.587394	8.62865	3.94822	0.000628193	0.129208	-0.261877
C10orf35	0.393921	8.80415	3.93575	0.000648034	0.131207	-0.288995
CBX6	-0.430186	11.1688	-3.92694	0.000662407	0.132053	-0.308125
LPIN1	-0.370112	11.9005	-3.9155	0.00068156	0.132996	-0.332983
ASNS	-0.357267	11.8409	-3.90724	0.000695712	0.132996	-0.350906
CPA4	0.379498	8.50826	3.89723	0.000713273	0.132996	-0.372646
ADAP1	0.336789	8.9897	3.89215	0.00072234	0.132996	-0.38366
GPR17	-0.311089	8.19266	-3.88837	0.000729177	0.132996	-0.391876
ST3GAL5	0.286667	8.47341	3.886	0.000733493	0.132996	-0.397023
PRG2	0.393443	8.0345	3.883	0.000738981	0.132996	-0.403523
DMKN	0.255216	7.77344	3.85673	0.000788867	0.140029	-0.460489
DMBT1	0.620244	8.17284	3.82385	0.000856024	0.147226	-0.531731
ATF3	0.429509	9.22314	3.82019	0.00086383	0.147226	-0.539647
PCNA	-0.296214	8.46191	-3.81979	0.000864698	0.147226	-0.540522
CLDN1	0.534239	8.72877	3.81333	0.000878686	0.147226	-0.554514
TPD52L1	0.334225	8.10579	3.80989	0.000886219	0.147226	-0.561958
PI16	0.504989	8.03713	3.80208	0.00090356	0.148095	-0.578854
BAG5	-1.36186	10.3227	-3.79007	0.000930883	0.148095	-0.604828
NFKBIE	0.286607	9.31435	3.7876	0.000936599	0.148095	-0.610164
RTP4	0.304212	7.79355	3.78736	0.000937164	0.148095	-0.610691
CLPSL2	0.292827	7.51787	3.77542	0.000965312	0.150705	-0.636491
SEL1L3	0.41317	8.66013	3.76866	0.000981627	0.150754	-0.651102
CDS1	0.305143	8.22465	3.76569	0.000988895	0.150754	-0.657534
IL32	0.666464	9.42311	3.73563	0.0010653	0.160514	-0.722415
TP63	0.293375	8.09016	3.72418	0.00109592	0.16323	-0.747113
DTNA	0.273802	8.69389	3.71722	0.00111497	0.16418	-0.762135
PDCL3P4	0.304244	8.50908	3.70718	0.00114301	0.166417	-0.783778
CLIC6	0.299108	10.0103	3.69094	0.0011898	0.171167	-0.818746
PSMB8	-1.43745	9.02732	-3.68546	0.00120603	0.171167	-0.830553
APBB1IP	-0.328308	11.3486	-3.67927	0.00122461	0.171167	-0.843875
SH2B3	-0.371042	12.8334	-3.678	0.00122847	0.171167	-0.846615
BAMBI	0.336283	9.89649	3.64889	0.00131995	0.18012	-0.909196
SEMA6A	0.27853	7.96691	3.64871	0.00132053	0.18012	-0.90958
VCX3B	0.410581	8.02424	3.64403	0.00133588	0.180315	-0.919645
TSKU	0.308603	9.92076	3.63622	0.00136183	0.181924	-0.936411
MAP1LC3B	0.207189	10.8155	3.60767	0.00146106	0.193188	-0.997673
SNORA71C	0.325588	8.24492	3.59748	0.00149814	0.196089	-1.0195
NNMT	0.470492	10.2815	3.58805	0.00153329	0.198684	-1.0397
HLA-H	0.360953	13.6886	3.5594	0.00164515	0.211068	-1.10101
C15orf48	0.721188	9.54245	3.55264	0.00167268	0.212496	-1.11546
EBI3	0.291872	7.71655	3.53977	0.00172637	0.217187	-1.14295
MATN2	0.291112	8.04274	3.53526	0.00174555	0.217489	-1.15257
MYB	0.551099	9.04395	3.52808	0.00177656	0.219244	-1.1679
NCF2	0.514089	9.54341	3.52265	0.00180035	0.220084	-1.17947
ABI3	0.283883	8.00612	3.51399	0.00183897	0.220249	-1.19795
AIF1L	-1.55586	8.77361	-3.50724	0.00186962	0.220249	-1.21233
GSTO2	0.378236	8.40972	3.50416	0.00188377	0.220249	-1.21889
IRF1	0.379943	10.6613	3.49687	0.00191767	0.220249	-1.23441
EDN2	0.391673	7.96164	3.4958	0.00192274	0.220249	-1.23671
ZFAS1	0.303146	13.2631	3.4906	0.00194735	0.220249	-1.24777
DRAM1	0.281039	10.6068	3.48831	0.00195828	0.220249	-1.25264
HIST1H4H	0.457974	9.49252	3.48528	0.00197286	0.220249	-1.25909
CFL1	-0.188349	14.0057	-3.4839	0.0019795	0.220249	-1.26202
LCN1	-0.270525	7.85113	-3.48243	0.00198666	0.220249	-1.26516
HIST1H2BK	0.268258	13.8774	3.48202	0.00198866	0.220249	-1.26603
HIST1H2BD	0.426858	11.6332	3.45552	0.00212166	0.232582	-1.32234
PDE5A	0.328632	8.10506	3.45233	0.00213827	0.232582	-1.32912
NGF	0.327484	8.48428	3.44738	0.00216426	0.232582	-1.33962
SLC35F2	-0.203039	11.8186	-3.44595	0.00217182	0.232582	-1.34265
OLFML3	0.232092	7.87244	3.43582	0.00222613	0.236445	-1.36413
NPAS2	-0.329811	9.85817	-3.43034	0.00225607	0.23735	-1.37574
SUGT1P3	-0.215686	7.74656	-3.42528	0.0022841	0.23735	-1.38648
TOX2	0.955513	9.18273	3.42429	0.00228961	0.23735	-1.38857
SLC9A5	0.255114	7.93431	3.41484	0.00234291	0.240947	-1.40857
GBP2	0.392639	10.3385	3.41046	0.00236803	0.241614	-1.41784
POLA1	-0.321053	9.90995	-3.40419	0.00240445	0.243413	-1.43111
FAM46A	0.461076	10.5966	3.39941	0.00243258	0.244352	-1.44121
SRPX	-0.333809	12.6634	-3.38742	0.0025046	0.24965	-1.46656
HP1BP3	-0.307093	9.30299	-3.36092	0.0026711	0.264215	-1.52247
SH3KBP1	-0.291905	12.2768	-3.34365	0.00278534	0.272231	-1.55884
CYBA	0.200786	12.6328	3.33579	0.00283895	0.272231	-1.57539
HIST2H2AA3	0.607442	10.7419	3.33299	0.00285829	0.272231	-1.58128
KHDC1	0.277092	9.45874	3.33246	0.00286194	0.272231	-1.58239
SUCLA2	-0.301812	9.67125	-3.32789	0.00289379	0.272231	-1.592
HEY1	-0.396032	9.37891	-3.32778	0.00289458	0.272231	-1.59223
SLC1A4	-0.19543	8.13206	-3.32712	0.0028992	0.272231	-1.59362
EPSTI1	0.517889	8.80329	3.32075	0.00294422	0.272628	-1.60699
ITGB2	0.416461	10.7795	3.3191	0.00295601	0.272628	-1.61046
F12	0.306569	9.35764	3.3166	0.00297398	0.272628	-1.61572
GCNT1	0.272241	8.73947	3.31471	0.00298759	0.272628	-1.61968
KRT8	0.362651	11.275	3.30364	0.00306865	0.278067	-1.64291
ARL16	2.68489	10.8343	3.30005	0.00309541	0.278544	-1.65044
GPR37	0.31425	8.33232	3.29559	0.00312894	0.279406	-1.65979
DDX49	-0.266642	8.64894	-3.29306	0.00314812	0.279406	-1.66509
HPRT1	-0.255223	12.4055	-3.28431	0.00321531	0.282491	-1.68341
S100A3	0.45644	11.2822	3.28161	0.00323636	0.282491	-1.68907
RCOR3	0.297008	10.2228	3.2794	0.00325364	0.282491	-1.69369
HIST2H2BE	0.349061	9.34748	3.27716	0.00327127	0.282491	-1.69837
PTGER4	0.265963	9.48723	3.27456	0.00329188	0.282491	-1.70382
EXOSC6	0.260023	11.1495	3.26728	0.00335022	0.283868	-1.71905
ZNF841	0.241853	8.78513	3.26482	0.0033701	0.283868	-1.72418
LGALSL	0.393165	8.43705	3.26194	0.0033936	0.283868	-1.73021
TMC6	0.402268	9.81564	3.2617	0.00339555	0.283868	-1.7307
CYB5R1	0.312727	10.6809	3.25689	0.00343517	0.285339	-1.74076
ESM1	-0.619358	12.1407	-3.2537	0.00346161	0.285704	-1.74741
ZNF114	0.282592	7.93162	3.23242	0.00364354	0.298816	-1.7918
RGL1	0.266887	9.75267	3.22533	0.00370615	0.302039	-1.80656
HIST2H2AC	0.462311	10.6771	3.2216	0.00373953	0.302856	-1.81433
PSME2	0.195341	12.7984	3.21281	0.00381934	0.3056	-1.83262
CDKN2AIP	0.255893	10.2067	3.21267	0.00382059	0.3056	-1.83291
RND3	0.353842	10.7872	3.20838	0.00386013	0.306869	-1.84182
NUP62	-2.09871	12.2505	-3.19973	0.00394112	0.308321	-1.8598
SAA1	0.378698	7.80721	3.19759	0.00396134	0.308321	-1.86424
IFIT3	-0.575553	9.42713	-3.19337	0.00400164	0.308321	-1.873
TATDN3	0.251605	8.91283	3.19235	0.00401145	0.308321	-1.87512
SNHG8	0.322716	11.1754	3.19021	0.00403204	0.308321	-1.87955
CDH11	0.53062	10.6916	3.18715	0.0040617	0.308321	-1.8859
SDC1	-0.276208	11.9056	-3.18693	0.00406392	0.308321	-1.88637
OOSP2	-0.242688	7.64112	-3.18643	0.00406875	0.308321	-1.8874
CASP6	0.645885	9.19581	3.17333	0.00419839	0.313521	-1.91454
NUAK2	0.28174	7.94536	3.17103	0.00422153	0.313521	-1.9193
CRABP2	0.195959	8.12789	3.16559	0.00427689	0.313521	-1.93057
CYP2J2	0.316962	9.21911	3.16355	0.00429781	0.313521	-1.9348
ZNF185	-0.315602	11.8494	-3.16074	0.00432676	0.313521	-1.9406
SPINK1	0.324192	7.7916	3.16018	0.00433259	0.313521	-1.94177
TSPAN8	0.654022	8.30055	3.15954	0.00433924	0.313521	-1.94309
PDGFA	-0.567177	11.0659	-3.15839	0.00435118	0.313521	-1.94547
TMEM164	-0.245715	7.96054	-3.15801	0.00435513	0.313521	-1.94626
AJUBA	0.256261	9.53879	3.15292	0.00440843	0.315016	-1.95678
LTB	0.605799	9.10683	3.15067	0.00443218	0.315016	-1.96143
2008-09-01	-0.211515	7.9428	-3.1491	0.00444883	0.315016	-1.96467
ARHGEF35	0.227529	8.73276	3.14001	0.0045464	0.318985	-1.98343
POLR3GL	0.181896	11.8448	3.1393	0.00455411	0.318985	-1.9849
DLGAP1-AS1	-0.325467	9.19188	-3.13323	0.0046205	0.321388	-1.99741
PABPC3	-0.300306	9.59824	-3.13165	0.00463803	0.321388	-2.00069
AVPI1	0.42317	10.303	3.12881	0.00466953	0.32185	-2.00654
AP1M2	0.308314	8.90753	3.11842	0.00478653	0.323434	-2.02793
EPB41L4A-AS1	0.328292	12.1022	3.1179	0.00479252	0.323434	-2.02901
NFKB2	0.289288	9.0606	3.11672	0.00480601	0.323434	-2.03144
BEX2	0.407296	9.62637	3.11602	0.004814	0.323434	-2.03288
S100P	0.282372	7.42235	3.11573	0.00481731	0.323434	-2.03347
PID1	0.278032	8.94522	3.11218	0.00485815	0.324494	-2.04077
AGPAT9	-0.317392	10.6586	-3.10389	0.00495502	0.328499	-2.05782
SPTLC2	-0.22969	9.08937	-3.10272	0.0049688	0.328499	-2.06022
PPP1R3C	0.381825	9.1364	3.09376	0.00507578	0.331045	-2.07863
EPAS1	0.316969	9.42578	3.09332	0.00508112	0.331045	-2.07953
WNT3	0.224493	8.19866	3.09256	0.00509035	0.331045	-2.0811
PDIA6	-0.247966	11.2761	-3.0891	0.00513233	0.331045	-2.08819
RPAIN	0.151837	12.39	3.0813	0.0052283	0.331045	-2.10419
ASGR1	0.355548	9.10381	3.07981	0.00524682	0.331045	-2.10725
HIST1H2AC	0.386115	10.633	3.07895	0.00525755	0.331045	-2.10901
GPR1	0.245832	7.96	3.07892	0.00525787	0.331045	-2.10906
MAP1LC3A	0.246508	9.7876	3.07772	0.00527291	0.331045	-2.11153
VCX	0.410202	7.97506	3.07689	0.00528335	0.331045	-2.11324
HMOX1	-0.711368	10.8268	-3.07419	0.00531728	0.331045	-2.11876
C6orf1	1.21855	9.36337	3.07343	0.00532685	0.331045	-2.12032
TAF1L	-0.283643	9.33102	-3.07244	0.00533943	0.331045	-2.12235
IWS1	-0.19044	10.3718	-3.0693	0.00537928	0.331553	-2.12877
NKX2-1	0.581332	8.62105	3.06777	0.0053988	0.331553	-2.1319
OPTN	0.235717	11.0033	3.05039	0.00562576	0.343861	-2.16743
PFAS	-0.229457	10.6059	-3.04505	0.00569728	0.344996	-2.17833
PMEL	0.255686	8.1937	3.0429	0.00572634	0.344996	-2.18272
HOXC8	-0.435877	9.13678	-3.04162	0.00574376	0.344996	-2.18534
ZNF165	0.237016	8.197	3.03832	0.00578871	0.344996	-2.19207
LGALS9	0.233558	7.95825	3.03752	0.00579968	0.344996	-2.1937
ENPP2	0.293883	7.61699	3.03627	0.00581691	0.344996	-2.19626
SLC22A5	0.274911	8.45635	3.03527	0.0058307	0.344996	-2.1983
IPO5	-0.266807	10.3967	-3.03166	0.00588063	0.346369	-2.20565
YIPF6	-0.164935	11.5876	-3.02658	0.00595156	0.348961	-2.21599
SOD3	0.33469	8.14974	3.01405	0.00613032	0.357823	-2.2415
PSMB10	0.280503	12.4101	3.01003	0.00618871	0.359579	-2.24967
BCKDHA	0.41077	9.45782	3.00713	0.00623117	0.359579	-2.25556
CCRN4L	0.369048	9.59317	3.00587	0.00624961	0.359579	-2.25811
SOD2	0.318799	8.18538	3.0044	0.00627141	0.359579	-2.26111
RBPMS	-0.266368	8.11971	-3.00029	0.00633236	0.361474	-2.26944
TMTC3	-0.195509	8.79792	-2.98832	0.00651336	0.368782	-2.29372
SH3BGRL3	-0.208917	12.2668	-2.98806	0.0065173	0.368782	-2.29424
SLC37A1	0.199686	8.02142	2.97116	0.0067816	0.374889	-2.32847
SDC4	0.351383	11.5587	2.9709	0.00678573	0.374889	-2.32899
ANP32A	-0.230735	8.46208	-2.97074	0.00678829	0.374889	-2.32932
SDPR	0.594181	10.3248	2.96965	0.00680555	0.374889	-2.3315
UBE4B	-0.218034	9.93208	-2.96929	0.00681134	0.374889	-2.33223
PLEK2	-0.221492	12.1153	-2.96898	0.00681626	0.374889	-2.33286
TAF1	-0.277784	8.69525	-2.96749	0.00684016	0.374889	-2.33587
EEF2K	-0.257138	10.1619	-2.96527	0.00687594	0.374889	-2.34036
PLLP	0.346439	8.48906	2.96467	0.0068856	0.374889	-2.34157
HMGXB4	-0.658411	9.42151	-2.96084	0.00694777	0.375274	-2.3493
FAM103A1	-0.292423	9.68862	-2.95907	0.00697669	0.375274	-2.35288
KHSRP	-0.275251	11.5727	-2.9589	0.00697955	0.375274	-2.35323
ERAP2	0.170174	9.28508	2.95565	0.00703302	0.376271	-2.3598
DUSP18	-0.233699	9.50061	-2.95424	0.00705617	0.376271	-2.36262
PRKCA	-0.344642	11.1531	-2.95036	0.0071207	0.378156	-2.37045
SCG2	0.299211	8.29171	2.94433	0.00722199	0.38197	-2.3826
PPFIBP2	0.255675	7.97823	2.94044	0.00728818	0.383558	-2.39045
SLC20A1	-0.230732	13.7735	-2.93909	0.00731123	0.383558	-2.39317
ANGPTL2	0.292492	10.0028	2.93359	0.00740594	0.386961	-2.40423
RWDD2A	0.200264	9.68659	2.9301	0.00746671	0.387998	-2.41126
PSIP1	-0.264639	9.45372	-2.92901	0.00748568	0.387998	-2.41344
TUBB3	0.266849	11.5793	2.91819	0.00767748	0.395992	-2.43518
DPP7	0.226969	9.78961	2.91555	0.0077249	0.395992	-2.44047
SUN3	0.337596	8.07407	2.91397	0.00775352	0.395992	-2.44365
ABHD17C	0.249092	10.9903	2.91349	0.00776216	0.395992	-2.44461
SNORA11D	-0.215178	10.1633	-2.90954	0.00783401	0.397144	-2.45252
NCBP2	-0.206723	9.80196	-2.90754	0.00787077	0.397144	-2.45655
MTHFD1	-0.241163	9.78593	-2.90721	0.00787667	0.397144	-2.45719
HNRNPA1P33	-0.283293	12.4552	-2.90179	0.007977	0.400643	-2.46806
PARP12	0.204711	10.8661	2.89786	0.00805033	0.401682	-2.47592
GLIPR1	-0.277858	10.4885	-2.89737	0.00805968	0.401682	-2.47692
GSTM3	0.287209	8.95835	2.88742	0.00824865	0.408856	-2.49681
WDR66	0.21591	8.22935	2.88551	0.00828536	0.408856	-2.50063
C4orf19	0.214117	7.59053	2.88484	0.00829827	0.408856	-2.50196
TRIM33	0.212802	9.5264	2.88007	0.00839094	0.410523	-2.51149
PLEKHA4	0.300914	8.52867	2.87983	0.00839548	0.410523	-2.51196
EFNB3	0.264187	8.30969	2.87529	0.00848467	0.413325	-2.52103
MR1	0.266833	8.20554	2.87243	0.00854123	0.414521	-2.52673
DHX15	-0.213472	13.0445	-2.86685	0.00865275	0.418367	-2.53786
SLCO4A1	-0.31666	11.8287	-2.8582	0.00882818	0.423232	-2.55507
HOXB7	0.270913	7.64702	2.85718	0.00884915	0.423232	-2.5571
POLR3C	0.219038	11.0677	2.8555	0.00888367	0.423232	-2.56044
PSAT1	-0.315754	11.4044	-2.85332	0.00892869	0.423232	-2.56478
FKBP1A	-0.253376	13.6977	-2.85253	0.00894516	0.423232	-2.56636
PLCE1	-0.166349	8.21112	-2.85233	0.00894934	0.423232	-2.56676
KRT34	0.24196	8.1267	2.84793	0.00904093	0.426009	-2.57549
ERGIC1	0.442379	9.24485	2.84343	0.00913579	0.428051	-2.58443
MECOM	-0.18912	11.4341	-2.84274	0.00915034	0.428051	-2.5858
SLC16A5	0.288297	9.97239	2.83656	0.00928233	0.431907	-2.59807
ASB16	-0.310839	8.2142	-2.83497	0.00931643	0.431907	-2.60121
ECHDC3	-0.23144	9.15275	-2.83233	0.00937364	0.431907	-2.60646
ATF6B	-0.259792	9.21332	-2.83133	0.00939527	0.431907	-2.60843
HLA-G	0.363069	10.433	2.83114	0.00939943	0.431907	-2.60881
MST1R	0.277175	8.48683	2.82422	0.00955109	0.434881	-2.62252
F13A1	0.270342	7.65302	2.82355	0.00956586	0.434881	-2.62384
RALA	0.180883	12.5331	2.82168	0.00960734	0.434881	-2.62755
SFTA1P	0.33077	11.5354	2.82034	0.00963712	0.434881	-2.6302
DDRGK1	-0.286638	8.70628	-2.8192	0.0096624	0.434881	-2.63244
LIG1	-0.253439	10.6863	-2.81824	0.00968392	0.434881	-2.63435
C1orf106	0.31734	8.91569	2.81725	0.00970622	0.434881	-2.63632
SIPA1L2	0.21317	7.92741	2.812	0.00982445	0.434881	-2.64668
ATP6V1G1	0.182416	12.4188	2.81139	0.00983837	0.434881	-2.6479
MOXD1	0.230367	8.32925	2.81012	0.00986711	0.434881	-2.65039
CHCHD7	0.289948	9.45308	2.80975	0.00987565	0.434881	-2.65113
PKIG	0.24094	8.65941	2.80914	0.00988954	0.434881	-2.65234
TNFAIP3	0.397656	9.1622	2.80663	0.009947	0.434881	-2.65729
MRPL30	-0.620171	9.41109	-2.80545	0.00997398	0.434881	-2.65961
NEU1	0.252986	10.412	2.80485	0.00998793	0.434881	-2.66081
GPNMB	0.217533	7.88311	2.80201	0.0100535	0.434881	-2.66641
HIST2H2AA4	0.389786	11.075	2.80166	0.0100617	0.434881	-2.6671
CTR9	-0.251771	9.3948	-2.80137	0.0100683	0.434881	-2.66766
IL1RL1	0.294804	8.53488	2.79792	0.0101486	0.436361	-2.67446
C5orf15	0.252615	12.8449	2.79602	0.0101932	0.436361	-2.67822
TSC22D3	0.681813	10.7828	2.79558	0.0102035	0.436361	-2.67908
FAM212B	0.212418	7.72914	2.79397	0.0102415	0.436545	-2.68226
PBX3	-0.182545	10.9898	-2.79145	0.0103012	0.437647	-2.68723
TTC14	-0.262524	10.0084	-2.78861	0.0103686	0.438671	-2.69281
AMPH	0.173535	7.86248	2.78759	0.010393	0.438671	-2.69482
KRT86	0.283202	9.04054	2.78493	0.0104567	0.439928	-2.70004
DAB2	0.253376	10.8865	2.78115	0.0105482	0.441041	-2.7075
DNAH2	0.252932	8.20627	2.78074	0.0105582	0.441041	-2.7083
C17orf97	0.290537	9.04708	2.77962	0.0105853	0.441041	-2.71049
ORC2	0.179522	9.68182	2.77292	0.0107495	0.441555	-2.72365
CEMIP	0.249316	7.48541	2.77259	0.0107578	0.441555	-2.72431
ABCA7	0.362227	8.52384	2.77115	0.0107932	0.441555	-2.72712
ATL3	0.223905	11.2465	2.7705	0.0108094	0.441555	-2.72841
NAV3	-0.295626	10.0016	-2.77001	0.0108217	0.441555	-2.72938
CABLES1	0.268993	9.62343	2.76897	0.0108476	0.441555	-2.73142
DHX58	0.302614	8.3291	2.7685	0.0108593	0.441555	-2.73234
KRTAP4-7	-0.22541	7.74613	-2.76784	0.0108757	0.441555	-2.73363
KIAA1211L	0.264927	8.25871	2.76606	0.0109202	0.441555	-2.73711
IL1A	0.321705	8.19351	2.76168	0.0110306	0.441555	-2.74571
MCOLN3	0.217276	8.6027	2.7612	0.0110428	0.441555	-2.74665
LPAR5	0.271728	8.00195	2.76115	0.0110439	0.441555	-2.74674
RAB29	0.187378	9.80873	2.75632	0.0111669	0.441555	-2.7562
2006-09-01	-0.255753	9.37472	-2.75612	0.0111721	0.441555	-2.7566
LGALS9B	-0.323873	8.02403	-2.75592	0.011177	0.441555	-2.75698
TPRN	0.325653	8.8578	2.75069	0.0113118	0.441555	-2.76722
ARHGEF10	-0.173398	10.9099	-2.7504	0.0113195	0.441555	-2.76779
SNORD13	0.710927	12.1509	2.74995	0.0113311	0.441555	-2.76867
MXI1	-0.157322	7.89693	-2.74981	0.0113349	0.441555	-2.76895
RMI2	-0.172013	10.4035	-2.74958	0.0113406	0.441555	-2.76939
SPOPL	-0.211674	8.66708	-2.74855	0.0113674	0.441555	-2.7714
CYP2E1	0.19894	7.67813	2.74799	0.011382	0.441555	-2.7725
STEAP1	-0.352036	10.7052	-2.74701	0.0114076	0.441555	-2.77441
FOXP4	0.287907	8.18112	2.74671	0.0114154	0.441555	-2.775
LOC389705	-0.265464	7.72205	-2.74071	0.0115733	0.44573	-2.78672
ADNP2	0.17251	10.2716	2.74	0.0115921	0.44573	-2.78811
HLA-DMA	0.281295	10.0379	2.73612	0.0116955	0.448375	-2.79569
RHOU	0.213932	8.2659	2.72994	0.0118619	0.453412	-2.80774
MAOA	0.325358	9.24548	2.72378	0.0120299	0.456879	-2.81974
RRAGC	0.192001	10.4283	2.72265	0.0120609	0.456879	-2.82194
AMOT	-0.310263	8.16971	-2.72233	0.0120699	0.456879	-2.82257
LOC644173	0.345174	9.10401	2.72107	0.0121045	0.456879	-2.82501
IFIT1	0.257001	7.93534	2.72019	0.0121289	0.456879	-2.82673
PIK3IP1	0.30244	9.28798	2.71734	0.012208	0.45699	-2.83227
RNF25	0.251036	8.71782	2.71684	0.012222	0.45699	-2.83325
ERC1	-0.194381	9.72191	-2.71628	0.0122376	0.45699	-2.83434
TINAGL1	0.180507	7.84657	2.71483	0.0122783	0.457189	-2.83717
MRPL14	0.23585	12.4149	2.70915	0.0124382	0.461817	-2.8482
SLC7A1	-0.22022	11.5857	-2.70447	0.0125716	0.464276	-2.85729
HLA-F	0.284887	8.72819	2.70431	0.0125761	0.464276	-2.85759
MAMDC2	0.342615	9.89152	2.69933	0.0127194	0.468234	-2.86725
PAX8-AS1	-0.354348	8.88669	-2.69573	0.0128241	0.469441	-2.87423
TXNIP	0.341698	13.331	2.69552	0.0128301	0.469441	-2.87463
AGPAT5	-0.196528	10.0249	-2.69312	0.0129004	0.469441	-2.87929
SULT1B1	-0.356083	8.20919	-2.69091	0.0129654	0.469441	-2.88356
MYL6B	0.238331	11.2858	2.69038	0.012981	0.469441	-2.88459
OXSM	0.215623	9.2132	2.68981	0.0129978	0.469441	-2.8857
B3GNTL1	-0.277154	8.87098	-2.68811	0.0130481	0.469441	-2.88898
SPCS3	-0.609831	10.198	-2.68793	0.0130534	0.469441	-2.88933
VAMP5	0.20286	8.42423	2.68528	0.0131323	0.469441	-2.89446
CAPN5	0.281976	9.12016	2.68483	0.0131458	0.469441	-2.89533
ANP32AP1	-0.271947	9.82872	-2.68466	0.0131507	0.469441	-2.89565
STAT4	0.212132	7.80646	2.68278	0.0132071	0.469708	-2.89929
DDX54	-0.173552	9.37103	-2.68199	0.0132307	0.469708	-2.90082
ACSL4	-0.266111	8.83011	-2.67964	0.0133016	0.470934	-2.90536
AHNAK	0.271566	9.21304	2.67641	0.0133994	0.473104	-2.9116
SAMD9	0.249754	10.218	2.67379	0.0134791	0.473394	-2.91665
TMEM194A	-0.185022	9.79965	-2.67374	0.0134807	0.473394	-2.91674
VCX3A	0.32587	8.30662	2.66648	0.0137045	0.4791	-2.93075
PHLDA3	0.247076	7.84349	2.66487	0.0137546	0.4791	-2.93386
SLC15A3	0.336258	9.05695	2.66418	0.013776	0.4791	-2.93518
B3GNT3	0.209414	7.69634	2.6637	0.013791	0.4791	-2.93611
DDA1	0.180414	12.8217	2.6623	0.0138348	0.479335	-2.93881
RAB3IL1	0.248418	8.41987	2.65668	0.0140119	0.483495	-2.94962
WDFY1	0.202591	10.9486	2.65577	0.0140408	0.483495	-2.95138
SEMA6B	-0.287364	8.78568	-2.65495	0.0140668	0.483495	-2.95295
C9orf152	0.226686	7.67376	2.65151	0.014177	0.48448	-2.95958
CCDC51	0.235011	9.41061	2.65111	0.0141896	0.48448	-2.96034
PARM1	0.223963	7.80743	2.65055	0.0142076	0.48448	-2.96142
PREPL	-0.257013	9.27986	-2.64628	0.0143453	0.484969	-2.96961
HERC2	-0.196019	9.70735	-2.64516	0.0143818	0.484969	-2.97177
TENM4	-0.28659	7.49777	-2.64488	0.0143907	0.484969	-2.9723
ENOSF1	-0.190825	10.4527	-2.64472	0.0143961	0.484969	-2.97262
ITFG2	-0.155883	8.86845	-2.64319	0.0144459	0.484969	-2.97555
COBLL1	0.212289	8.65219	2.64251	0.0144681	0.484969	-2.97686
NSUN7	0.238935	8.32496	2.64181	0.0144911	0.484969	-2.97821
NR2E3	-0.242136	8.05808	-2.64088	0.0145214	0.484969	-2.97998
UBE2NL	-0.178564	8.11222	-2.63862	0.0145957	0.485303	-2.98432
BMP4	0.334604	9.22479	2.6383	0.0146063	0.485303	-2.98493
OACYLP	0.217325	7.62591	2.63633	0.0146712	0.485868	-2.9887
KCNK1	0.217996	9.40969	2.63552	0.0146983	0.485868	-2.99027
ILK	-0.16378	13.7702	-2.63356	0.0147632	0.486772	-2.99401
ARPP19	-0.817496	11.022	-2.63107	0.0148463	0.488271	-2.99878
STMN1	-0.24905	8.77051	-2.62993	0.0148847	0.488293	-3.00097
PARP14	0.322267	9.65593	2.62762	0.0149624	0.489605	-3.00539
GLMP	0.202932	11.4515	2.62489	0.0150545	0.490592	-3.0106
TUBA4A	0.300121	10.558	2.6243	0.0150748	0.490592	-3.01174
CPEB3	0.211713	8.34327	2.62284	0.0151243	0.490592	-3.01453
CUX1	1.07346	9.0655	2.62184	0.0151586	0.490592	-3.01645
ZBTB42	0.31568	8.94954	2.62115	0.0151819	0.490592	-3.01776
CCL5	0.28396	9.00655	2.61937	0.0152431	0.491343	-3.02117
PARL	0.172054	12.4006	2.61803	0.0152891	0.491588	-3.02373
PSMC3IP	-0.201756	9.58091	-2.61605	0.0153574	0.491588	-3.02751
GMFG	0.365695	10.1969	2.61584	0.0153645	0.491588	-3.0279
HNRNPH3	-0.313248	10.7386	-2.61045	0.015552	0.496361	-3.03819
RASSF5	0.232481	9.9644	2.6051	0.01574	0.500087	-3.04838
SYBU	0.192653	9.11427	2.60443	0.0157638	0.500087	-3.04967
NET1	-1.76115	11.1567	-2.60384	0.0157845	0.500087	-3.05078
BTN3A2	0.21931	9.43157	2.59477	0.0161092	0.508053	-3.06804
SPEN	-0.270379	11.0685	-2.5941	0.0161336	0.508053	-3.06933
SRGAP1	-0.25508	10.216	-2.59274	0.0161829	0.508053	-3.07191
FUCA1	0.270076	9.75688	2.59138	0.0162322	0.508053	-3.07449
LMCD1	0.21036	9.9479	2.59038	0.0162687	0.508053	-3.07639
COL5A1	0.372337	11.8985	2.59031	0.0162712	0.508053	-3.07652
DYSF	0.336759	9.9654	2.58853	0.0163362	0.508856	-3.0799
TBX21	0.294774	8.30553	2.58448	0.0164854	0.511034	-3.08761
BCL3	0.261783	9.29387	2.5839	0.0165065	0.511034	-3.08869
TOPBP1	-0.234536	10.4276	-2.58342	0.0165244	0.511034	-3.08961
MARCH4	-0.323246	11.0343	-2.58222	0.0165689	0.51119	-3.09189
PGM3	0.435179	10.3283	2.57999	0.016652	0.512532	-3.09612
SIM2	-0.196551	7.88821	-2.57793	0.0167286	0.513672	-3.10001
MASTL	-0.510562	9.67821	-2.57645	0.0167843	0.514162	-3.10282
RNASEH2C	-0.230049	9.57815	-2.57347	0.0168964	0.516376	-3.10846
SPATS2	-0.277169	10.0538	-2.56885	0.017072	0.520516	-3.11722
CXCL10	0.171025	7.86647	2.56747	0.0171248	0.520899	-3.11983
ADSSL1	-0.173645	8.03133	-2.56474	0.0172295	0.522857	-3.12499
CD3EAP	-0.210963	8.40196	-2.5627	0.0173079	0.524009	-3.12883
SLC14A1	-0.332418	8.33843	-2.56092	0.0173771	0.524877	-3.13221
STX3	0.179998	10.2891	2.55727	0.0175192	0.525568	-3.1391
ETV6	0.273837	10.4952	2.5572	0.0175219	0.525568	-3.13923
ZCWPW1	0.238442	9.63432	2.55648	0.0175501	0.525568	-3.14059
TBCK	-0.221927	9.11987	-2.55617	0.0175622	0.525568	-3.14117
RCBTB2	-0.249927	8.44531	-2.55437	0.0176328	0.525843	-3.14457
DROSHA	0.183628	7.7444	2.55387	0.0176526	0.525843	-3.14551
ZNF581	0.221691	10.7029	2.55218	0.0177192	0.526597	-3.1487
NT5C2	0.156193	11.0153	2.54972	0.0178165	0.526597	-3.15333
KCNK6	0.213096	9.13504	2.54942	0.0178285	0.526597	-3.1539
SNORA7A	0.227782	7.78368	2.54883	0.0178518	0.526597	-3.155
STX4	0.20869	10.2292	2.5481	0.0178811	0.526597	-3.15639
IFI44	0.253198	11.4936	2.54658	0.0179417	0.527184	-3.15925
NUDT5	-0.242417	12.0459	-2.54465	0.018019	0.528258	-3.16288
SMARCC2	0.445742	8.84509	2.5411	0.0181618	0.531072	-3.16956
TRIM5	0.353598	9.56787	2.54023	0.0181969	0.531072	-3.17119
DNAJC22	0.178699	8.08669	2.539	0.0182469	0.531332	-3.17351
SNX29	-0.220606	8.76589	-2.53703	0.0183272	0.53135	-3.17722
TNFRSF11B	0.277174	9.19025	2.53697	0.0183295	0.53135	-3.17732
STT3A	-0.219239	12.5336	-2.53439	0.018435	0.53251	-3.18218
ARMC4	-0.184505	8.13272	-2.53361	0.0184669	0.53251	-3.18364
PTPN22	-0.348264	9.32345	-2.53298	0.0184928	0.53251	-3.18482
AUH	-0.234274	9.22202	-2.52883	0.0186641	0.535634	-3.19261
DAP3	0.145177	11.9719	2.52835	0.0186839	0.535634	-3.19351
MAFB	-0.164743	7.77141	-2.52649	0.0187612	0.535985	-3.19699
ICMT	-0.216799	10.6964	-2.52586	0.0187876	0.535985	-3.19818
C1orf115	0.240796	7.94805	2.52508	0.0188203	0.535985	-3.19965
GALNT5	0.226027	8.98149	2.52328	0.0188956	0.536949	-3.20302
NSFL1C	0.28328	9.93971	2.51615	0.0191969	0.542928	-3.21637
GUCA1B	0.250866	9.06567	2.51475	0.0192564	0.542928	-3.21899
SCNM1	0.165404	9.75156	2.51087	0.0194228	0.542928	-3.22624
RUFY1	-0.159116	9.9744	-2.51059	0.0194346	0.542928	-3.22676
CD55	0.452435	9.86034	2.50984	0.0194669	0.542928	-3.22816
TMEM217	0.263957	9.03391	2.50958	0.0194785	0.542928	-3.22866
PLAUR	-0.267944	12.02	-2.50855	0.019523	0.542928	-3.23059
INPP4B	0.21766	10.0955	2.50734	0.019575	0.542928	-3.23283
PRDM8	-0.26047	12.1141	-2.50691	0.0195939	0.542928	-3.23365
IL23A	0.177435	7.8977	2.50637	0.0196171	0.542928	-3.23464
DONSON	0.534238	8.53646	2.50573	0.0196451	0.542928	-3.23585
FBXW9	0.318328	9.98334	2.5056	0.0196506	0.542928	-3.23608
PSMB4	0.161886	12.4123	2.5045	0.0196988	0.542928	-3.23815
YPEL2	0.283737	9.07893	2.50439	0.0197036	0.542928	-3.23835
SLC23A3	-0.252164	7.92242	-2.50366	0.0197354	0.542928	-3.23971
FAM46C	0.248868	9.07309	2.50272	0.0197764	0.542928	-3.24146
TMSB15B	-0.704188	9.56064	-2.49952	0.0199169	0.54563	-3.24743
SNX14	0.148657	7.76654	2.49749	0.0200063	0.546923	-3.25121
LOC338620	-0.153756	7.93841	-2.49174	0.0202624	0.552054	-3.26193
TMEM131	-0.246115	12.2871	-2.49136	0.0202792	0.552054	-3.26263
IGFBP7	0.264083	12.8896	2.48892	0.0203889	0.552359	-3.26718
ROR1	0.28626	8.88979	2.48591	0.0205247	0.552359	-3.27277
SNORD68	0.264268	9.01966	2.48546	0.0205449	0.552359	-3.2736
PAQR4	-0.169493	10.8457	-2.48313	0.0206509	0.552359	-3.27793
DENND2A	0.285989	8.63884	2.48223	0.0206922	0.552359	-3.27962
HOXB8	-0.303439	9.04739	-2.48172	0.0207151	0.552359	-3.28055
FBLN1	-0.555421	8.80999	-2.48032	0.0207792	0.552359	-3.28315
PLAC8	0.355474	10.7382	2.47921	0.0208301	0.552359	-3.28521
CFB	0.32259	10.3857	2.47883	0.0208479	0.552359	-3.28593
DUSP12	0.176255	12.0689	2.47882	0.0208483	0.552359	-3.28595
DBNDD1	-1.00097	8.75307	-2.47858	0.0208593	0.552359	-3.28639
AMMECR1	-0.187625	9.54243	-2.47786	0.0208922	0.552359	-3.28772
COL6A3	-0.242431	11.8318	-2.47786	0.0208923	0.552359	-3.28772
ACSL3	-0.226898	9.19031	-2.47782	0.0208943	0.552359	-3.2878
RUFY3	0.194639	8.64054	2.47705	0.0209298	0.552359	-3.28923
H3F3B	0.225363	11.4877	2.47591	0.0209823	0.552619	-3.29134
NRF1	0.236939	7.90383	2.47267	0.0211323	0.554299	-3.29734
BMP1	-0.80551	8.74919	-2.47175	0.0211754	0.554299	-3.29905
RASSF7	0.258946	11.5275	2.47002	0.021256	0.554299	-3.30225
RBM4B	-0.190272	10.7574	-2.46924	0.0212927	0.554299	-3.30371
SNORD33	0.380511	9.12962	2.46904	0.0213021	0.554299	-3.30408
PLEKHO1	0.262727	9.42243	2.46855	0.0213248	0.554299	-3.30497
RWDD1	0.23041	7.93515	2.46811	0.0213455	0.554299	-3.30579
VPS18	0.264053	9.24652	2.46649	0.0214218	0.554549	-3.30879
NDUFV2	0.175337	12.8463	2.46609	0.0214407	0.554549	-3.30954
RAB15	0.252156	8.31795	2.46176	0.0216458	0.558739	-3.31755
SEPHS2	0.187499	10.0116	2.4585	0.0218013	0.559497	-3.32357
SMG6	-0.242521	8.82803	-2.45741	0.021854	0.559497	-3.32559
NUDT14	0.24249	10.1917	2.454	0.0220179	0.559497	-3.33188
C8orf4	0.204096	7.67761	2.45326	0.022054	0.559497	-3.33326
IGSF3	0.232919	7.96742	2.45206	0.0221121	0.559497	-3.33547
AHCY	-0.185348	12.8292	-2.45182	0.0221239	0.559497	-3.33592
RIN2	-0.153049	11.0216	-2.45169	0.0221301	0.559497	-3.33615
KLHL42	-0.167205	11.2515	-2.45088	0.0221696	0.559497	-3.33765
ATXN7L3B	-0.178471	11.1089	-2.45059	0.0221836	0.559497	-3.33818
SMIM11	0.147435	8.62433	2.44988	0.0222179	0.559497	-3.33948
APRT	-0.529553	10.7069	-2.44965	0.0222291	0.559497	-3.33991
CRADD	0.208826	12.2869	2.44898	0.0222618	0.559497	-3.34114
MAP3K8	0.185755	7.577	2.44696	0.022361	0.559497	-3.34488
TBRG1	-0.173777	8.48369	-2.44609	0.0224036	0.559497	-3.34648
PURB	-0.151686	12.2365	-2.4458	0.0224179	0.559497	-3.34702
CTDSPL	0.187898	10.9523	2.44475	0.0224695	0.559497	-3.34895
SNHG15	0.169755	11.6942	2.44411	0.0225009	0.559497	-3.35012
TEX11	-0.21584	7.98679	-2.4431	0.0225507	0.559497	-3.35198
FAM171A1	-0.224764	11.8286	-2.44307	0.0225521	0.559497	-3.35203
NONO	-0.187189	9.25416	-2.44293	0.0225594	0.559497	-3.3523
CLIP3	-0.366443	9.20306	-2.44059	0.0226754	0.559497	-3.35661
MANSC1	-0.20094	8.26888	-2.43833	0.0227876	0.559497	-3.36076
CNPY3	-0.218904	9.57464	-2.43825	0.0227916	0.559497	-3.3609
PROCR	0.186588	10.2403	2.43778	0.0228151	0.559497	-3.36177
B4GALT4	0.151002	9.34479	2.43723	0.0228428	0.559497	-3.36279
CBR1	0.278091	9.13916	2.43671	0.0228686	0.559497	-3.36374
CITED2	0.288526	11.2233	2.43667	0.0228705	0.559497	-3.36381
ABCA1	0.358222	9.94564	2.43608	0.0229002	0.559497	-3.3649
CABYR	0.2109	7.88033	2.43554	0.0229274	0.559497	-3.36589
MATK	-0.215558	7.81944	-2.43363	0.0230233	0.559818	-3.3694
RNU105C	-0.336042	7.8969	-2.43356	0.0230269	0.559818	-3.36953
HADH	-0.199849	11.7843	-2.42484	0.02347	0.565372	-3.38553
SNORD46	0.268865	8.4081	2.42472	0.0234765	0.565372	-3.38577
PAPL	-0.179747	7.70953	-2.41663	0.0238949	0.565372	-3.40059
WWC1	0.248182	9.77983	2.41557	0.0239501	0.565372	-3.40252
LIN9	0.290543	9.0128	2.41536	0.0239611	0.565372	-3.40291
MFGE8	0.250208	11.949	2.41534	0.023962	0.565372	-3.40294
NRGN	-0.202259	10.5712	-2.41524	0.0239671	0.565372	-3.40312
PNMA2	0.263121	10.3221	2.41346	0.0240605	0.565372	-3.40638
NMRAL1	0.23404	10.7329	2.41301	0.0240839	0.565372	-3.4072
FBRS	0.598706	8.3712	2.4126	0.0241054	0.565372	-3.40795
MST1	0.314956	8.21275	2.41235	0.0241189	0.565372	-3.40841
LRRN4	0.283567	8.30214	2.41113	0.0241831	0.565372	-3.41064
RNFT2	-0.16703	9.80721	-2.40984	0.0242512	0.565372	-3.413
NCOR2	-0.210465	7.88099	-2.4089	0.0243011	0.565372	-3.41472
SLC38A5	-0.181443	7.83538	-2.40837	0.0243291	0.565372	-3.41569
C14orf37	0.256466	8.64093	2.4083	0.0243327	0.565372	-3.41582
RBPMS2	0.232724	8.64806	2.40773	0.0243629	0.565372	-3.41686
TMC7	-0.186819	8.76953	-2.40714	0.0243942	0.565372	-3.41793
SPTLC3	-0.218991	8.56662	-2.40607	0.0244514	0.565372	-3.41989
KDM4D	0.255088	7.96937	2.40601	0.0244544	0.565372	-3.41999
SCFD2	-0.196733	8.16245	-2.40595	0.0244575	0.565372	-3.4201
RELB	0.294296	8.91865	2.40579	0.0244662	0.565372	-3.4204
BAIAP2L2	0.185819	7.64974	2.40527	0.0244936	0.565372	-3.42134
MTFR2	-0.206464	8.9618	-2.40456	0.0245319	0.565372	-3.42265
SNORA71A	0.233983	8.05121	2.40401	0.024561	0.565372	-3.42364
ADGRG1	-0.258009	11.2327	-2.40349	0.0245891	0.565372	-3.4246
GPX4	0.143374	13.7841	2.40291	0.0246198	0.565372	-3.42565
THAP3	0.192424	7.63295	2.4023	0.0246528	0.565372	-3.42677
ARL1	0.166858	11.3753	2.40129	0.0247072	0.565372	-3.42862
IFITM3	0.208621	13.736	2.40092	0.024727	0.565372	-3.42929
TMPRSS7	0.18113	7.95273	2.40024	0.0247637	0.565372	-3.43053
NR4A2	0.332249	9.43819	2.39895	0.0248328	0.565372	-3.43287
DDX17	-0.605056	9.57738	-2.39785	0.0248927	0.565372	-3.43488
ISOC2	0.205039	10.3658	2.39698	0.0249399	0.565372	-3.43647
EXT2	-0.181914	10.7462	-2.39691	0.0249436	0.565372	-3.43659
GNG7	-0.174373	8.31469	-2.39682	0.0249484	0.565372	-3.43676
C1GALT1C1	-0.220455	9.30462	-2.39666	0.0249572	0.565372	-3.43705
ACOX1	-0.196625	9.08568	-2.39572	0.0250079	0.565372	-3.43875
ACVRL1	0.206985	8.01032	2.39511	0.0250411	0.565372	-3.43986
PLSCR4	0.263823	9.20781	2.39246	0.0251861	0.565372	-3.4447
PHF1	0.394803	9.55286	2.39233	0.0251928	0.565372	-3.44492
KRT81	0.497358	10.6374	2.39204	0.0252089	0.565372	-3.44546
PFKM	-0.155886	10.4214	-2.39195	0.0252138	0.565372	-3.44562
EHD1	0.22697	12.6603	2.39163	0.0252316	0.565372	-3.44621
GABPB1	-0.21548	9.32335	-2.39099	0.0252663	0.565372	-3.44736
EVA1A	0.934713	10.9016	2.39073	0.0252806	0.565372	-3.44783
SLC35A4	-0.23864	10.6065	-2.39027	0.025306	0.565372	-3.44868
EAF2	0.158629	7.55275	2.38761	0.025453	0.565781	-3.45352
FAM168A	-0.190099	10.8419	-2.38704	0.0254842	0.565781	-3.45455
RELL2	0.20205	8.10197	2.38691	0.0254912	0.565781	-3.45478
INTS12	0.153245	10.3462	2.38677	0.025499	0.565781	-3.45504
ILF3-AS1	0.174788	10.367	2.38594	0.025545	0.565832	-3.45655
VIM	-0.162093	15.4717	-2.38396	0.0256553	0.566033	-3.46015
RASL11B	-0.270124	8.34025	-2.38387	0.0256599	0.566033	-3.4603
SSBP3	-0.291359	9.27902	-2.38342	0.0256851	0.566033	-3.46112
OSTF1	-0.159056	11.151	-2.38118	0.0258104	0.567018	-3.4652
PCDH1	-0.197465	7.57115	-2.38106	0.0258173	0.567018	-3.46542
PI4KAP1	-0.220225	9.42359	-2.37993	0.0258806	0.567446	-3.46747
TSPAN13	0.25786	9.41105	2.37848	0.0259621	0.567701	-3.4701
SLC22A18	0.277678	8.74079	2.37816	0.0259798	0.567701	-3.47067
SNAP91	0.208968	8.0891	2.37707	0.0260414	0.568089	-3.47265
TSEN2	-0.145666	10.6595	-2.37546	0.0261323	0.568585	-3.47557
STK39	-0.169496	10.9927	-2.37512	0.0261519	0.568585	-3.4762
CHD6	-0.202234	9.28687	-2.37413	0.0262078	0.568845	-3.47798
MYL5	0.266372	9.01159	2.37141	0.0263625	0.571128	-3.4829
MX1	0.626998	10.9905	2.36818	0.0265476	0.571128	-3.48876
MCTP2	0.184338	7.65373	2.36759	0.0265816	0.571128	-3.48982
BBS12	0.211068	8.42321	2.36371	0.0268055	0.571128	-3.49683
CARS	-0.216657	9.25078	-2.36336	0.0268259	0.571128	-3.49747
AHI1	0.273991	9.38107	2.36271	0.0268638	0.571128	-3.49865
HDAC8	-0.234328	8.86538	-2.36226	0.0268895	0.571128	-3.49945
URB1-AS1	0.199705	8.21734	2.3617	0.026922	0.571128	-3.50046
KRT80	0.283691	9.12782	2.3616	0.0269281	0.571128	-3.50065
FER1L4	0.276316	7.80687	2.36018	0.027011	0.571128	-3.50322
NCOR1	-0.218809	9.20665	-2.3595	0.0270506	0.571128	-3.50444
TRNP1	0.229162	8.78965	2.35785	0.0271472	0.571128	-3.50742
STK32C	0.180786	7.78831	2.3573	0.0271796	0.571128	-3.50842
LAMA3	-0.272363	8.73438	-2.35561	0.0272791	0.571128	-3.51147
TMEM55B	0.172495	10.5359	2.3552	0.027303	0.571128	-3.5122
BTN3A3	0.210683	8.86678	2.35516	0.0273055	0.571128	-3.51228
CMTM8	0.256254	9.78268	2.35461	0.0273381	0.571128	-3.51327
GHRHR	-0.152037	7.8147	-2.35443	0.0273482	0.571128	-3.51358
NFKBIA	0.234031	13.2084	2.35439	0.0273509	0.571128	-3.51367
MLEC	-0.173555	12.7654	-2.35405	0.0273707	0.571128	-3.51427
HIST2H4B	0.248368	8.48903	2.35402	0.0273729	0.571128	-3.51434
PLGLA	-0.180629	7.81945	-2.35365	0.0273943	0.571128	-3.51499
PCDH7	-0.359859	8.81356	-2.35309	0.0274278	0.571128	-3.51601
NMD3	-0.487068	10.3227	-2.35266	0.027453	0.571128	-3.51678
LRRC42	0.143941	10.9654	2.35258	0.0274578	0.571128	-3.51692
ZC3H12C	0.189753	10.3609	2.35256	0.0274589	0.571128	-3.51696
ZNF789	0.182886	9.54126	2.35116	0.0275424	0.571947	-3.51949
TBC1D19	-0.220959	8.98447	-2.34824	0.0277163	0.574563	-3.52475
HLA-A	0.186254	15.0139	2.34756	0.0277571	0.574563	-3.52598
ZBED9	0.177312	7.6047	2.34543	0.0278845	0.575818	-3.5298
ASCC3	-0.589208	9.58428	-2.34506	0.0279066	0.575818	-3.53046
NUP107	-0.153324	11.4262	-2.34233	0.0280713	0.577752	-3.53537
UPF2	-1.059	10.3822	-2.34108	0.0281469	0.577752	-3.53762
C9orf3	0.202794	8.66737	2.34081	0.0281633	0.577752	-3.5381
PNMAL1	0.20531	9.66707	2.34036	0.0281909	0.577752	-3.53892
HARS2	0.154142	11.3742	2.33983	0.0282232	0.577752	-3.53988
NMNAT2	0.270047	9.51382	2.33905	0.0282707	0.57781	-3.54128
PROS1	0.258049	10.9902	2.33757	0.0283604	0.577885	-3.54392
CCT6B	0.340968	8.42486	2.33752	0.0283636	0.577885	-3.54402
BLZF1	-0.18184	13.4605	-2.33455	0.0285454	0.579862	-3.54935
CEP85L	-0.195165	8.71772	-2.33416	0.0285698	0.579862	-3.55006
FAXDC2	0.336982	8.83	2.33375	0.0285948	0.579862	-3.55079
ZNF502	0.174433	8.63604	2.33148	0.0287348	0.58179	-3.55486
NPAS1	0.164737	7.87689	2.32872	0.0289058	0.584339	-3.55981
ANKRD22	-0.195514	8.14652	-2.32741	0.0289874	0.585076	-3.56216
GALNT13	-0.173639	7.78908	-2.32506	0.0291337	0.586375	-3.56636
C16orf13	0.610056	9.00683	2.32493	0.0291423	0.586375	-3.5666
PRRC2A	-0.469945	10.9531	-2.32233	0.0293053	0.58874	-3.57125
ZEB1	-0.289979	8.19826	-2.32071	0.0294069	0.589868	-3.57413
ARRDC4	0.154052	7.87298	2.31998	0.0294536	0.589891	-3.57546
SH2D3A	0.224212	7.83209	2.31745	0.0296137	0.590044	-3.57997
CKB	0.248504	10.3136	2.31736	0.0296195	0.590044	-3.58014
CAPN12	-0.159708	7.71504	-2.3162	0.0296932	0.590044	-3.58221
XCR1	0.37185	8.22008	2.31583	0.0297168	0.590044	-3.58287
MED20	-0.128643	12.3339	-2.31576	0.0297212	0.590044	-3.58299
CD79B	0.24132	8.9571	2.31537	0.0297462	0.590044	-3.58369
TMEM201	-0.172328	7.73404	-2.31429	0.0298151	0.590044	-3.58562
SCHIP1	-0.192348	9.63295	-2.31377	0.0298481	0.590044	-3.58654
NUDT8	-0.198453	7.78301	-2.31325	0.0298814	0.590044	-3.58747
KNTC1	-0.206867	11.4504	-2.3127	0.0299166	0.590044	-3.58845
TUFT1	0.161114	11.6773	2.31123	0.0300108	0.590115	-3.59107
MAN2B2	0.166319	11.4962	2.31123	0.0300113	0.590115	-3.59108
SKI	-0.223028	9.36748	-2.30928	0.0301368	0.591143	-3.59456
LRRC8B	0.179392	8.81984	2.309	0.0301548	0.591143	-3.59505
MIR635	0.179472	7.61507	2.30525	0.030398	0.594819	-3.60174
MYLIP	0.221811	10.268	2.30392	0.0304844	0.594819	-3.6041
RRAGD	0.211118	10.5485	2.30383	0.0304901	0.594819	-3.60426
DDX60	0.393137	9.21605	2.30328	0.0305259	0.594819	-3.60523
HIP1	-0.15915	7.87244	-2.30042	0.0307137	0.59758	-3.61034
PITPNM1	-0.193188	10.8029	-2.29892	0.0308123	0.597948	-3.613
FAM131B	-0.176113	7.80281	-2.29873	0.0308249	0.597948	-3.61334
TCHP	-0.187167	9.74173	-2.29802	0.0308712	0.59795	-3.61459
HAS2	-0.192282	9.56812	-2.29657	0.0309673	0.598432	-3.61718
SP140	0.211302	8.26536	2.29615	0.030995	0.598432	-3.61792
TP53BP1	-0.173793	10.6295	-2.29549	0.0310387	0.598432	-3.61909
ATP6V0A4	0.205515	7.865	2.29326	0.0311868	0.598432	-3.62305
NEK8	0.258232	8.30114	2.29226	0.0312534	0.598432	-3.62482
UHRF1	-0.207091	8.28668	-2.29105	0.0313346	0.598432	-3.62698
SAYSD1	0.202012	9.51861	2.2909	0.0313445	0.598432	-3.62724
TGFBR3	0.237288	8.90396	2.29043	0.0313759	0.598432	-3.62808
CPS1	-0.198652	8.96323	-2.28937	0.0314469	0.598432	-3.62996
PCDH19	-0.328916	8.31482	-2.28915	0.0314615	0.598432	-3.63034
HIBCH	-0.209138	10.2221	-2.28823	0.0315236	0.598432	-3.63198
BABAM1	0.170859	12.6266	2.28811	0.0315313	0.598432	-3.63218
SMS	-0.196245	12.9679	-2.28798	0.0315405	0.598432	-3.63243
CREBL2	-0.218025	8.2213	-2.28795	0.0315426	0.598432	-3.63248
SGK3	0.232822	8.73504	2.28693	0.0316111	0.598855	-3.63429
PEX19	0.193986	10.4475	2.28499	0.031742	0.600457	-3.63772
GIT1	-0.164817	9.69639	-2.28178	0.03196	0.603079	-3.64341
ACACA	-0.21035	10.6357	-2.28158	0.0319737	0.603079	-3.64376
RPUSD1	0.208785	9.46171	2.27998	0.0320825	0.603687	-3.64658
IDH3B	0.147299	12.3161	2.27974	0.0320991	0.603687	-3.64701
RAB7A	-0.163647	12.5571	-2.27844	0.0321879	0.603817	-3.64931
RHOD	0.287294	8.93744	2.27756	0.0322487	0.603817	-3.65087
FOXK2	-0.187876	8.20942	-2.27674	0.0323046	0.603817	-3.65231
CCP110	-0.194253	10.3612	-2.2767	0.0323074	0.603817	-3.65239
TCFL5	-0.233586	11.569	-2.27355	0.0325252	0.603817	-3.65796
LHX6	0.18991	7.90493	2.27302	0.032562	0.603817	-3.6589
RPGR	-0.224907	8.9654	-2.27287	0.0325718	0.603817	-3.65916
LRRC16B	0.189686	7.7153	2.27278	0.0325784	0.603817	-3.65932
PDZD8	-0.193103	9.19835	-2.27261	0.0325901	0.603817	-3.65962
ADAMTS1	0.327199	9.87204	2.27115	0.0326915	0.603817	-3.6622
DNAJC18	-0.146076	9.00362	-2.27113	0.0326931	0.603817	-3.66224
CALM3	-0.171975	13.7608	-2.27072	0.0327212	0.603817	-3.66295
NOL3	0.176754	9.49147	2.27062	0.0327281	0.603817	-3.66313
TCEA3	0.322486	10.0156	2.27019	0.0327584	0.603817	-3.6639
SLC22A3	-0.194955	8.31417	-2.26819	0.0328979	0.605528	-3.66742
KLHDC9	0.194436	8.25151	2.26673	0.0329998	0.60593	-3.66999
SNORA12	0.316771	8.31553	2.26654	0.0330133	0.60593	-3.67033
NFE2L3	0.21367	11.6113	2.26354	0.033224	0.608934	-3.67561
RNMTL1	0.177832	11.1377	2.26163	0.0333594	0.610552	-3.67898
CTSF	0.249892	9.98052	2.25695	0.0336923	0.615477	-3.68722
EID2	-0.158976	10.3885	-2.25651	0.0337235	0.615477	-3.68798
NDUFA7	0.213823	10.2743	2.25476	0.0338494	0.615949	-3.69107
GATA3	0.143377	7.7812	2.25402	0.0339022	0.615949	-3.69237
MX2	0.428892	8.54367	2.25366	0.033928	0.615949	-3.693
KAT6B	-0.154292	7.88812	-2.2535	0.0339395	0.615949	-3.69328
ZC3H12A	0.281718	8.63389	2.25104	0.034117	0.617503	-3.6976
ZNF439	0.172159	9.71637	2.25099	0.0341204	0.617503	-3.69768
SDR16C5	0.20879	7.85731	2.24908	0.034259	0.617622	-3.70104
ALOX5AP	0.240627	8.20969	2.24904	0.0342619	0.617622	-3.70111
SNAPC2	-0.204996	10.9671	-2.24735	0.0343844	0.617622	-3.70407
CADPS	0.159653	7.91185	2.24554	0.0345164	0.617622	-3.70724
LAMB1	-0.220209	9.36904	-2.24543	0.0345248	0.617622	-3.70745
RPS15	1.68546	10.1024	2.24537	0.0345287	0.617622	-3.70754
PCDHGB1	-0.132462	8.10108	-2.24484	0.034568	0.617622	-3.70848
RAET1G	0.202619	8.28479	2.24482	0.0345692	0.617622	-3.70851
RAD23B	0.308143	10.1212	2.24478	0.0345721	0.617622	-3.70858
RAB22A	-0.215208	11.1349	-2.24435	0.0346036	0.617622	-3.70933
SOCS1	-0.175291	8.14228	-2.24308	0.034697	0.617979	-3.71157
SNTB2	-0.233298	9.5449	-2.24278	0.034719	0.617979	-3.71209
CXADR	0.233643	9.58039	2.24171	0.0347977	0.618482	-3.71397
WWC2-AS2	0.155275	7.88894	2.24097	0.0348522	0.618482	-3.71526
MAP7	0.152455	7.68813	2.24045	0.0348904	0.618482	-3.71617
ZBTB8A	0.175202	8.72246	2.23894	0.0350019	0.619014	-3.71881
RENBP	-0.358796	8.21949	-2.23666	0.0351711	0.619014	-3.7228
FBXW8	-0.127817	8.79907	-2.2366	0.0351752	0.619014	-3.7229
WFDC3	0.40706	9.42056	2.23626	0.0352008	0.619014	-3.7235
MOB3C	0.233928	10.2171	2.23462	0.0353228	0.619014	-3.72637
CDC14B	-0.222351	9.75811	-2.23445	0.0353352	0.619014	-3.72666
SLC9A1	-0.182317	10.8076	-2.23379	0.0353844	0.619014	-3.72781
AASDHPPT	-0.798011	11.0849	-2.23364	0.0353955	0.619014	-3.72807
RBBP5	-0.145673	9.26563	-2.23282	0.0354574	0.619014	-3.72951
MSRB3	0.196181	9.53733	2.23254	0.0354784	0.619014	-3.73
C18orf54	-0.160098	9.54183	-2.23249	0.0354821	0.619014	-3.73009
BTN3A1	0.206544	9.07481	2.23233	0.0354937	0.619014	-3.73036
SNORD32B	0.211966	7.54146	2.23095	0.0355973	0.619326	-3.73277
ADCY3	-0.18356	11.645	-2.23074	0.0356133	0.619326	-3.73315
RFFL	-0.192481	9.90103	-2.23018	0.035655	0.619326	-3.73411
IMPA2	-0.18637	10.6324	-2.22879	0.03576	0.620319	-3.73655
NIPAL2	-0.164373	7.8073	-2.22712	0.0358858	0.620998	-3.73945
PORCN	0.24872	8.65395	2.22652	0.0359314	0.620998	-3.7405
GSTZ1	0.326908	8.5964	2.22633	0.0359461	0.620998	-3.74084
RIBC1	0.163466	7.67986	2.22574	0.0359909	0.620998	-3.74187
MDK	-0.784425	7.6992	-2.22403	0.0361208	0.621146	-3.74485
SLC25A25	-0.974836	9.03791	-2.22353	0.0361584	0.621146	-3.74571
HIC1	-0.133711	8.14005	-2.22346	0.0361642	0.621146	-3.74584
PRKCH	0.195406	8.88526	2.22282	0.036213	0.621146	-3.74696
LSR	0.238385	8.22131	2.22221	0.0362595	0.621146	-3.74802
KHDRBS3	-0.145181	12.3214	-2.22185	0.0362871	0.621146	-3.74865
ATL2	-0.18753	9.61457	-2.22013	0.0364187	0.622578	-3.75164
TCEB3	0.274322	10.0659	2.21875	0.0365249	0.62357	-3.75405
PITPNC1	-0.224981	9.53208	-2.21526	0.0367941	0.625713	-3.76012
JAG1	-0.161317	11.734	-2.21504	0.0368107	0.625713	-3.76049
HLA-DRA	0.2965	9.64208	2.21462	0.0368433	0.625713	-3.76122
FBXO32	0.566064	9.80716	2.21462	0.0368436	0.625713	-3.76123
PROK1	0.193125	8.12807	2.21174	0.0370671	0.628635	-3.76622
DYNLL2	0.198526	10.2389	2.21	0.0372034	0.628635	-3.76925
TM6SF1	-0.414891	8.26946	-2.20989	0.0372116	0.628635	-3.76944
PABPC4L	0.181197	9.1211	2.20918	0.0372673	0.628635	-3.77067
ZSCAN29	0.197188	8.15278	2.2088	0.0372967	0.628635	-3.77132
CYSTM1	0.229583	10.0154	2.20772	0.0373815	0.628635	-3.7732
APBB3	-0.602243	11.2105	-2.20697	0.0374406	0.628635	-3.7745
GUK1	0.1895	12.2037	2.20659	0.0374708	0.628635	-3.77517
ADAT2	-0.154747	7.85874	-2.205	0.0375961	0.628635	-3.77793
PEAR1	-0.170801	8.86903	-2.20466	0.0376231	0.628635	-3.77852
ATP2A2	-0.248099	12.0476	-2.20422	0.0376573	0.628635	-3.77927
MEAF6	-0.138449	8.31587	-2.20404	0.0376721	0.628635	-3.77959
RUVBL1	-0.376562	10.4298	-2.20387	0.0376854	0.628635	-3.77988
CEP152	-0.175908	9.34612	-2.20352	0.0377132	0.628635	-3.78049
SNORD15B	0.340481	8.30687	2.20305	0.0377499	0.628635	-3.7813
COLQ	0.2377	8.20096	2.20252	0.0377918	0.628635	-3.78221
ALG10	-0.164088	7.95286	-2.19899	0.038073	0.632474	-3.78833
TMEM205	0.232818	12.5593	2.19786	0.0381637	0.632474	-3.79029
SURF1	0.196453	10.3286	2.19746	0.0381951	0.632474	-3.79097
ERRFI1	-0.192266	14.0767	-2.19633	0.0382863	0.632474	-3.79294
ZNF473	-0.530032	9.59185	-2.19482	0.0384076	0.632474	-3.79555
CDH2	0.168609	7.83343	2.1945	0.0384334	0.632474	-3.7961
IFIH1	0.276867	9.78335	2.19443	0.0384388	0.632474	-3.79622
EVI5L	-0.152393	11.542	-2.19395	0.0384777	0.632474	-3.79705
CDA	0.29469	8.62002	2.1938	0.0384893	0.632474	-3.7973
SCAF1	-0.219743	8.64012	-2.19354	0.0385107	0.632474	-3.79776
SLFN5	0.225431	8.5593	2.19276	0.0385735	0.632684	-3.7991
ZNF583	0.188394	8.60034	2.19217	0.0386212	0.632684	-3.80012
CARD9	0.187683	7.85824	2.19026	0.0387756	0.634191	-3.80341
KCNMB4	0.163443	8.08105	2.18979	0.0388141	0.634191	-3.80423
CEP104	-0.154323	8.45434	-2.18922	0.03886	0.634191	-3.8052
DSCAM	-0.153893	8.17281	-2.18775	0.0389797	0.634705	-3.80774
TRO	-0.210781	8.21708	-2.18764	0.0389894	0.634705	-3.80795
PGBD2	-0.174568	8.82968	-2.18574	0.0391441	0.634756	-3.81121
PPP1R13B	0.216546	8.98667	2.18553	0.0391612	0.634756	-3.81157
ETF1	-1.3287	10.6886	-2.18499	0.039206	0.634756	-3.81251
HECTD4	-0.208779	10.0873	-2.18481	0.0392202	0.634756	-3.81281
SNORD10	0.20828	8.15308	2.1846	0.0392375	0.634756	-3.81317
RBM12	-0.267214	9.73525	-2.18203	0.0394492	0.636987	-3.81761
ASB7	0.147673	8.09406	2.18173	0.0394737	0.636987	-3.81812
SLC44A2	0.164578	11.2856	2.17859	0.0397336	0.640383	-3.82353
AMTN	0.216709	7.74464	2.1777	0.039808	0.640786	-3.82507
SLC9A6	1.04912	9.17419	2.17704	0.0398629	0.640873	-3.8262
LINC01011	-0.135801	8.64987	-2.17577	0.0399682	0.641769	-3.82837
SLCO3A1	0.161013	8.42974	2.1736	0.0401497	0.643187	-3.8321
NARS	-0.162312	12.2685	-2.17353	0.0401558	0.643187	-3.83223
TMEM120B	-0.146087	8.07324	-2.17275	0.0402208	0.643433	-3.83356
KBTBD2	0.146316	11.9795	2.17121	0.0403501	0.644006	-3.8362
LINC00092	-0.153785	8.4756	-2.1697	0.040478	0.644006	-3.83881
HELQ	0.155723	8.73612	2.16912	0.040527	0.644006	-3.83981
PROSC	-0.216178	10.6338	-2.16903	0.0405339	0.644006	-3.83995
NEK6	0.194202	9.99477	2.16879	0.0405542	0.644006	-3.84036
MPC1	0.891991	10.6256	2.16653	0.0407464	0.644006	-3.84425
MSLN	0.34789	10.6494	2.1665	0.0407482	0.644006	-3.84428
HIST1H2AM	0.177759	8.05314	2.16496	0.0408794	0.644006	-3.84693
DPCD	0.198921	9.01123	2.1638	0.040978	0.644006	-3.84891
PBX4	0.248747	8.26823	2.16375	0.0409823	0.644006	-3.849
KLC4	-0.163404	8.1884	-2.16369	0.0409877	0.644006	-3.84911
TONSL	-0.174151	7.96679	-2.16363	0.0409931	0.644006	-3.84921
KBTBD11	0.188561	8.3336	2.16359	0.0409963	0.644006	-3.84928
HIST3H3	-0.200564	7.84076	-2.1632	0.0410295	0.644006	-3.84994
PSD3	-0.234837	9.68385	-2.16217	0.0411177	0.644006	-3.85171
LMAN2	-0.243475	9.30258	-2.16211	0.0411225	0.644006	-3.85181
OSGIN1	0.663652	9.26569	2.16205	0.0411277	0.644006	-3.85191
CGRRF1	0.201484	10.5723	2.16178	0.0411512	0.644006	-3.85238
TMEM18	-0.174199	9.18486	-2.16089	0.0412274	0.64442	-3.8539
SBNO1	-0.237725	8.48701	-2.1591	0.0413812	0.646045	-3.85696
LARS	-0.163524	11.9465	-2.15828	0.0414516	0.646365	-3.85836
TGFB1I1	-0.213547	8.93838	-2.15702	0.0415605	0.647285	-3.86052
CEP290	-0.148793	8.99558	-2.15622	0.0416302	0.647592	-3.8619
RB1	-0.314733	9.28052	-2.15559	0.0416844	0.647657	-3.86296
PXN	-0.193629	9.86208	-2.1532	0.0418916	0.648087	-3.86704
EXPH5	0.148095	8.03501	2.15313	0.0418984	0.648087	-3.86717
RASIP1	0.172867	7.76465	2.15288	0.0419199	0.648087	-3.8676
LRRN1	0.131366	7.7745	2.15264	0.0419409	0.648087	-3.86801
FXYD5	-0.135516	7.99269	-2.15239	0.0419621	0.648087	-3.86842
NXF4	0.169443	7.5229	2.15009	0.0421631	0.649888	-3.87235
ZDHHC6	-0.184201	11.2449	-2.14991	0.042179	0.649888	-3.87266
VOPP1	-0.166525	9.79909	-2.14887	0.0422704	0.650522	-3.87444
HLA-F-AS1	0.183981	7.60904	2.14758	0.0423838	0.651494	-3.87664
TTC31	-0.214691	10.5639	-2.1441	0.0426905	0.653766	-3.88256
CXCL8	0.435866	12.3529	2.1435	0.042744	0.653766	-3.88359
MEIS3P1	0.217151	8.89514	2.14266	0.0428186	0.653766	-3.88502
MECP2	-0.178047	8.62054	-2.14215	0.0428637	0.653766	-3.88588
EGR2	0.156836	7.8541	2.14002	0.0430536	0.653766	-3.88951
NGEF	0.202285	8.18865	2.13985	0.0430689	0.653766	-3.8898
DKK3	0.18215	8.35895	2.13976	0.0430768	0.653766	-3.88995
LINC01549	-0.167101	8.08289	-2.13914	0.0431321	0.653766	-3.89101
BTRC	-0.167103	8.39921	-2.13856	0.0431837	0.653766	-3.89199
POLR2J	0.162525	8.38975	2.13813	0.0432221	0.653766	-3.89272
ATG16L2	-0.220509	9.23286	-2.1381	0.0432252	0.653766	-3.89278
GDPD5	0.167091	9.49721	2.13807	0.0432274	0.653766	-3.89282
EFEMP2	0.185709	8.28489	2.13774	0.0432572	0.653766	-3.89338
CDC42SE2	-0.927041	9.13837	-2.1376	0.04327	0.653766	-3.89363
ACOT4	0.201061	8.99038	2.13695	0.0433281	0.653766	-3.89473
SMIM14	0.154148	11.8706	2.13624	0.0433915	0.653766	-3.89593
SAT1	0.233703	12.7262	2.13608	0.0434064	0.653766	-3.89621
CSPG4	0.268703	9.04395	2.13571	0.0434398	0.653766	-3.89684
USP13	-0.141529	10.7405	-2.13357	0.0436327	0.654685	-3.90048
EFEMP1	-0.564903	9.31231	-2.13306	0.043678	0.654685	-3.90133
TMEM132A	0.220265	9.96509	2.13258	0.0437216	0.654685	-3.90214
HCFC1	-0.210621	12.2848	-2.13235	0.0437429	0.654685	-3.90255
ZNF148	0.208502	11.2387	2.13223	0.0437534	0.654685	-3.90274
CDRT4	0.18459	10.1621	2.13146	0.0438234	0.654975	-3.90405
SH3PXD2A	-0.199002	11.8836	-2.13083	0.0438803	0.65507	-3.90512
EMC8	0.158351	9.55056	2.12933	0.0440169	0.656353	-3.90767
MIR22HG	0.203179	10.4794	2.12832	0.0441086	0.656965	-3.90937
C5	-0.156485	8.73881	-2.1273	0.0442014	0.657591	-3.9111
CLASP2	-0.217529	9.87045	-2.12628	0.0442948	0.657875	-3.91283
ANKRD27	-0.199493	9.29475	-2.12592	0.0443276	0.657875	-3.91343
LINC00950	0.140902	7.82687	2.12543	0.0443728	0.657875	-3.91427
FAM155B	-0.214761	7.8202	-2.12353	0.044547	0.659703	-3.91748
SNAPC1	0.921903	11.0078	2.1226	0.0446333	0.660031	-3.91907
PRICKLE2	-0.17956	10.3524	-2.12219	0.044671	0.660031	-3.91976
RBM47	0.1383	7.69547	2.12069	0.0448091	0.660887	-3.92229
LOC646836	0.281397	8.76874	2.12046	0.044831	0.660887	-3.92269
ABT1	-0.174276	8.85811	-2.1168	0.0451703	0.661753	-3.92886
NEURL4	-0.188058	8.60508	-2.11658	0.0451908	0.661753	-3.92923
CD59	-0.190038	9.4259	-2.1152	0.0453194	0.661753	-3.93156
CDK19	-0.163306	10.5466	-2.11519	0.0453204	0.661753	-3.93158
DNMBP	-0.170717	8.11081	-2.11464	0.0453722	0.661753	-3.93252
CYP26B1	-0.197081	10.9677	-2.11401	0.0454314	0.661753	-3.93358
CYB561	0.147936	7.71849	2.11387	0.0454442	0.661753	-3.93382
MNT	-0.192784	10.5678	-2.11367	0.0454624	0.661753	-3.93414
FAM189A2	0.151875	7.73206	2.11319	0.0455082	0.661753	-3.93497
FIZ1	-0.131678	9.1317	-2.11316	0.0455106	0.661753	-3.93501
DCAF8	0.238453	11.1984	2.11268	0.0455553	0.661753	-3.93581
TMCO3	-0.16222	10.6148	-2.11258	0.0455646	0.661753	-3.93598
PSME3	-0.151416	11.3331	-2.1116	0.0456567	0.661753	-3.93763
GNGT2	0.250096	8.52824	2.1107	0.0457415	0.661753	-3.93915
CPT1A	-0.169799	8.61752	-2.11006	0.0458017	0.661753	-3.94023
GPATCH3	0.204876	8.66407	2.10986	0.0458212	0.661753	-3.94058
CNGA3	-0.145366	7.79381	-2.10905	0.0458978	0.661753	-3.94194
ZFHX4	-0.199629	7.91775	-2.10895	0.0459069	0.661753	-3.94211
MTR	0.193427	9.81546	2.1089	0.0459115	0.661753	-3.94219
GSTM2	0.324062	10.3182	2.10706	0.0460861	0.661753	-3.94529
CEP83	0.932422	9.20011	2.10599	0.0461873	0.661753	-3.94709
FBXO11	-0.186862	8.66051	-2.1052	0.0462625	0.661753	-3.94842
TFAP2C	0.241406	8.7137	2.10518	0.0462643	0.661753	-3.94845
MAGEC2	0.221582	9.44141	2.10445	0.0463345	0.661753	-3.94969
OMA1	-0.195283	9.21617	-2.10431	0.0463475	0.661753	-3.94992
TEX261	-0.143818	9.36353	-2.10428	0.04635	0.661753	-3.94997
ARHGAP32	-0.212997	11.2113	-2.10418	0.0463599	0.661753	-3.95014
TRIM22	0.278363	8.13323	2.104	0.046377	0.661753	-3.95044
RBKS	0.23236	9.56038	2.1037	0.0464057	0.661753	-3.95095
ZNF462	0.170413	10.5393	2.10353	0.0464218	0.661753	-3.95123
PCIF1	-0.160908	8.80363	-2.10252	0.0465179	0.662111	-3.95292
XKR8	0.148199	9.18701	2.10176	0.0465915	0.662111	-3.95422
GLIDR	-0.202611	8.53352	-2.10166	0.0466002	0.662111	-3.95437
PCDHAC2	0.177461	7.99558	2.09939	0.0468185	0.664484	-3.95819
CKLF	0.154663	13.2596	2.09792	0.0469601	0.664707	-3.96066
GLRX2	0.359548	9.24359	2.09731	0.047019	0.664707	-3.96169
PSMB1	0.112047	14.0129	2.09661	0.0470869	0.664707	-3.96287
OR1K1	-0.169639	7.85363	-2.09652	0.0470949	0.664707	-3.963
SIRT5	-0.26094	9.61073	-2.09622	0.0471246	0.664707	-3.96352
CETN2	-0.155433	12.6554	-2.09557	0.0471874	0.664707	-3.96461
EDN1	0.269617	11.558	2.09551	0.0471932	0.664707	-3.96471
SLC12A5	-0.202223	7.756	-2.09438	0.0473024	0.665521	-3.9666
CYGB	-0.162191	7.80734	-2.09359	0.0473793	0.66588	-3.96792
TAAR1	0.136735	7.66764	2.09215	0.0475199	0.667133	-3.97035
COL9A2	0.155214	7.80529	2.09093	0.047639	0.668043	-3.97239
TARS	-0.179288	12.6314	-2.09041	0.0476899	0.668043	-3.97326
GPAA1	-0.260921	10.6594	-2.0899	0.0477395	0.668043	-3.97411
MYO10	-0.201777	11.4353	-2.08851	0.0478755	0.668085	-3.97644
MPP4	-0.227182	9.16292	-2.08827	0.0478994	0.668085	-3.97684
AAED1	0.155614	10.1677	2.08785	0.0479404	0.668085	-3.97754
LOC728673	-0.139052	7.9145	-2.0873	0.0479945	0.668085	-3.97846
LOC100506691	0.215495	7.98692	2.08724	0.0480002	0.668085	-3.97856
PPP2R5C	-0.153476	8.10464	-2.08627	0.0480961	0.668701	-3.98019
ANKRD28	-0.197291	9.43193	-2.0847	0.0482506	0.67013	-3.98281
FUT8	-0.249283	11.6166	-2.08236	0.0484828	0.672634	-3.98673
AKT2	-0.271434	8.07517	-2.08033	0.0486845	0.67471	-3.99012
APOLD1	0.182596	7.95545	2.07851	0.0488665	0.675782	-3.99316
TRIM47	0.181952	9.27494	2.07736	0.0489808	0.675782	-3.99507
ZNF585A	0.20837	9.06487	2.07708	0.0490091	0.675782	-3.99554
SUSD6	0.174917	9.27801	2.07697	0.0490202	0.675782	-3.99572
NXN	0.219749	8.44875	2.07676	0.0490413	0.675782	-3.99608
TLE4	-0.261631	8.20353	-2.07618	0.0490996	0.675782	-3.99704
SNORD8	0.242777	8.07652	2.07584	0.0491337	0.675782	-3.99761
SNHG9	0.199997	10.7449	2.07491	0.0492275	0.675782	-3.99917
KDM5B	0.182256	11.0623	2.07469	0.0492492	0.675782	-3.99953
LOC285074	0.473988	9.90866	2.07435	0.0492834	0.675782	-4.00009
ADAM10	-0.678791	9.20828	-2.07329	0.04939	0.676339	-4.00185
MAGED1	0.152395	12.5022	2.07207	0.0495137	0.676339	-4.00389
NPIPB8	0.446798	8.62896	2.0713	0.0495909	0.676339	-4.00516
NCALD	0.16683	7.69539	2.07129	0.0495924	0.676339	-4.00519
C4orf33	0.164553	8.78476	2.07083	0.0496392	0.676339	-4.00596
EIF2B1	0.114858	11.1056	2.07057	0.0496657	0.676339	-4.00639
MCM5	-0.211026	10.6535	-2.07016	0.0497069	0.676339	-4.00707
C14orf79	0.213378	8.83126	2.06975	0.049749	0.676339	-4.00776
PKIA	0.788047	8.50833	2.06931	0.0497938	0.676339	-4.00849
VWA8	-0.127428	7.93004	-2.06766	0.049961	0.676983	-4.01123
VEPH1	-0.164903	8.18584	-2.06713	0.050015	0.676983	-4.01211
OSBPL7	0.711473	8.14183	2.06679	0.0500499	0.676983	-4.01267
ABCF2	0.43962	9.09466	2.06679	0.0500502	0.676983	-4.01268
CCL28	0.16821	7.97699	2.06574	0.0501571	0.677723	-4.01442
TM7SF3	-0.178907	10.5304	-2.0643	0.0503048	0.677944	-4.01682
FUZ	0.166096	8.00865	2.06399	0.0503367	0.677944	-4.01733
COL6A2	0.381539	8.74521	2.06398	0.0503377	0.677944	-4.01735
ZNF571	0.15003	8.15891	2.06289	0.0504492	0.677944	-4.01915
MAPK6	-0.193976	10.5547	-2.06204	0.0505373	0.677944	-4.02057
GLIPR2	0.166176	10.0937	2.06155	0.0505878	0.677944	-4.02138
TNS1	-0.212821	8.54786	-2.06147	0.0505958	0.677944	-4.02151
POLR2G	0.128876	12.8957	2.06115	0.050629	0.677944	-4.02205
NT5E	-0.191031	13.0784	-2.061	0.0506444	0.677944	-4.0223
NFYC	-0.195162	10.4889	-2.05911	0.05084	0.679861	-4.02544
CHKB	-0.167129	9.40272	-2.05812	0.050942	0.679987	-4.02707
BTG1	-0.181626	13.8348	-2.05798	0.0509564	0.679987	-4.0273
SLC25A5	-0.130767	14.7445	-2.057	0.051059	0.679987	-4.02894
PSG4	0.165701	8.08599	2.05699	0.0510593	0.679987	-4.02894
OSBP	0.115199	12.208	2.05642	0.051119	0.680083	-4.02989
USP4	0.457155	8.64685	2.05384	0.0513883	0.682227	-4.03417
KIAA1467	-0.167591	8.28599	-2.05334	0.0514403	0.682227	-4.03499
SEC31A	0.206286	8.84519	2.05254	0.0515239	0.682227	-4.03631
POLDIP3	-0.17566	7.90466	-2.05246	0.051532	0.682227	-4.03644
LIN7C	-0.246144	9.04563	-2.05223	0.0515568	0.682227	-4.03683
CREBRF	0.208286	9.99794	2.05185	0.0515961	0.682227	-4.03745
SEC22C	-0.206132	9.68104	-2.05128	0.0516559	0.682321	-4.03839
CIC	-0.228584	9.58421	-2.04951	0.0518425	0.68378	-4.04133
OPHN1	-0.228401	8.55034	-2.04923	0.0518719	0.68378	-4.04179
RORB	0.225615	7.54082	2.04724	0.0520817	0.683793	-4.04507
SFTA3	0.254465	8.06759	2.047	0.0521076	0.683793	-4.04548
VMP1	-0.169556	12.9245	-2.04675	0.0521335	0.683793	-4.04588
DBIL5P	-0.289145	7.63285	-2.04601	0.0522121	0.683793	-4.04711
CCND3	0.16811	12.5504	2.04483	0.0523374	0.683793	-4.04906
ADAMTS15	-0.141007	7.85414	-2.0447	0.0523514	0.683793	-4.04927
ENDOD1	-0.224411	10.0632	-2.04415	0.0524102	0.683793	-4.05019
APCDD1L	-0.172609	13.9571	-2.04359	0.0524701	0.683793	-4.05112
TTPAL	-0.153203	10.8202	-2.04348	0.0524808	0.683793	-4.05128
HSD11B1L	0.159237	8.3906	2.04301	0.0525313	0.683793	-4.05206
CXCL2	0.386619	8.43059	2.04297	0.0525355	0.683793	-4.05213
LOC441087	0.199076	13.9695	2.04296	0.0525367	0.683793	-4.05215
BUD31	0.125299	12.1105	2.04212	0.0526259	0.683793	-4.05353
LRRC29	0.154674	7.94945	2.0416	0.0526819	0.683793	-4.05439
DUS4L	0.190751	9.36071	2.04136	0.0527078	0.683793	-4.05479
KLRC3	0.173895	7.84305	2.04127	0.0527171	0.683793	-4.05493
CLASRP	-0.17841	8.92514	-2.04066	0.0527829	0.68396	-4.05595
ZBTB14	-0.134515	9.60942	-2.03998	0.0528552	0.684214	-4.05706
PHF10	-0.177556	9.09553	-2.03935	0.0529229	0.684406	-4.0581
PHLDB3	0.179469	8.17023	2.03684	0.0531931	0.68693	-4.06224
SOGA1	0.515611	8.53103	2.03654	0.0532248	0.68693	-4.06272
INSC	0.179546	8.02698	2.03606	0.0532771	0.68693	-4.06352
CENPBD1P1	-0.224504	8.50589	-2.03506	0.0533847	0.687633	-4.06516
FZD2	0.165406	11.6764	2.03131	0.0537922	0.68887	-4.07133
PCNT	-0.163359	11.4958	-2.03033	0.0538989	0.68887	-4.07294
SNORD34	0.213095	7.97589	2.03022	0.0539109	0.68887	-4.07312
RPL36	0.232473	8.7591	2.03001	0.0539333	0.68887	-4.07346
HIVEP3	-0.190133	9.40925	-2.03001	0.0539341	0.68887	-4.07347
SLC25A3	-0.159518	8.58325	-2.02976	0.0539612	0.68887	-4.07388
SLC7A5	-0.213483	12.2432	-2.0292	0.0540216	0.68887	-4.07479
CD8A	0.172883	8.06969	2.02895	0.0540495	0.68887	-4.07521
RPL23AP82	0.143062	8.24223	2.02859	0.0540887	0.68887	-4.0758
IDS	0.254467	8.72383	2.02796	0.0541583	0.68887	-4.07684
TPMT	0.156743	9.49894	2.02765	0.0541922	0.68887	-4.07735
NT5DC2	-0.21745	10.4107	-2.02752	0.0542057	0.68887	-4.07755
LYG2	0.180649	7.61068	2.02677	0.0542885	0.68887	-4.07879
UBE2J1	0.167865	10.3504	2.02644	0.0543245	0.68887	-4.07933
S100A2	0.3196	8.82624	2.02623	0.0543476	0.68887	-4.07967
RHOQ	0.213471	10.7618	2.02595	0.0543782	0.68887	-4.08013
ENDOV	0.257606	8.90348	2.02413	0.0545784	0.68887	-4.08311
KCNMB2	0.168881	8.39554	2.02336	0.0546633	0.68887	-4.08437
C2	0.160813	7.69333	2.02293	0.0547113	0.68887	-4.08508
ATXN2L	-0.240483	9.14149	-2.02291	0.0547136	0.68887	-4.08512
PHIP	-0.224156	9.56409	-2.02233	0.0547772	0.68887	-4.08606
LINC01098	-0.154395	7.69682	-2.02196	0.0548181	0.68887	-4.08667
NOLC1	-0.135318	10.1722	-2.02185	0.0548304	0.68887	-4.08685
PINK1	0.161326	10.9627	2.02096	0.05493	0.68887	-4.08832
UBA2	-0.192373	8.8901	-2.02077	0.0549508	0.68887	-4.08863
FLNC	0.255464	11.7043	2.02043	0.054988	0.68887	-4.08918
LRRC75A-AS1	0.136882	13.9777	2.01975	0.0550642	0.68887	-4.0903
IL11RA	-0.972862	8.63681	-2.01974	0.0550655	0.68887	-4.09032
TMEM38A	0.157422	8.04202	2.01922	0.055123	0.68887	-4.09117
TMTC2	-0.180749	8.11843	-2.01868	0.0551829	0.68887	-4.09205
SGK494	-0.172548	8.396	-2.01821	0.0552356	0.68887	-4.09282
MED12	-0.203779	9.49564	-2.01802	0.055257	0.68887	-4.09313
PLD3	-0.187314	8.24346	-2.0177	0.0552921	0.68887	-4.09365
FAH	-0.177394	9.50584	-2.01614	0.0554663	0.68887	-4.0962
ARMCX3	0.182062	9.71382	2.01514	0.055578	0.68887	-4.09783
YOD1	0.203744	10.0324	2.0149	0.0556057	0.68887	-4.09823
NUFIP2	0.273847	10.1076	2.01457	0.0556429	0.68887	-4.09878
ARL6IP4	-0.660309	9.34362	-2.01413	0.0556914	0.68887	-4.09948
FIGNL1	-0.181192	9.39117	-2.01397	0.0557098	0.68887	-4.09975
DEPTOR	-0.118456	7.74806	-2.01345	0.0557686	0.68887	-4.1006
PPP1R11	-0.148496	12.3894	-2.01317	0.0557996	0.68887	-4.10105
RRP15	0.158209	11.0709	2.01311	0.0558067	0.68887	-4.10116
RFC2	-0.214189	9.23908	-2.01305	0.0558136	0.68887	-4.10126
ZHX1	-0.188106	8.69621	-2.01255	0.0558697	0.68887	-4.10207
RBM18	0.492859	9.40747	2.01252	0.055873	0.68887	-4.10212
ZKSCAN4	0.145236	9.28694	2.01016	0.0561395	0.690668	-4.10598
NPIPA1	0.304856	9.20393	2.00978	0.0561818	0.690668	-4.10659
DNAJB9	0.232405	10.4211	2.00877	0.0562962	0.690668	-4.10823
PRKAB2	0.157096	9.29491	2.00848	0.0563293	0.690668	-4.10871
HEATR5A	-0.152503	8.85797	-2.00813	0.0563688	0.690668	-4.10928
ISOC1	-0.17233	10.5888	-2.0079	0.0563951	0.690668	-4.10966
ZNF564	0.156474	9.37587	2.00742	0.0564495	0.690668	-4.11044
CSK	-0.174236	11.7878	-2.00679	0.0565219	0.690668	-4.11147
ENTPD6	0.419002	8.3278	2.00661	0.0565414	0.690668	-4.11175
ENG	0.207728	8.24889	2.00536	0.0566842	0.690668	-4.1138
DOC2A	-0.168096	8.11376	-2.00524	0.0566978	0.690668	-4.11399
SLC36A1	-0.146211	9.40733	-2.00518	0.0567045	0.690668	-4.11409
TMEM140	0.118652	7.96989	2.00504	0.0567211	0.690668	-4.11432
CLDN7	0.222268	11.377	2.00322	0.0569292	0.690668	-4.11729
VSTM2L	0.213424	7.88427	2.00213	0.0570543	0.690668	-4.11906
IDNK	0.185299	9.45648	2.00171	0.0571015	0.690668	-4.11973
FOSB	0.165933	8.80543	2.00113	0.0571685	0.690668	-4.12068
MEX3A	0.15493	8.69672	2.00105	0.0571773	0.690668	-4.12081
IL13RA2	-0.38285	9.33705	-1.99998	0.0573004	0.690668	-4.12255
RECQL	-0.364673	9.38625	-1.99974	0.057329	0.690668	-4.12295
ELP4	-0.19701	9.37658	-1.99965	0.0573386	0.690668	-4.12309
RTTN	-0.153186	9.94195	-1.99912	0.0574001	0.690668	-4.12395
DNASE2	0.136612	11.3118	1.99903	0.0574105	0.690668	-4.1241
UBASH3B	-0.272125	9.47351	-1.99853	0.0574676	0.690668	-4.12491
MARK3	-0.183317	9.88644	-1.99779	0.0575542	0.690668	-4.12612
SLC35E2B	-0.200679	11.0415	-1.99747	0.0575907	0.690668	-4.12664
LYPLAL1	0.311247	9.69258	1.99729	0.0576118	0.690668	-4.12693
NAP1L4	-0.170584	12.8029	-1.99698	0.057647	0.690668	-4.12743
WBSCR22	0.18275	10.6496	1.99673	0.0576758	0.690668	-4.12783
STARD10	0.220424	9.94485	1.99643	0.0577106	0.690668	-4.12832
SNRPF	-0.131879	13.7781	-1.99636	0.0577188	0.690668	-4.12843
SENP7	-0.379175	9.51213	-1.99527	0.0578459	0.690668	-4.13021
CHURC1	0.142863	10.1028	1.9952	0.0578533	0.690668	-4.13032
TGIF2LY	-0.148195	7.75385	-1.9951	0.0578654	0.690668	-4.13048
ZNF613	0.207503	9.39642	1.9944	0.0579464	0.690668	-4.13162
HLA-E	0.190979	12.456	1.99394	0.0580003	0.690668	-4.13237
PLAU	-0.176652	14.5497	-1.99305	0.0581043	0.690668	-4.13382
OBP2B	-0.238938	7.74023	-1.99278	0.058136	0.690668	-4.13426
SCARF2	0.158615	8.07517	1.99255	0.0581626	0.690668	-4.13463
ENPP4	0.228271	9.65616	1.99225	0.0581973	0.690668	-4.13511
NUDT6	0.186249	8.81001	1.99219	0.0582042	0.690668	-4.13521
C1RL	0.179155	7.79181	1.99136	0.0583013	0.691188	-4.13655
ID1	0.95912	9.01275	1.98967	0.0584996	0.692209	-4.1393
IMMT	-0.128288	12.1627	-1.98955	0.0585129	0.692209	-4.13948
ZNF443	0.152916	9.43169	1.98926	0.0585477	0.692209	-4.13996
OPN3	-0.194212	9.46108	-1.98849	0.0586372	0.692635	-4.1412
MEMO1	-0.194904	9.78955	-1.98801	0.0586945	0.692681	-4.14199
DENND2C	0.216358	8.44788	1.9875	0.0587539	0.69275	-4.1428
LOX	0.322302	10.689	1.98645	0.0588784	0.693588	-4.14452
ECM1	0.262287	9.08813	1.98597	0.0589348	0.693621	-4.14529
MCM3AP-AS1	-0.173121	8.29853	-1.98517	0.0590293	0.693786	-4.14658
PLK1	-0.183425	8.74881	-1.98494	0.0590559	0.693786	-4.14695
MAGI1	-0.151966	7.95436	-1.98379	0.0591924	0.694761	-4.14881
UNC119B	-0.15871	9.15559	-1.98311	0.0592726	0.694794	-4.14991
HACL1	0.165435	10.9969	1.98286	0.0593025	0.694794	-4.15031
DUSP28	0.141854	9.32234	1.98223	0.0593772	0.69504	-4.15133
OGG1	-0.158754	9.39764	-1.9808	0.0595482	0.695228	-4.15365
LRRC20	0.182959	9.07387	1.98027	0.0596107	0.695228	-4.1545
TEX30	-0.251563	10.6039	-1.97973	0.0596754	0.695228	-4.15537
KIAA0196	-0.13898	10.1841	-1.97946	0.0597077	0.695228	-4.15581
HMGB1P1	-0.26357	11.9334	-1.97944	0.0597097	0.695228	-4.15584
HNRNPA3P1	-0.271629	8.87906	-1.97832	0.0598439	0.695228	-4.15765
HIST3H2A	-0.225763	8.12615	-1.97828	0.0598491	0.695228	-4.15772
TAF4	-0.235382	10.5559	-1.97764	0.0599257	0.695228	-4.15875
RPE	-0.201253	10.4634	-1.97762	0.0599275	0.695228	-4.15878
MED6	0.115859	11.7962	1.9776	0.0599297	0.695228	-4.15881
FAM168B	-0.160601	9.78926	-1.97504	0.060238	0.696659	-4.16295
DPY19L1	-0.156178	12.4034	-1.97493	0.0602507	0.696659	-4.16312
PMF1	0.18564	9.14065	1.97489	0.0602555	0.696659	-4.16318
MAT2A	-0.148084	13.6528	-1.9745	0.0603023	0.696659	-4.16381
CNN3	0.1344	13.2508	1.97434	0.0603219	0.696659	-4.16407
TMEM158	-0.279698	13.7073	-1.97246	0.0605484	0.698082	-4.16709
SASH1	-0.320681	10.3435	-1.97243	0.0605529	0.698082	-4.16715
C19orf33	0.304742	12.5748	1.97197	0.0606083	0.698099	-4.16789
PTGES	0.204817	8.30406	1.97062	0.0607717	0.698795	-4.17006
PSMB3	0.129744	13.3149	1.97058	0.0607765	0.698795	-4.17013
SFT2D2	-0.157869	8.19428	-1.9696	0.0608957	0.699322	-4.17171
PRKCZ	0.1924	8.0151	1.96908	0.0609583	0.699322	-4.17254
RBL1	-0.164927	9.27606	-1.96887	0.0609842	0.699322	-4.17288
KRIT1	-0.17046	9.16397	-1.96748	0.0611536	0.699394	-4.17512
PRRX1	-0.259276	8.37313	-1.96656	0.0612657	0.699394	-4.17659
ATP6V0D2	0.198134	7.83459	1.96618	0.0613127	0.699394	-4.17721
PLD5	0.171498	7.69038	1.96604	0.0613292	0.699394	-4.17743
MLLT11	0.142634	9.7443	1.96501	0.0614558	0.699394	-4.17909
ANTXR2	-0.129252	12.8894	-1.96477	0.061485	0.699394	-4.17947
POLB	0.179029	10.0299	1.96463	0.0615028	0.699394	-4.17971
SDCCAG3	-0.123731	8.08872	-1.96416	0.0615593	0.699394	-4.18045
TTYH3	-0.150142	9.72048	-1.96402	0.0615772	0.699394	-4.18068
GLRX3	-0.158052	7.78277	-1.96374	0.0616112	0.699394	-4.18113
IDH1	-0.183224	9.66221	-1.96357	0.0616318	0.699394	-4.1814
PPP1R12B	-0.199903	8.63154	-1.96341	0.0616519	0.699394	-4.18166
PTPRR	0.197787	9.58421	1.96265	0.0617455	0.699394	-4.18288
OSCP1	0.172505	7.99306	1.96264	0.0617462	0.699394	-4.18289
ARSD	0.185944	8.31413	1.95967	0.0621127	0.701953	-4.18766
RNF112	0.121483	8.2744	1.95961	0.0621205	0.701953	-4.18776
CHST3	0.202684	9.6609	1.95949	0.0621346	0.701953	-4.18794
TRMT2B	-0.165475	8.60333	-1.95865	0.062239	0.70252	-4.18929
SNORD12	0.16015	8.10876	1.95657	0.0624974	0.704823	-4.19263
ZNF415	0.185134	8.47835	1.95483	0.0627141	0.706146	-4.19542
SDSL	0.233084	10.618	1.95475	0.0627237	0.706146	-4.19554
BEX5	0.168768	7.61181	1.95288	0.0629576	0.708164	-4.19854
PHLDA1	-0.800646	13.5645	-1.95221	0.0630417	0.70828	-4.19961
HHIP	0.178428	8.75638	1.9519	0.0630805	0.70828	-4.20011
FAS	0.155598	7.68433	1.95149	0.063132	0.70828	-4.20076
MCM10	-0.184368	8.83519	-1.94984	0.0633389	0.708462	-4.2034
ASB1	-0.196297	11.1406	-1.94865	0.0634891	0.708462	-4.2053
IGFBP5	-0.206252	7.97692	-1.94824	0.0635401	0.708462	-4.20595
CARM1	-0.20593	12.6317	-1.94767	0.063612	0.708462	-4.20686
RMDN3	-0.14435	10.9031	-1.9474	0.0636474	0.708462	-4.2073
LRP5L	0.248707	9.05279	1.94738	0.0636491	0.708462	-4.20733
UBE3C	-0.18605	12.0168	-1.94692	0.0637072	0.708462	-4.20806
REM2	-0.154274	8.03493	-1.94684	0.0637171	0.708462	-4.20818
SNPH	-0.146375	8.41784	-1.94649	0.0637619	0.708462	-4.20875
TUBB	-0.121729	13.9984	-1.94645	0.0637663	0.708462	-4.20881
ALDOB	-0.173929	8.21681	-1.94631	0.0637845	0.708462	-4.20903
MARCKSL1	-0.210036	12.5508	-1.9453	0.0639123	0.708462	-4.21064
ZNF367	-0.177364	8.04723	-1.94505	0.0639446	0.708462	-4.21105
GABARAPL1	0.143505	9.96205	1.94419	0.0640541	0.708462	-4.21243
NTN4	0.244855	9.11839	1.94363	0.0641249	0.708462	-4.21331
CSTF3	-0.43433	9.75971	-1.94361	0.0641272	0.708462	-4.21334
HLA-DOB	0.165335	7.64287	1.94346	0.0641459	0.708462	-4.21358
HEXIM2	0.210337	9.2126	1.94336	0.0641587	0.708462	-4.21374
TUBB2B	-0.406356	10.0118	-1.94283	0.0642266	0.708462	-4.21459
VPS9D1	0.189498	8.90863	1.94246	0.0642741	0.708462	-4.21518
PEX1	-0.20895	8.89135	-1.94211	0.0643178	0.708462	-4.21573
TPST2	0.14042	12.1013	1.94171	0.0643691	0.708462	-4.21637
TMCO1	0.145085	12.597	1.94143	0.0644056	0.708462	-4.21683
TTC1	0.139084	10.7673	1.93997	0.0645914	0.709535	-4.21914
RAB2A	-0.16244	9.72282	-1.93944	0.0646595	0.709535	-4.21999
KLF4	0.429501	9.94347	1.93938	0.0646675	0.709535	-4.22009
MSH6	-0.121284	12.1943	-1.93615	0.0650824	0.71296	-4.22522
ANKDD1A	0.200103	8.79805	1.9356	0.0651531	0.71296	-4.2261
TAF9B	-0.251678	8.98664	-1.93535	0.0651854	0.71296	-4.22649
NOA1	0.109707	10.8036	1.93459	0.0652833	0.71296	-4.2277
MZF1	-0.20502	11.0707	-1.93453	0.0652912	0.71296	-4.2278
UCA1	0.258555	9.61873	1.93368	0.0654012	0.71296	-4.22915
MN1	0.128853	8.08855	1.93344	0.0654323	0.71296	-4.22953
ARPIN	-0.190006	8.78465	-1.93301	0.0654881	0.71296	-4.23022
FURIN	-0.235954	9.46012	-1.93269	0.0655289	0.71296	-4.23072
PHF14	-0.217747	9.69064	-1.93245	0.0655609	0.71296	-4.23111
SNORA68	0.173788	7.91948	1.93226	0.0655848	0.71296	-4.2314
NACC1	-0.248954	9.55667	-1.93015	0.0658598	0.715349	-4.23476
NAMPT	-0.892178	9.12356	-1.92961	0.0659303	0.715515	-4.23562
THUMPD1	-0.187987	8.59962	-1.92712	0.0662548	0.716607	-4.23956
C6orf163	0.138217	7.82222	1.92644	0.0663439	0.716607	-4.24064
AIM2	0.225851	9.13744	1.92635	0.0663559	0.716607	-4.24078
QPCTL	0.130316	8.00507	1.92625	0.0663695	0.716607	-4.24095
ADAM19	-0.184439	12.591	-1.92536	0.0664853	0.716607	-4.24235
HSPE1	-0.67083	12.5408	-1.92427	0.0666295	0.716607	-4.24408
ANKRD52	-0.17526	8.41254	-1.92416	0.0666438	0.716607	-4.24425
NOL10	-0.177536	8.34385	-1.92415	0.0666453	0.716607	-4.24427
RUNX1	-0.206578	10.5376	-1.92342	0.0667415	0.716607	-4.24543
OR13C4	-0.160757	7.50668	-1.92339	0.0667444	0.716607	-4.24547
ZBTB6	0.235208	7.97567	1.92284	0.0668167	0.716607	-4.24633
WDR12	-0.148484	10.6908	-1.92271	0.066835	0.716607	-4.24655
GATS	0.196758	8.1704	1.92125	0.0670268	0.716607	-4.24885
TSTA3	0.154141	9.76902	1.9209	0.0670735	0.716607	-4.24941
FBLIM1	0.12579	8.02097	1.92068	0.0671023	0.716607	-4.24975
FBXL17	-0.17126	8.16608	-1.92068	0.0671025	0.716607	-4.24976
ANO3	0.140268	7.63216	1.9205	0.0671262	0.716607	-4.25004
MED17	-0.145801	8.70389	-1.92037	0.0671439	0.716607	-4.25025
DHX32	0.124879	10.9872	1.91915	0.0673054	0.716607	-4.25218
PSMB6	0.126582	13.9005	1.91878	0.0673547	0.716607	-4.25276
HSPBP1	-0.166875	9.16302	-1.9178	0.0674852	0.716607	-4.25431
IGSF1	0.149461	7.77175	1.91718	0.0675676	0.716607	-4.25529
GPBP1L1	0.585742	9.32277	1.91699	0.0675923	0.716607	-4.25559
PCSK5	-0.239137	8.96743	-1.91693	0.0676002	0.716607	-4.25568
PNPLA6	-0.185058	12.2681	-1.91627	0.0676882	0.716607	-4.25672
TPM3P9	-0.199538	9.33889	-1.91598	0.0677275	0.716607	-4.25719
TBC1D15	0.133683	9.97413	1.91597	0.0677289	0.716607	-4.2572
CBX7	-0.179064	9.65641	-1.91584	0.0677462	0.716607	-4.25741
FSTL3	0.205712	10.2206	1.91573	0.0677601	0.716607	-4.25757
SLC5A6	-0.147335	10.7467	-1.91437	0.0679429	0.716607	-4.25973
PPIP5K1	-0.158371	9.27267	-1.91429	0.0679527	0.716607	-4.25985
RNF152	-0.13219	7.76419	-1.91429	0.0679533	0.716607	-4.25985
TXLNG	-0.184182	9.10516	-1.91411	0.0679772	0.716607	-4.26014
RPL10A	0.0968044	14.998	1.91392	0.0680024	0.716607	-4.26043
ACO2	0.136635	9.56665	1.91376	0.0680237	0.716607	-4.26068
LINC00667	0.172311	8.22166	1.91371	0.0680302	0.716607	-4.26076
CCL26	0.376855	9.46713	1.91336	0.0680772	0.716607	-4.26131
BPNT1	0.149184	8.51426	1.91246	0.0681984	0.716656	-4.26274
HK1	-0.15327	7.85646	-1.9121	0.0682465	0.716656	-4.2633
CTSV	0.160206	8.80671	1.91169	0.0683018	0.716656	-4.26395
ALDH2	0.18721	9.71978	1.91168	0.068303	0.716656	-4.26396
ATIC	-0.11297	12.6286	-1.91126	0.0683592	0.716665	-4.26462
VMA21	-0.141636	12.194	-1.91055	0.0684548	0.717088	-4.26574
C1orf228	0.172726	7.57953	1.90859	0.0687201	0.719285	-4.26884
SAT2	0.154238	10.6296	1.9081	0.0687859	0.719304	-4.26961
BTBD6	-0.127736	11.6584	-1.90746	0.0688732	0.719304	-4.27062
EMC3	0.117486	11.7209	1.9072	0.0689073	0.719304	-4.27102
RNU4ATAC	0.2047	8.4975	1.90651	0.0690018	0.719304	-4.27211
TBX22	0.126089	7.89465	1.90637	0.0690198	0.719304	-4.27232
BAIAP2L1	0.195424	9.54005	1.90611	0.0690549	0.719304	-4.27273
CRYGA	-0.128108	7.77084	-1.90537	0.0691554	0.719323	-4.27389
GJA3	-0.166946	8.52243	-1.90522	0.0691769	0.719323	-4.27414
ENO1	-0.109322	15.1224	-1.9045	0.0692738	0.719323	-4.27526
RPL18A	0.0856237	15.5205	1.90439	0.0692888	0.719323	-4.27544
ZNF679	0.179284	7.66818	1.90236	0.0695655	0.719323	-4.27862
ARHGAP33	-0.267506	9.76919	-1.90196	0.0696206	0.719323	-4.27926
ROGDI	0.145534	7.90741	1.90194	0.0696237	0.719323	-4.27929
HCG4	0.239848	12.386	1.90049	0.0698221	0.719323	-4.28157
GAD1	0.149571	9.69174	1.90033	0.0698435	0.719323	-4.28181
COL12A1	0.232092	9.32919	1.89971	0.0699293	0.719323	-4.2828
MPP5	0.148871	10.7079	1.89911	0.0700109	0.719323	-4.28373
LARP1B	0.195247	9.49963	1.89881	0.0700529	0.719323	-4.28421
TMCO6	-0.144175	9.02418	-1.8987	0.0700679	0.719323	-4.28438
SPINT2	0.169248	12.9001	1.89852	0.0700926	0.719323	-4.28466
APOA1	0.234853	8.51664	1.89812	0.0701474	0.719323	-4.28529
ZSCAN16	0.181555	9.39101	1.89798	0.0701664	0.719323	-4.2855
TOMM34	-0.148635	13.2608	-1.89768	0.0702086	0.719323	-4.28598
ARMC7	0.149005	9.15477	1.89743	0.0702425	0.719323	-4.28637
TXNRD1	-0.149014	11.4781	-1.89723	0.07027	0.719323	-4.28668
CHMP3	-0.143928	9.83888	-1.89721	0.0702728	0.719323	-4.28671
KLHL5	0.139423	8.15167	1.89721	0.0702734	0.719323	-4.28672
FAM53A	0.179148	8.52666	1.89717	0.0702781	0.719323	-4.28677
CALM1	-0.127479	13.1076	-1.89616	0.0704178	0.720185	-4.28836
SMEK1	-0.155181	8.45883	-1.89531	0.0705347	0.720811	-4.28969
CARD11	0.208643	8.88898	1.89384	0.0707388	0.721537	-4.292
PRAMEF7	-0.158309	7.85942	-1.89334	0.0708082	0.721537	-4.29278
SNORD25	0.170012	8.29254	1.89271	0.0708959	0.721537	-4.29377
STXBP1	-0.168543	9.29066	-1.89225	0.0709596	0.721537	-4.29449
MED25	-0.162938	10.0103	-1.89164	0.0710443	0.721537	-4.29544
SIRT4	0.136504	8.30478	1.89129	0.0710924	0.721537	-4.29598
PYCARD	0.217616	9.06708	1.89114	0.071113	0.721537	-4.29621
HIST1H2AG	0.134691	7.95461	1.89107	0.0711238	0.721537	-4.29633
TERF1	0.152004	8.57526	1.89097	0.0711373	0.721537	-4.29648
TOP1MT	-0.200621	8.78339	-1.89079	0.0711625	0.721537	-4.29677
TNFSF12	-0.111995	10.2952	-1.89001	0.0712718	0.722034	-4.29799
SKAP2	-0.328128	9.48424	-1.88906	0.0714045	0.722034	-4.29948
TMEM87A	0.133259	12.3735	1.88893	0.0714224	0.722034	-4.29968
BRPF3	-0.154732	11.4483	-1.88884	0.0714345	0.722034	-4.29981
EIF2S3	-0.172238	11.5956	-1.88806	0.0715438	0.722547	-4.30104
TRPC5	0.133368	7.72922	1.8875	0.0716217	0.722547	-4.3019
CSPP1	0.77656	9.08333	1.88695	0.0716998	0.722547	-4.30277
FLOT2	0.146182	12.0467	1.88576	0.071867	0.722547	-4.30463
DENND1A	0.120189	8.11826	1.88569	0.0718761	0.722547	-4.30473
RAB27B	0.257361	9.95503	1.88558	0.0718918	0.722547	-4.30491
CCL20	0.165319	7.85241	1.88507	0.0719639	0.722547	-4.30571
PGK2	-0.34701	8.49562	-1.88498	0.0719754	0.722547	-4.30584
SNORA24	0.23377	9.44687	1.8849	0.0719871	0.722547	-4.30597
C2CD5	-0.143983	10.8126	-1.88356	0.072176	0.723333	-4.30806
TMEM42	0.154895	10.8755	1.88355	0.072177	0.723333	-4.30807
DAZAP1	-0.185846	11.0008	-1.88286	0.0722749	0.723703	-4.30915
SART3	-0.183812	8.68832	-1.88198	0.0723994	0.723703	-4.31052
BCL6	0.154215	10.4465	1.88186	0.0724169	0.723703	-4.31072
TSHZ1	-0.19845	9.23334	-1.8816	0.0724533	0.723703	-4.31112
RAN	-0.124361	13.423	-1.88132	0.0724932	0.723703	-4.31156
SNORA26	0.185534	8.01211	1.88087	0.0725561	0.723773	-4.31225
APOF	0.157265	7.89709	1.87952	0.0727473	0.724413	-4.31435
APMAP	-0.102394	11.5225	-1.8795	0.0727501	0.724413	-4.31438
ERI1	-0.476162	7.79468	-1.87874	0.0728583	0.724413	-4.31556
LRFN3	-0.1295	10.6269	-1.87867	0.0728687	0.724413	-4.31568
GBGT1	0.137232	7.82014	1.87785	0.0729856	0.724413	-4.31696
SERTM1	0.118089	7.91055	1.87777	0.0729971	0.724413	-4.31708
PLD1	0.177595	9.07371	1.87737	0.0730544	0.724413	-4.31771
HIST1H3E	0.121975	7.77387	1.87711	0.0730916	0.724413	-4.31811
MRPL22	0.141608	12.1976	1.87688	0.0731234	0.724413	-4.31846
HNRNPA1	-0.24273	9.4477	-1.87633	0.0732018	0.724636	-4.31931
DIP2C	-0.223053	8.64522	-1.87547	0.0733251	0.725303	-4.32066
PPOX	0.208764	10.1761	1.87344	0.0736157	0.727599	-4.32381
RAB9BP1	-0.154026	7.61116	-1.87307	0.0736696	0.727599	-4.32439
FERMT1	-0.217833	9.8799	-1.87048	0.074042	0.730721	-4.32841
PGRMC1	-0.157643	12.4288	-1.86923	0.0742223	0.73147	-4.33035
FDPSP2	-0.106899	7.80419	-1.86908	0.0742444	0.73147	-4.33058
FADS2	-0.262744	9.14409	-1.86874	0.0742932	0.73147	-4.33111
SENP3	0.16807	7.94973	1.86757	0.0744622	0.73147	-4.33292
CEP63	0.137922	10.5629	1.8668	0.0745748	0.73147	-4.33412
POLR2D	-0.184016	9.95948	-1.8659	0.0747055	0.73147	-4.33551
KNOP1	-0.152218	9.13469	-1.86579	0.0747209	0.73147	-4.33568
TAF10	-0.12009	11.7392	-1.86559	0.0747506	0.73147	-4.336
STK16	-0.693488	9.44168	-1.86559	0.0747509	0.73147	-4.336
PTMS	-0.210682	11.1718	-1.86531	0.0747906	0.73147	-4.33642
TNKS2	0.292838	7.65135	1.865	0.0748367	0.73147	-4.33691
P2RX4	0.160512	8.99344	1.86461	0.0748923	0.73147	-4.3375
TACO1	0.193694	11.1706	1.86451	0.0749078	0.73147	-4.33767
XRCC3	-0.223801	9.43751	-1.8645	0.0749082	0.73147	-4.33767
TMEM127	0.193817	9.1225	1.86275	0.0751637	0.732324	-4.34038
PAQR8	0.180135	8.93975	1.86275	0.0751649	0.732324	-4.3404
LOC100507521	0.10906	7.87652	1.86234	0.0752244	0.732324	-4.34102
BOLA2	-0.285276	9.66506	-1.8622	0.075245	0.732324	-4.34124
ARPC2	-0.15672	8.24871	-1.86197	0.0752782	0.732324	-4.34159
SRSF8	-0.158554	11.7483	-1.86081	0.0754485	0.732925	-4.34339
CDC42SE1	0.158067	8.89015	1.86078	0.0754531	0.732925	-4.34344
HNRNPA0	-0.210703	12.107	-1.85958	0.075629	0.733967	-4.34529
SLC35F3	0.10751	7.89903	1.85927	0.0756737	0.733967	-4.34576
HNRNPDL	-0.732806	11.0731	-1.85874	0.0757529	0.734002	-4.3466
STX6	0.115767	10.5123	1.85802	0.0758588	0.734002	-4.34771
TCN2	0.200442	8.3353	1.85793	0.0758709	0.734002	-4.34783
NSMCE1	-0.195506	10.6256	-1.85771	0.0759039	0.734002	-4.34818
PHF23	0.179442	10.8368	1.85685	0.0760306	0.734679	-4.34951
CLEC3B	0.150478	7.62167	1.85617	0.076131	0.735101	-4.35055
CD163L1	0.173805	11.3093	1.85502	0.0763021	0.735381	-4.35234
SYNC	0.190638	8.21003	1.85486	0.0763243	0.735381	-4.35257
TRAF1	0.163695	8.95413	1.85482	0.0763303	0.735381	-4.35263
PDC	-0.113286	7.71536	-1.85386	0.0764735	0.736214	-4.35412
CSDE1	-0.166754	9.02278	-1.8532	0.076571	0.736385	-4.35514
FERMT3	0.158314	8.30201	1.85285	0.076623	0.736385	-4.35568
DHX37	-0.145474	8.06313	-1.85259	0.0766618	0.736385	-4.35608
FOXO4	-0.228734	10.2042	-1.85158	0.0768128	0.737289	-4.35764
NT5C3B	0.148813	10.3895	1.85055	0.0769658	0.738116	-4.35922
FAM45A	0.144583	10.6503	1.84991	0.0770617	0.738116	-4.36021
UBALD1	-0.195715	9.69709	-1.84985	0.0770698	0.738116	-4.3603
SCNN1A	0.236867	7.90078	1.84773	0.0773877	0.738508	-4.36357
ARHGAP18	-0.254909	8.95531	-1.84606	0.0776378	0.738508	-4.36613
PIF1	-0.138204	8.80416	-1.84579	0.0776781	0.738508	-4.36654
RABGEF1	0.158824	9.30625	1.84563	0.0777023	0.738508	-4.36679
AKR7A2	-0.150465	12.2015	-1.84562	0.0777036	0.738508	-4.3668
AGAP1	-0.12842	10.7237	-1.84473	0.0778388	0.738508	-4.36818
BCDIN3D	0.147139	8.57356	1.84465	0.0778507	0.738508	-4.3683
JARID2-AS1	0.166868	7.62727	1.84415	0.0779258	0.738508	-4.36907
CCDC24	0.147626	9.9118	1.84409	0.0779352	0.738508	-4.36916
DGCR11	-0.133013	8.76475	-1.84395	0.0779558	0.738508	-4.36937
EMC9	0.203525	9.83712	1.84392	0.0779602	0.738508	-4.36942
RBM26	-0.206307	9.87803	-1.84344	0.0780323	0.738508	-4.37015
SIGLEC5	-0.159475	7.76805	-1.84193	0.0782602	0.738508	-4.37247
JRKL	-0.235379	8.8329	-1.84151	0.0783241	0.738508	-4.37312
G3BP1	-0.397784	11.1118	-1.84109	0.0783878	0.738508	-4.37376
BMS1	0.166534	11.8186	1.84058	0.0784648	0.738508	-4.37454
DUSP14	0.134587	11.661	1.84045	0.0784854	0.738508	-4.37475
RPL12P1	0.158398	8.32416	1.83976	0.0785901	0.738508	-4.37581
RMRP	0.176537	8.03182	1.8396	0.0786138	0.738508	-4.37604
GPKOW	0.215121	9.63393	1.83913	0.0786859	0.738508	-4.37677
MIR448	-0.12503	7.87354	-1.83908	0.0786933	0.738508	-4.37685
MCM4	-0.395251	11.776	-1.83884	0.0787292	0.738508	-4.37721
CTSO	0.265527	8.87155	1.83881	0.078735	0.738508	-4.37727
SNORD48	0.184509	8.42044	1.83846	0.0787871	0.738508	-4.37779
SERTAD3	0.162777	8.33945	1.83843	0.0787917	0.738508	-4.37784
TTI1	-0.157272	9.53315	-1.83778	0.0788915	0.738508	-4.37884
CHST11	0.146532	7.72016	1.83736	0.0789547	0.738508	-4.37948
PIK3C3	-0.210599	9.50646	-1.83621	0.0791313	0.738508	-4.38125
LAD1	-0.113663	7.6748	-1.836	0.0791634	0.738508	-4.38157
HAT1	-0.231558	9.2711	-1.83597	0.079167	0.738508	-4.38161
CORO2B	-0.161625	8.54922	-1.83589	0.0791803	0.738508	-4.38174
SYNM	0.167874	10.1959	1.83552	0.0792368	0.738508	-4.38231
FAM65A	0.178205	11.2821	1.8355	0.0792395	0.738508	-4.38233
C4orf27	-0.178247	10.207	-1.83495	0.0793233	0.738508	-4.38317
HIST1H3B	0.235393	8.12266	1.83494	0.0793254	0.738508	-4.38319
LOC148413	-0.134348	10.4354	-1.83471	0.0793607	0.738508	-4.38354
TMEM237	-0.117665	10.9548	-1.83462	0.0793741	0.738508	-4.38368
DYRK2	0.113255	9.30163	1.83407	0.0794581	0.738508	-4.38452
MPHOSPH6	-0.218791	9.57621	-1.83356	0.0795364	0.738508	-4.3853
CDK18	-0.147136	7.69345	-1.83324	0.0795865	0.738508	-4.3858
FOXO6	-0.197163	8.06181	-1.83312	0.0796049	0.738508	-4.38598
CKAP5	-0.195621	9.27475	-1.83261	0.0796819	0.738508	-4.38675
CRY2	0.156249	9.10155	1.83215	0.0797541	0.738508	-4.38746
DSEL	0.203823	7.88245	1.83156	0.0798444	0.738508	-4.38836
EOGT	-0.181464	9.14001	-1.8313	0.0798848	0.738508	-4.38876
CCNA1	-0.215475	9.51954	-1.83129	0.0798863	0.738508	-4.38878
KCNS3	-0.430856	8.98094	-1.83128	0.0798877	0.738508	-4.38879
ANAPC4	0.14125	10.8306	1.8308	0.079962	0.738508	-4.38953
C6orf141	-0.210506	10.8047	-1.83039	0.0800252	0.738508	-4.39015
SNRNP200	0.189685	9.12325	1.83016	0.0800601	0.738508	-4.3905
STAT3	0.629205	10.296	1.82977	0.0801204	0.738508	-4.3911
SNHG6	0.137167	12.7476	1.8297	0.0801316	0.738508	-4.39121
HEATR1	-0.147368	10.4439	-1.82947	0.0801673	0.738508	-4.39156
NES	-0.301973	9.60654	-1.82904	0.0802328	0.738508	-4.39221
PLAC1	0.105082	8.18976	1.82863	0.0802962	0.738508	-4.39283
ZNF134	-0.10779	8.8462	-1.82859	0.0803024	0.738508	-4.39289
KIF23	-0.160028	8.524	-1.82805	0.080387	0.738762	-4.39373
CDCA7	-0.167638	11.3386	-1.82743	0.0804821	0.739112	-4.39466
RPL37A	0.187441	8.60602	1.82639	0.0806445	0.739328	-4.39626
NPC1	-0.158203	11.6999	-1.82597	0.0807089	0.739328	-4.39689
NRROS	-0.250345	9.65271	-1.82549	0.0807834	0.739328	-4.39762
GIT2	-0.336996	9.63203	-1.82537	0.0808021	0.739328	-4.39781
SRRT	-0.16918	12.4382	-1.82526	0.0808195	0.739328	-4.39798
TMCC1	-0.152602	7.70657	-1.82508	0.0808479	0.739328	-4.39826
HOOK3	0.130397	8.46641	1.8242	0.0809839	0.739645	-4.39959
UROD	0.10282	12.7295	1.82363	0.0810728	0.739645	-4.40045
MAPK10	0.125596	7.61388	1.82306	0.0811627	0.739645	-4.40133
DHRS7B	0.158405	10.301	1.82267	0.0812231	0.739645	-4.40192
LINC00575	0.134808	7.73711	1.82194	0.0813384	0.739645	-4.40304
C9orf40	-0.188488	10.6685	-1.82193	0.0813396	0.739645	-4.40306
THEM6	-0.156671	11.3899	-1.82163	0.0813857	0.739645	-4.4035
FAN1	-0.176951	8.87261	-1.82149	0.0814086	0.739645	-4.40373
MAPRE1	-0.128106	13.3298	-1.8213	0.0814381	0.739645	-4.40401
UBR5	-0.134372	10.4364	-1.8212	0.0814534	0.739645	-4.40416
RNY4	0.31974	8.58419	1.82039	0.0815801	0.740277	-4.40539
MT2A	-0.160452	14.7387	-1.81962	0.081701	0.740855	-4.40656
APPBP2	-0.109702	8.18076	-1.81922	0.081764	0.740908	-4.40717
PCDH17	0.129946	7.82522	1.81622	0.0822377	0.74312	-4.41174
BCL2L13	0.113854	11.0045	1.81579	0.0823053	0.74312	-4.41239
FMO3	0.150715	7.72379	1.81558	0.0823383	0.74312	-4.41271
MID2	0.158804	8.70329	1.81538	0.0823698	0.74312	-4.41301
FGF13	-0.221507	7.58677	-1.81527	0.0823869	0.74312	-4.41318
VPS26B	-0.188569	9.73113	-1.81492	0.0824427	0.74312	-4.41371
ICAM1	0.238086	8.43943	1.81418	0.0825594	0.74312	-4.41483
COL11A2	0.150954	7.74095	1.81401	0.082587	0.74312	-4.41509
USP53	-0.16913	8.29795	-1.81375	0.0826288	0.74312	-4.41549
ZFP90	0.173306	10.3831	1.81349	0.0826686	0.74312	-4.41588
DDIT3	0.23184	9.87735	1.8131	0.0827319	0.74312	-4.41648
FAM89A	-0.479999	9.40291	-1.81262	0.0828078	0.74312	-4.4172
CREB3	0.243234	8.49235	1.81241	0.0828408	0.74312	-4.41752
GRIPAP1	-0.472784	9.35902	-1.81228	0.0828619	0.74312	-4.41772
MAP3K1	0.177866	10.1014	1.81216	0.0828807	0.74312	-4.4179
SMG1	-0.199739	10.6578	-1.81124	0.0830275	0.74312	-4.4193
SGSH	0.24668	10.5954	1.81119	0.0830356	0.74312	-4.41938
PTGS2	-0.443678	9.51208	-1.81105	0.0830578	0.74312	-4.41959
ELK3	-0.196547	9.57823	-1.81045	0.0831534	0.74312	-4.4205
SETD8	-0.127359	10.2821	-1.81044	0.0831551	0.74312	-4.42051
RHOB	0.20927	10.3693	1.81005	0.0832175	0.743165	-4.42111
MCM8	-0.976261	9.86239	-1.80924	0.0833456	0.743626	-4.42232
SMAGP	0.683501	8.0659	1.809	0.0833839	0.743626	-4.42268
TLR5	0.279944	8.83597	1.80851	0.0834629	0.743819	-4.42343
MFSD12	-0.289046	9.62292	-1.80758	0.0836122	0.743988	-4.42484
KREMEN2	0.128845	7.83767	1.80741	0.0836395	0.743988	-4.4251
ITSN1	-0.179846	7.80502	-1.80717	0.0836775	0.743988	-4.42546
GSTM1	0.189504	8.69498	1.80692	0.083718	0.743988	-4.42584
SYT15	0.15931	9.60839	1.80655	0.0837772	0.743988	-4.4264
CAMKMT	-0.124593	9.37609	-1.8062	0.0838338	0.743988	-4.42693
HIST1H1C	0.258999	12.4385	1.80589	0.0838839	0.743988	-4.42741
CROCCP3	-0.149861	8.04142	-1.80449	0.0841083	0.745068	-4.42951
IL15	0.156282	8.84678	1.80441	0.0841206	0.745068	-4.42963
CELF1	-0.291884	10.0273	-1.80337	0.0842882	0.746043	-4.4312
PNKD	0.145914	8.79077	1.80223	0.0844735	0.746609	-4.43293
TBXAS1	-0.222711	8.5703	-1.8022	0.0844787	0.746609	-4.43298
NFXL1	0.172531	9.70686	1.80153	0.084586	0.746609	-4.43399
HIST1H2BJ	0.211691	8.58037	1.80135	0.0846155	0.746609	-4.43426
ACBD6	0.145501	9.90807	1.80109	0.0846574	0.746609	-4.43465
B4GALT6	-0.188404	8.80704	-1.80084	0.0846978	0.746609	-4.43503
DSC2	0.164289	8.43458	1.80033	0.0847816	0.746839	-4.43581
RAB38	-0.135905	11.3146	-1.79982	0.0848639	0.747056	-4.43657
MRPL48	-0.25189	10.5985	-1.79921	0.0849634	0.747424	-4.4375
ZDHHC12	-0.126198	9.90042	-1.79863	0.0850571	0.747737	-4.43837
TST	0.143257	11.7769	1.79828	0.0851143	0.747737	-4.4389
ZNF512	-0.164676	11.2774	-1.79614	0.0854633	0.748078	-4.44213
WDR1	-0.23835	9.02524	-1.79592	0.0854989	0.748078	-4.44245
METTL10	-0.127283	8.39176	-1.79592	0.0854993	0.748078	-4.44246
ATOH7	0.136891	7.6941	1.79582	0.0855144	0.748078	-4.4426
PNN	-0.141416	11.5569	-1.79487	0.0856696	0.748078	-4.44403
CLCN3	-0.142357	10.4466	-1.79457	0.0857193	0.748078	-4.44448
NUCB2	0.178874	10.3765	1.79451	0.0857296	0.748078	-4.44458
LYPD6	-0.156036	8.48188	-1.79448	0.0857342	0.748078	-4.44462
HNRNPAB	-0.110137	13.8119	-1.79434	0.0857566	0.748078	-4.44483
SAC3D1	0.158648	11.2019	1.79426	0.0857696	0.748078	-4.44495
AHCTF1	0.159158	10.0303	1.79415	0.0857882	0.748078	-4.44512
LINC00704	-0.166142	11.7203	-1.79358	0.0858811	0.748384	-4.44597
DNAJA2	0.132401	12.0613	1.79281	0.0860082	0.748564	-4.44714
DMTF1	-0.383013	10.4143	-1.79251	0.0860575	0.748564	-4.44759
ANXA5	-0.102608	13.5298	-1.79236	0.0860819	0.748564	-4.44781
EFHD1	0.214002	9.45767	1.79205	0.0861328	0.748564	-4.44828
FAM84B	-0.177156	11.0511	-1.79122	0.0862695	0.748816	-4.44953
EIF3K	0.111974	12.851	1.79103	0.0863012	0.748816	-4.44982
GDI1	-0.158584	10.8407	-1.79082	0.0863351	0.748816	-4.45013
FNDC4	0.158844	8.92703	1.78866	0.0866922	0.750864	-4.45338
RCN1	0.110519	12.7299	1.78822	0.0867639	0.750864	-4.45403
TBC1D10A	0.153356	8.74395	1.78741	0.086899	0.750864	-4.45525
PNMA1	-0.151075	10.6182	-1.78734	0.0869102	0.750864	-4.45536
OAS1	0.33621	8.63498	1.78718	0.0869374	0.750864	-4.4556
ITM2C	0.163708	10.6574	1.78689	0.0869856	0.750864	-4.45604
AUNIP	0.154871	8.9148	1.78663	0.0870288	0.750864	-4.45643
CNNM4	-0.137329	8.07344	-1.78659	0.0870349	0.750864	-4.45648
CCNB1IP1	0.156744	11.4542	1.78572	0.087179	0.750993	-4.45779
RPS6KA1	0.240088	8.98788	1.78557	0.0872048	0.750993	-4.45802
ADGRG2	0.113096	7.78763	1.78538	0.0872349	0.750993	-4.45829
NEFM	0.198061	7.58147	1.7851	0.0872816	0.750993	-4.45871
VANGL1	0.129971	7.82417	1.78416	0.0874393	0.75143	-4.46013
PKN1	-0.196411	7.87821	-1.78384	0.0874912	0.75143	-4.4606
PRKAR2A	0.200694	9.33256	1.78375	0.0875064	0.75143	-4.46074
MAGEH1	0.166388	9.23662	1.78299	0.0876333	0.751452	-4.46188
RSU1	-0.114499	10.1274	-1.78293	0.087644	0.751452	-4.46197
RAB11B	-0.191237	8.53405	-1.78197	0.0878032	0.751452	-4.4634
DUSP1	0.295934	12.1649	1.7814	0.0878992	0.751452	-4.46426
MOGS	0.192714	9.76809	1.78131	0.087914	0.751452	-4.4644
MBTPS1	0.40726	9.84344	1.78109	0.087951	0.751452	-4.46473
CCBL2	-0.508625	9.50268	-1.78097	0.087972	0.751452	-4.46491
PFDN5	0.154285	13.43	1.78096	0.0879729	0.751452	-4.46492
PMS2P5	-0.268265	9.62706	-1.78034	0.0880766	0.751842	-4.46585
SPRED2	-0.125599	9.64454	-1.77991	0.0881487	0.751962	-4.46649
TARS2	0.209511	9.13341	1.7786	0.0883691	0.753347	-4.46846
EIF4B	-0.120544	12.7581	-1.77756	0.0885444	0.754041	-4.47002
STX18	0.139027	7.91692	1.77742	0.088567	0.754041	-4.47022
CLDN23	0.148125	8.49965	1.77655	0.0887133	0.754466	-4.47152
CCNO	0.147229	7.87237	1.77644	0.0887333	0.754466	-4.47169
RBMX	-0.128134	11.5601	-1.77579	0.0888419	0.754894	-4.47265
SNORD89	0.141796	8.87437	1.77525	0.0889329	0.755172	-4.47346
DYX1C1	0.150984	7.80608	1.77442	0.0890734	0.755724	-4.4747
OR4C45	-0.114075	7.82114	-1.77403	0.0891406	0.755724	-4.47529
BEGAIN	0.14661	8.2439	1.77384	0.0891728	0.755724	-4.47558
ZIC2	-0.212437	10.3992	-1.77345	0.0892378	0.75578	-4.47615
THRAP3	-0.155907	9.71428	-1.77304	0.0893078	0.7558	-4.47677
POMT2	-0.178422	10.7704	-1.77264	0.089376	0.7558	-4.47737
CSNK2A1	-0.193736	8.42113	-1.77241	0.0894151	0.7558	-4.47771
AP1G2	0.173562	10.5895	1.77168	0.0895385	0.756349	-4.47879
SLC27A1	-0.192294	10.4602	-1.77066	0.0897129	0.757329	-4.48032
TMEM179B	0.122545	12.7444	1.77001	0.0898234	0.757357	-4.48129
PLCL2	0.187217	8.98582	1.76995	0.0898331	0.757357	-4.48137
MUTYH	0.669886	8.29555	1.76925	0.0899527	0.757376	-4.48242
LOC401010	-0.170538	7.81372	-1.76896	0.0900028	0.757376	-4.48286
MAP3K10	-0.124167	8.59269	-1.76891	0.0900107	0.757376	-4.48292
MYH16	-0.227361	8.70213	-1.76835	0.0901059	0.757621	-4.48376
DDX59	0.371928	9.56974	1.76799	0.0901679	0.757621	-4.4843
BRCA1	-0.128349	8.98281	-1.76771	0.0902152	0.757621	-4.48471
NIPAL1	0.197017	8.3321	1.76613	0.090486	0.759021	-4.48706
ADGRF5	0.245594	11.6342	1.76606	0.0904992	0.759021	-4.48717
GLI3	-0.15736	8.81383	-1.76535	0.0906201	0.759399	-4.48822
ADAMTS9	0.163659	7.75507	1.76511	0.0906614	0.759399	-4.48858
PCM1	-0.128238	10.9791	-1.76471	0.0907306	0.759487	-4.48918
FBXO4	-0.174743	8.76768	-1.7629	0.0910426	0.760205	-4.49187
IDH3G	-0.172446	10.5657	-1.76246	0.091118	0.760205	-4.49252
LRP11	-0.201505	10.2445	-1.76239	0.0911302	0.760205	-4.49263
PARP1	-0.116651	12.2964	-1.76223	0.0911582	0.760205	-4.49287
LPIN2	-0.146432	7.87139	-1.76204	0.0911898	0.760205	-4.49314
TCF25	0.143289	11.6768	1.76185	0.0912226	0.760205	-4.49342
CCDC61	-0.11019	7.84884	-1.76183	0.0912269	0.760205	-4.49346
ZNF177	0.121642	9.12441	1.76098	0.0913732	0.760667	-4.49472
KCND1	-0.17649	8.04164	-1.76083	0.0913998	0.760667	-4.49495
PCGF3	-0.167567	7.77446	-1.76022	0.0915042	0.761047	-4.49584
UVSSA	0.179993	9.80517	1.75953	0.0916249	0.761562	-4.49688
LENG8	-0.188119	8.68147	-1.75844	0.0918143	0.762616	-4.49849
NAGLU	0.194537	10.0264	1.75812	0.0918693	0.762616	-4.49897
PDLIM4	0.130669	7.79585	1.75745	0.091986	0.76262	-4.49996
TUBGCP4	-0.139403	9.50688	-1.75644	0.0921611	0.76262	-4.50145
AMDHD1	0.129497	8.13173	1.756	0.0922384	0.76262	-4.50211
VLDLR	-0.172032	9.03738	-1.75565	0.0922989	0.76262	-4.50262
TTL	-0.153508	11.1888	-1.75556	0.0923145	0.76262	-4.50276
ARRB1	0.173752	9.63537	1.75516	0.092384	0.76262	-4.50335
LINC01341	0.158266	7.78707	1.7549	0.0924302	0.76262	-4.50374
RNF44	-0.195567	9.98711	-1.75479	0.0924492	0.76262	-4.5039
C14orf2	0.198628	10.662	1.75476	0.092454	0.76262	-4.50394
MKI67	-0.160431	8.81446	-1.75427	0.0925397	0.76262	-4.50466
PROM2	0.120677	7.86177	1.75425	0.092544	0.76262	-4.5047
COMMD9	0.149032	10.3505	1.75407	0.0925761	0.76262	-4.50497
TIMM21	-0.13073	11.6615	-1.7537	0.0926395	0.762657	-4.50551
KRTCAP2	0.1992	12.5013	1.75318	0.0927308	0.762924	-4.50628
MAP1S	-0.141267	10.9809	-1.75281	0.0927963	0.762979	-4.50683
POLG	-0.149122	10.1201	-1.7517	0.0929915	0.763773	-4.50848
NFKBIZ	0.152866	7.79464	1.75099	0.0931146	0.763773	-4.50952
RYR2	0.132313	7.77557	1.75094	0.0931248	0.763773	-4.5096
FOXK1	-0.214435	10.6312	-1.75014	0.0932653	0.763773	-4.51078
PARP16	-0.119417	8.07899	-1.7499	0.0933078	0.763773	-4.51114
TBC1D4	0.131322	9.4318	1.74954	0.0933703	0.763773	-4.51166
TECR	-0.145572	13.0888	-1.74946	0.0933841	0.763773	-4.51178
RPH3AL	-0.1833	9.37423	-1.74932	0.0934098	0.763773	-4.512
VENTXP1	0.116515	8.07822	1.74924	0.0934234	0.763773	-4.51211
TMEM218	-0.111434	7.86777	-1.74787	0.0936649	0.765047	-4.51413
TRDMT1	-0.125418	8.30112	-1.74746	0.0937378	0.765047	-4.51474
MPP3	-0.134922	8.11089	-1.74735	0.0937563	0.765047	-4.5149
SMN2	0.230588	8.03118	1.74674	0.0938645	0.765396	-4.5158
SNORD55	0.180402	8.39271	1.74578	0.0940346	0.765396	-4.51721
ERP29	-0.104283	13.6498	-1.74509	0.094158	0.765396	-4.51824
CDC42	-0.175487	9.08893	-1.74505	0.0941653	0.765396	-4.5183
GORASP1	-0.117303	10.1941	-1.74398	0.094354	0.765396	-4.51987
LSM6	-0.20336	8.86799	-1.74344	0.0944512	0.765396	-4.52067
B2M	0.168032	14.4897	1.74335	0.0944675	0.765396	-4.52081
BOK	-0.118857	9.49754	-1.74323	0.0944882	0.765396	-4.52098
MOAP1	0.111384	10.7363	1.74288	0.0945511	0.765396	-4.5215
PPP1R35	-0.119901	10.5998	-1.74269	0.0945846	0.765396	-4.52178
UBE2E2	0.138211	11.5152	1.7425	0.0946189	0.765396	-4.52206
SBK1	0.13965	7.83925	1.74214	0.0946816	0.765396	-4.52258
ZMYND8	-0.133678	7.78824	-1.74184	0.0947351	0.765396	-4.52302
MINA	-0.122506	8.96285	-1.74169	0.0947619	0.765396	-4.52324
SMARCAD1	-0.182619	9.57553	-1.74069	0.0949418	0.765396	-4.52473
CFH	0.163509	8.7573	1.7405	0.0949743	0.765396	-4.52499
ZFYVE1	0.157389	9.17833	1.74039	0.0949939	0.765396	-4.52516
ADORA2B	0.131063	11.6695	1.74035	0.0950015	0.765396	-4.52522
SCIMP	-0.0995211	7.87711	-1.74008	0.0950507	0.765396	-4.52562
LINC01300	0.142866	8.08155	1.73936	0.0951798	0.765396	-4.52669
LOC100507599	0.124449	8.49523	1.73863	0.0953102	0.765396	-4.52776
RHBDD1	-0.137893	8.91382	-1.73755	0.0955033	0.765396	-4.52934
ANAPC7	-0.192684	9.65474	-1.73703	0.0955978	0.765396	-4.53011
E2F6	0.110021	10.2056	1.73697	0.0956076	0.765396	-4.53019
GFRA1	-0.131872	7.78908	-1.73672	0.0956522	0.765396	-4.53056
TMEM115	0.149863	10.4182	1.73663	0.0956689	0.765396	-4.53069
ARV1	0.148871	9.65932	1.73646	0.0956996	0.765396	-4.53094
CSNK1A1	0.418212	9.52539	1.73588	0.0958035	0.765396	-4.53179
SALL2	-0.164011	8.98542	-1.73559	0.0958567	0.765396	-4.53222
AGR2	-0.4715	8.23206	-1.73552	0.0958683	0.765396	-4.53232
PDSS1	0.249139	9.58855	1.73539	0.0958932	0.765396	-4.53252
MRPL55	-0.65265	9.30036	-1.73509	0.0959462	0.765396	-4.53295
RANBP6	-0.159151	9.5118	-1.73487	0.0959857	0.765396	-4.53328
DNAJB5	0.149776	8.74308	1.73473	0.0960115	0.765396	-4.53349
SNX8	0.373721	9.58996	1.73453	0.0960482	0.765396	-4.53378
ACOT13	0.178264	10.6209	1.73452	0.0960488	0.765396	-4.53379
KCNJ10	-0.135154	8.25338	-1.73447	0.0960592	0.765396	-4.53387
STAP2	0.191915	9.11222	1.73389	0.0961635	0.765396	-4.53472
SOX4	0.199165	11.1721	1.73339	0.0962529	0.765396	-4.53545
DYNC1H1	-0.122604	12.7728	-1.73333	0.0962639	0.765396	-4.53554
TOMM7	0.111162	13.8858	1.73315	0.0962973	0.765396	-4.53581
GADD45A	0.272697	10.7224	1.73293	0.0963363	0.765396	-4.53612
FOXRED1	0.12737	11.2192	1.73292	0.096339	0.765396	-4.53615
ELL2	-0.209963	10.596	-1.73217	0.0964737	0.765996	-4.53724
SLC7A7	0.124223	8.41344	1.73026	0.0968208	0.766468	-4.54004
CENPI	-0.171812	8.63146	-1.73019	0.0968337	0.766468	-4.54015
LMNB2	-0.172547	12.5224	-1.73015	0.0968402	0.766468	-4.5402
TEFM	0.129854	10.289	1.72967	0.0969287	0.766468	-4.54091
USP6NL	-0.176262	9.25584	-1.72949	0.0969602	0.766468	-4.54116
PTGFR	0.112696	8.0194	1.72936	0.0969844	0.766468	-4.54136
UNC5B	-0.145581	7.70198	-1.72898	0.0970546	0.766468	-4.54192
PPP2R3A	-0.133105	8.52302	-1.72885	0.0970782	0.766468	-4.54211
RAMP2	-0.102536	8.01501	-1.72852	0.0971366	0.766468	-4.54258
SNORD62B	-0.133639	7.80991	-1.72819	0.0971983	0.766468	-4.54308
PDE4D	-0.186303	9.4604	-1.72692	0.0974302	0.766468	-4.54494
ALX3	0.101014	7.78021	1.72651	0.0975048	0.766468	-4.54554
SFT2D1	-0.134608	12.7327	-1.72628	0.0975457	0.766468	-4.54586
MAD1L1	0.205623	9.45739	1.72618	0.0975644	0.766468	-4.54601
JUNB	0.203075	10.3526	1.72571	0.0976503	0.766468	-4.5467
RIMS2	0.236834	8.10457	1.72552	0.0976859	0.766468	-4.54698
SLK	-0.232207	10.1228	-1.72547	0.0976949	0.766468	-4.54706
EIF5B	-0.0864933	10.7485	-1.72539	0.0977094	0.766468	-4.54717
ZBTB44	0.144594	9.48732	1.72437	0.0978957	0.766468	-4.54866
ADSS	-0.338773	11.5754	-1.72428	0.0979125	0.766468	-4.54879
GAA	0.293144	9.04714	1.7241	0.0979465	0.766468	-4.54906
ZNF555	0.126821	7.82685	1.72396	0.097971	0.766468	-4.54926
BPGM	-0.18161	9.28719	-1.72363	0.0980324	0.766468	-4.54975
CSF1R	-0.195139	8.49367	-1.7233	0.0980935	0.766468	-4.55023
TGFB2	0.247238	8.37844	1.72319	0.0981136	0.766468	-4.55039
SLC35B1	0.116404	12.3394	1.72318	0.0981142	0.766468	-4.5504
CSHL1	-0.165502	8.42431	-1.7231	0.0981301	0.766468	-4.55052
SLC24A1	-0.160487	8.55311	-1.72236	0.098265	0.767059	-4.55159
HIVEP2	0.139993	8.99487	1.72175	0.0983786	0.767105	-4.5525
TIMELESS	-0.161983	11.0268	-1.72169	0.0983893	0.767105	-4.55258
NANP	-0.123005	8.59646	-1.72123	0.0984729	0.767295	-4.55324
FDXACB1	-0.12396	7.81487	-1.71928	0.0988342	0.769648	-4.5561
ICT1	0.146632	10.828	1.71831	0.0990142	0.770587	-4.55752
APOBEC3G	0.153368	8.31361	1.7179	0.09909	0.770713	-4.55811
SMCP	-0.12898	7.92755	-1.7161	0.0994228	0.771457	-4.56072
SEPN1	-0.141882	9.53392	-1.71608	0.0994273	0.771457	-4.56076
MLX	0.129685	9.74955	1.71596	0.0994498	0.771457	-4.56094
RNF125	0.110991	8.07718	1.71588	0.0994645	0.771457	-4.56105
UBQLN2	-0.173076	11.1897	-1.71578	0.0994833	0.771457	-4.5612
SNORA73A	0.2215	8.69188	1.71418	0.0997808	0.772153	-4.56352
A4GALT	-0.112229	8.30948	-1.71382	0.0998477	0.772153	-4.56405
MAGEA3	0.12697	7.93432	1.71337	0.0999328	0.772153	-4.56471
KTN1	0.508103	9.73473	1.71318	0.0999682	0.772153	-4.56499
DIAPH2	-0.146619	9.33133	-1.71303	0.0999953	0.772153	-4.5652
SERPING1	0.118827	7.70325	1.71288	0.100024	0.772153	-4.56542
SMC4	-0.231603	8.97811	-1.71258	0.100079	0.772153	-4.56585
MAN2B1	0.205284	9.06072	1.71222	0.100147	0.772153	-4.56638
UBE2L3	0.405332	7.87716	1.71202	0.100184	0.772153	-4.56666
FAM122B	-0.207485	10.4336	-1.71193	0.100201	0.772153	-4.56679
MSI2	-0.104442	8.42888	-1.71178	0.100229	0.772153	-4.56701
ZSCAN5A	0.162167	8.13344	1.71088	0.100397	0.772369	-4.56832
SIGLEC12	-0.27751	8.37346	-1.71073	0.100426	0.772369	-4.56854
LY6E	0.260723	11.7341	1.71052	0.100465	0.772369	-4.56884
CARS2	-0.173552	8.71349	-1.71036	0.100495	0.772369	-4.56908
ZSWIM1	0.119843	10.9538	1.70901	0.100749	0.773862	-4.57104
SLC38A6	-0.159652	9.4461	-1.7083	0.100883	0.77442	-4.57208
ATP11B	-0.18802	9.45216	-1.70799	0.100941	0.77442	-4.57252
C4orf46	-0.100058	9.65362	-1.7074	0.101052	0.774813	-4.57338
MDM2	-0.102816	7.81826	-1.70608	0.101301	0.775235	-4.57529
RNF39	0.24733	7.63493	1.70608	0.101301	0.775235	-4.57529
TRIM3	-0.133261	9.30545	-1.70568	0.101377	0.775235	-4.57587
HHAT	0.117179	8.13396	1.70385	0.101722	0.775235	-4.57852
CASC4	-0.744851	9.02301	-1.70337	0.101813	0.775235	-4.57921
LRRC47	-0.0970182	10.6629	-1.70294	0.101896	0.775235	-4.57985
CDPF1	-0.113834	8.37278	-1.7029	0.101903	0.775235	-4.5799
CD52	0.15487	7.74947	1.70278	0.101926	0.775235	-4.58008
KCNIP3	0.147404	8.74991	1.70261	0.101959	0.775235	-4.58033
MLLT6	-0.187581	10.8919	-1.70254	0.101972	0.775235	-4.58043
MRPS18C	0.171026	12.5123	1.70243	0.101992	0.775235	-4.58058
TUBG2	0.179882	10.4624	1.70215	0.102045	0.775235	-4.58098
INPP5K	0.166276	9.17267	1.70188	0.102098	0.775235	-4.58138
AMD1	-0.420258	11.5796	-1.70131	0.102206	0.775235	-4.58221
MICAL2	-0.170068	9.96762	-1.70125	0.102216	0.775235	-4.58228
TMEM175	0.126996	9.8683	1.7009	0.102284	0.775235	-4.5828
CD248	0.147204	7.85572	1.70065	0.10233	0.775235	-4.58315
MEN1	-0.140074	9.50771	-1.70053	0.102354	0.775235	-4.58333
LRP12	0.110431	7.81297	1.70031	0.102396	0.775235	-4.58365
TSPAN12	-0.120855	8.15873	-1.70018	0.10242	0.775235	-4.58383
THOC6	-0.171207	10.1247	-1.70018	0.102421	0.775235	-4.58384
LRP8	-0.376806	9.57102	-1.69994	0.102466	0.775235	-4.58418
IL18BP	0.134833	8.46303	1.69985	0.102483	0.775235	-4.58431
SPC25	-0.238259	9.02275	-1.69936	0.102578	0.775497	-4.58503
MIEF2	0.119788	7.61021	1.69842	0.102756	0.776392	-4.58638
PCDHGA5	-0.202021	7.70606	-1.69763	0.102908	0.777089	-4.58753
NECAP2	0.131178	11.3029	1.6971	0.10301	0.777403	-4.58829
OSTCP1	0.143773	8.85411	1.69626	0.10317	0.778029	-4.5895
GNAQ	-0.178885	8.59847	-1.69559	0.103298	0.778029	-4.59046
SLC25A27	-0.107357	7.83973	-1.69548	0.10332	0.778029	-4.59063
GORASP2	0.126743	11.1855	1.69503	0.103407	0.778029	-4.59128
PUS10	-0.125511	7.74213	-1.69481	0.103448	0.778029	-4.59159
ZNF664	-0.216569	8.70816	-1.69461	0.103486	0.778029	-4.59188
C1orf74	0.166213	9.24669	1.69447	0.103513	0.778029	-4.59208
ATP7B	-0.10867	8.49112	-1.69414	0.103578	0.778062	-4.59256
RNF181	0.158303	12.5777	1.69365	0.103672	0.778318	-4.59327
TTC26	-0.135126	8.89844	-1.69263	0.103868	0.779072	-4.59473
MSN	-0.168955	14.3235	-1.69251	0.103892	0.779072	-4.59492
SNORA71E	0.135078	7.5419	1.69194	0.104002	0.779231	-4.59573
ZNF669	0.147699	8.51605	1.69133	0.10412	0.779231	-4.59661
FARP1	-0.152789	9.74981	-1.69118	0.104147	0.779231	-4.59682
TSEN34	0.0953614	12.655	1.69115	0.104154	0.779231	-4.59687
FAM117B	-0.239649	9.53238	-1.6907	0.104241	0.779432	-4.59752
RTP5	-0.139163	7.75027	-1.69025	0.104329	0.779639	-4.59817
ATAD2B	-0.159965	8.27907	-1.68956	0.104461	0.78018	-4.59915
PRSS2	0.430004	11.6891	1.68783	0.104798	0.781739	-4.60165
GNL3L	-0.116259	7.86082	-1.68749	0.104864	0.781739	-4.60214
CMTM7	-0.168788	9.28714	-1.68623	0.10511	0.781739	-4.60395
TPI1	-0.120705	13.6404	-1.68621	0.105112	0.781739	-4.60397
ANK3	-0.106828	8.66466	-1.68619	0.105117	0.781739	-4.60401
NT5DC3	-0.109045	7.833	-1.68587	0.105179	0.781739	-4.60446
P4HTM	-0.481607	9.48533	-1.68586	0.105181	0.781739	-4.60447
RPL3	-0.0923784	14.7249	-1.68525	0.1053	0.781739	-4.60535
TBX19	0.133472	8.06604	1.68485	0.105378	0.781739	-4.60593
EIF4G2	-0.110767	14.2161	-1.68445	0.105457	0.781739	-4.60651
APOL3	0.192326	9.19084	1.68377	0.105589	0.781739	-4.60748
TMBIM4	-0.108904	12.401	-1.6832	0.105702	0.781739	-4.6083
LMNB1	-0.163172	10.2809	-1.68318	0.105706	0.781739	-4.60834
PEMT	0.162652	8.42963	1.6826	0.105818	0.781739	-4.60916
AP2B1	-0.137351	10.8198	-1.68259	0.10582	0.781739	-4.60917
OCRL	-0.114939	11.0124	-1.6825	0.105838	0.781739	-4.6093
ATP6V1A	-0.126037	11.4639	-1.68232	0.105873	0.781739	-4.60956
TAF15	-0.536087	12.4814	-1.68208	0.10592	0.781739	-4.60991
MMP11	0.166771	8.28506	1.6817	0.105996	0.781739	-4.61046
TYMSOS	0.190094	10.6432	1.6812	0.106092	0.781739	-4.61116
BTG3	-0.704077	10.0933	-1.68072	0.106188	0.781739	-4.61186
PAX9	0.191885	7.60182	1.68066	0.106198	0.781739	-4.61194
FAM46B	-0.122327	8.26169	-1.68046	0.106238	0.781739	-4.61223
ZSCAN12	0.106208	7.94646	1.68043	0.106245	0.781739	-4.61228
EHMT2	-0.130976	8.68624	-1.68033	0.106265	0.781739	-4.61242
KCNQ2	-0.147529	7.87157	-1.67954	0.106421	0.781739	-4.61355
TCTN3	-0.109759	8.99665	-1.67906	0.106514	0.781739	-4.61423
LINC01554	0.112231	7.75075	1.67897	0.106531	0.781739	-4.61436
LAPTM4A	-0.129297	10.6756	-1.67888	0.106549	0.781739	-4.61449
TMEM192	0.140878	9.02088	1.67849	0.106626	0.781739	-4.61505
BUD13	-0.133359	10.8281	-1.67839	0.106646	0.781739	-4.6152
BRF2	0.146535	9.13388	1.67805	0.106713	0.781739	-4.61568
TPX2	-0.139522	12.0305	-1.67787	0.106749	0.781739	-4.61594
TCTA	-0.1393	9.14688	-1.67772	0.106778	0.781739	-4.61615
TIMM23	-0.147377	9.54317	-1.6775	0.106822	0.781739	-4.61647
TCF12	-0.168172	10.2382	-1.6774	0.106842	0.781739	-4.61662
TBL3	-0.201656	8.65679	-1.677	0.106921	0.781877	-4.61719
ST3GAL4	0.133878	9.37199	1.67605	0.107108	0.782799	-4.61854
TMEM241	0.193655	9.52934	1.67551	0.107216	0.78315	-4.61932
PI4KB	0.150834	10.0689	1.67464	0.107388	0.783413	-4.62056
ZNF251	0.193601	8.26948	1.67379	0.107556	0.783413	-4.62177
SDHAF4	0.173569	9.22	1.67377	0.107561	0.783413	-4.62181
GALNT2	-0.152551	8.36501	-1.67369	0.107577	0.783413	-4.62192
AK1	0.155631	9.3148	1.6736	0.107594	0.783413	-4.62204
RPL13P5	0.145245	7.9338	1.6735	0.107615	0.783413	-4.62219
DOCK1	-0.155297	9.328	-1.67286	0.107741	0.783893	-4.6231
RAB24	0.126151	8.523	1.67159	0.107994	0.784247	-4.62491
CYCSP52	-0.37677	10.6344	-1.6712	0.108073	0.784247	-4.62548
TRIM44	-0.108549	11.9062	-1.67098	0.108116	0.784247	-4.62579
RNF150	-0.14226	7.61134	-1.67088	0.108137	0.784247	-4.62593
ARSK	-0.149195	8.70328	-1.67074	0.108165	0.784247	-4.62614
CHTF18	-0.203472	9.934	-1.67071	0.108169	0.784247	-4.62617
MIR345	0.110516	7.89941	1.67032	0.108248	0.784247	-4.62673
HOXC6	0.634774	8.51956	1.66962	0.108387	0.784247	-4.62772
ZNF419	0.133953	10.3206	1.66954	0.108405	0.784247	-4.62785
PSMC3	0.121158	12.402	1.6691	0.108492	0.784247	-4.62847
MIR639	0.166141	7.65448	1.66902	0.108508	0.784247	-4.62859
TMUB2	-0.140102	8.02412	-1.66859	0.108594	0.784247	-4.6292
POLR2J4	-0.515064	9.37101	-1.66818	0.108675	0.784247	-4.62978
PVT1	-0.207203	8.67195	-1.66817	0.108677	0.784247	-4.62979
WDR82	-0.117442	11.5866	-1.66807	0.108698	0.784247	-4.62994
UBTF	-0.143221	9.21038	-1.66735	0.108843	0.784859	-4.63097
GTF2H2B	-0.185904	9.76653	-1.66672	0.10897	0.784921	-4.63187
MANEA	-0.115663	8.21869	-1.6667	0.108973	0.784921	-4.63189
IL13RA1	-0.127798	12.3028	-1.66628	0.109058	0.785096	-4.63249
SNX19	-0.128996	10.2486	-1.66577	0.109161	0.785402	-4.63322
PGRMC2	0.15279	11.9409	1.66531	0.109252	0.785469	-4.63387
DDX18	0.106067	11.7708	1.66507	0.1093	0.785469	-4.63421
MRPL28	0.210401	9.1238	1.66482	0.109352	0.785469	-4.63457
OS9	0.216824	9.28237	1.66318	0.109683	0.787408	-4.63691
TOR4A	-0.147953	10.6689	-1.66234	0.109853	0.787408	-4.6381
AAK1	-0.185382	9.86934	-1.66205	0.109911	0.787408	-4.63851
CTH	-0.198378	8.88558	-1.66176	0.109969	0.787408	-4.63892
PPP1R8	-0.157624	9.45064	-1.66174	0.109973	0.787408	-4.63894
IPO7	-0.223684	10.1794	-1.66153	0.110016	0.787408	-4.63924
RBL2	-0.14925	10.7634	-1.66137	0.110048	0.787408	-4.63947
CHEK2	-0.143165	9.19846	-1.66084	0.110156	0.787752	-4.64023
HOXD1	0.159631	10.542	1.65972	0.110384	0.788358	-4.64183
ORAI1	-0.186293	9.79461	-1.65905	0.110519	0.788358	-4.64277
RPL8	1.82773	11.4911	1.65871	0.110589	0.788358	-4.64325
PERP	-0.202275	10.272	-1.65845	0.110642	0.788358	-4.64362
SKA3	-0.126623	9.98144	-1.65833	0.110666	0.788358	-4.64379
EGLN1	-0.158454	9.09797	-1.65809	0.110714	0.788358	-4.64413
CCDC113	0.140168	7.73906	1.65772	0.11079	0.788358	-4.64466
ZFPM2	0.124948	7.86831	1.65738	0.11086	0.788358	-4.64515
WDR60	0.2214	9.92965	1.65723	0.110889	0.788358	-4.64535
C1orf198	-0.122143	10.465	-1.65716	0.110903	0.788358	-4.64545
SPANXD	0.271511	10.2657	1.65713	0.11091	0.788358	-4.64549
TNFAIP2	0.23309	9.03843	1.65655	0.111028	0.788762	-4.64631
MTERF3	-0.111678	10.9407	-1.65625	0.11109	0.788767	-4.64674
LRRC23	0.138292	7.89108	1.65512	0.111321	0.789729	-4.64835
RAB20	0.102002	8.00093	1.65495	0.111356	0.789729	-4.64859
GUSBP1	-0.23043	9.14915	-1.6546	0.111427	0.789729	-4.64908
PJA1	-0.125615	9.68344	-1.65363	0.111627	0.789729	-4.65046
MKL1	0.114936	8.67959	1.65337	0.11168	0.789729	-4.65083
MYO3B	0.166008	9.47488	1.65294	0.111766	0.789729	-4.65142
LRRC37A4P	-0.117042	8.53626	-1.65294	0.111768	0.789729	-4.65143
MCL1	-0.533761	12.1449	-1.65253	0.111852	0.789729	-4.65201
TNFRSF21	0.194622	12.5098	1.65203	0.111953	0.789729	-4.65271
WDR35	0.324036	8.11555	1.65201	0.111957	0.789729	-4.65274
NEK11	0.149439	8.16849	1.65131	0.112102	0.789729	-4.65373
H2AFX	-0.225914	10.995	-1.65122	0.112121	0.789729	-4.65386
SLC39A1	0.116405	11.7546	1.65079	0.112209	0.789729	-4.65447
LYZ	-0.148595	7.63016	-1.65057	0.112255	0.789729	-4.65479
HNRNPCL2	-0.159807	8.6246	-1.65045	0.112279	0.789729	-4.65495
BBS4	0.179093	8.48942	1.65034	0.112302	0.789729	-4.65511
TRIB1	-0.124106	11.9125	-1.64991	0.112391	0.789729	-4.65572
ACYP1	0.690468	8.34906	1.64988	0.112397	0.789729	-4.65576
KIAA0101	-0.157244	8.42822	-1.64963	0.112447	0.789729	-4.6561
ATXN7L2	0.188003	8.56964	1.64939	0.112497	0.789729	-4.65644
NMU	0.216546	9.60671	1.64898	0.112583	0.789729	-4.65703
OST4	-0.114807	13.4149	-1.64843	0.112695	0.789729	-4.6578
FASTKD2	-0.140394	9.18661	-1.64841	0.1127	0.789729	-4.65783
SPRR2D	-0.122849	7.7173	-1.64804	0.112776	0.789729	-4.65835
EDEM2	0.143348	10.2217	1.64792	0.112802	0.789729	-4.65853
STK38L	-0.144504	8.14316	-1.64706	0.11298	0.789729	-4.65975
HNRNPA1L2	-0.113139	8.64345	-1.64683	0.113027	0.789729	-4.66006
NINJ1	0.198951	9.64731	1.6467	0.113054	0.789729	-4.66025
RPS29	1.14959	9.55014	1.64655	0.113084	0.789729	-4.66046
PSENEN	-0.178331	10.2562	-1.64653	0.113089	0.789729	-4.66048
DPF3	0.12325	8.16066	1.64597	0.113204	0.789729	-4.66127
TRMT10A	-0.145206	8.07012	-1.64589	0.113223	0.789729	-4.6614
IGF2BP1	0.188785	8.59159	1.64562	0.113278	0.789729	-4.66177
SBF1	-0.138567	10.1678	-1.6453	0.113344	0.789729	-4.66222
OVGP1	0.180218	8.43585	1.64523	0.113358	0.789729	-4.66232
FAM74A4	-0.122235	7.91126	-1.64482	0.113443	0.789771	-4.6629
MBTD1	0.232218	9.61703	1.64448	0.113514	0.789771	-4.66337
PRKD3	-0.113909	8.73487	-1.64409	0.113595	0.789771	-4.66392
ZNFX1	0.131864	11.3116	1.64397	0.113621	0.789771	-4.6641
HSD17B3	0.140584	7.80795	1.64374	0.113669	0.789771	-4.66442
CRYL1	0.173227	8.95389	1.64343	0.113733	0.789794	-4.66486
COQ10A	0.128621	9.95812	1.64259	0.113908	0.790342	-4.66604
GADD45B	0.189424	11.2924	1.64244	0.11394	0.790342	-4.66626
C4orf47	0.118463	8.03651	1.64201	0.114029	0.790342	-4.66686
GPX3	0.11645	11.7738	1.64134	0.114169	0.790342	-4.6678
PITRM1	-0.13703	10.7752	-1.64112	0.114214	0.790342	-4.66811
CLCN2	-0.101425	7.97791	-1.64102	0.114235	0.790342	-4.66825
PAK1	-0.145322	10.4416	-1.64101	0.114239	0.790342	-4.66827
TTLL7	-0.0991574	8.3353	-1.64063	0.114316	0.790455	-4.66879
KMT2C	-0.214668	8.82006	-1.63894	0.114672	0.792111	-4.67118
TMEM181	-0.129336	11.3951	-1.63891	0.114678	0.792111	-4.67122
CTF1	-0.117328	8.08967	-1.63833	0.1148	0.792381	-4.67204
ATPIF1	-0.194107	9.45246	-1.63803	0.114863	0.792381	-4.67246
ANKRD34A	0.142351	8.41274	1.63785	0.114901	0.792381	-4.67272
AIMP2	0.0945098	12.2253	1.63689	0.115102	0.793172	-4.67406
RPA1	-0.106618	12.5845	-1.63651	0.115181	0.793172	-4.67459
FGD6	0.217294	8.59222	1.63619	0.11525	0.793172	-4.67505
LIG3	-0.119008	9.13336	-1.63601	0.115288	0.793172	-4.6753
STX11	0.160509	7.97836	1.63585	0.115322	0.793172	-4.67553
EIF3CL	-0.307926	9.58146	-1.63543	0.115409	0.793224	-4.67611
SPECC1L	-0.134815	9.40973	-1.63523	0.115452	0.793224	-4.67639
JMJD4	0.129155	8.88867	1.63457	0.115591	0.793515	-4.67732
CRELD1	0.391563	7.93747	1.63421	0.115666	0.793515	-4.67782
ARAP2	-0.154014	8.4785	-1.63416	0.115678	0.793515	-4.67789
NKX3-2	0.142296	9.44452	1.63387	0.115739	0.793518	-4.6783
WDR26	0.151255	10.367	1.63325	0.11587	0.793992	-4.67917
GRIP2	0.128677	7.81423	1.6315	0.11624	0.794535	-4.68162
HACD1	-0.129709	11.7122	-1.63079	0.11639	0.794535	-4.68261
KGFLP1	-0.0959521	7.82657	-1.63061	0.116429	0.794535	-4.68286
PRR3	0.206406	9.59005	1.63058	0.116436	0.794535	-4.68291
STX1A	-0.240639	11.3978	-1.63037	0.116479	0.794535	-4.6832
GALNT3	0.160911	9.46821	1.63028	0.116499	0.794535	-4.68333
YTHDF1	0.105671	11.8291	1.62958	0.116648	0.794535	-4.68431
RRP36	0.117395	12.3339	1.62954	0.116656	0.794535	-4.68436
GUSBP2	-0.132602	8.63976	-1.62942	0.116683	0.794535	-4.68454
UFSP1	-0.130953	7.87545	-1.62932	0.116704	0.794535	-4.68468
TMEM173	0.129939	11.2295	1.62911	0.116749	0.794535	-4.68497
MRE11A	0.268671	9.68114	1.62908	0.116755	0.794535	-4.68502
PEX11G	0.144361	8.34831	1.62869	0.116837	0.794535	-4.68555
SMARCA4	-0.102102	12.6247	-1.62854	0.116869	0.794535	-4.68576
AKR1C2	0.14245	7.7084	1.62854	0.116869	0.794535	-4.68576
LARP7	0.415773	9.97806	1.62715	0.117166	0.795769	-4.68771
KIF25-AS1	0.14688	7.44262	1.62712	0.117173	0.795769	-4.68776
IK	-0.123845	11.712	-1.62555	0.117507	0.796449	-4.68994
NINL	-0.130898	8.47528	-1.62518	0.117587	0.796449	-4.69046
MAPT	-0.113139	7.84842	-1.62488	0.117652	0.796449	-4.69089
UTP3	-0.122187	10.5254	-1.62447	0.11774	0.796449	-4.69146
PP14571	-0.192992	7.81044	-1.62432	0.117771	0.796449	-4.69166
SEMA4B	0.116656	7.65855	1.62397	0.117847	0.796449	-4.69216
HLA-DRB3	0.176402	9.88499	1.62394	0.117854	0.796449	-4.6922
PCBP2	-0.158398	8.90203	-1.62318	0.118016	0.796449	-4.69326
TOP1	-0.188925	9.46035	-1.62297	0.118062	0.796449	-4.69355
MIR335	-0.103497	7.76654	-1.62289	0.118079	0.796449	-4.69366
GGTLC1	-0.110493	7.7501	-1.62235	0.118195	0.796449	-4.69442
RFK	-0.138416	8.12176	-1.62182	0.118307	0.796449	-4.69515
KDELR2	0.10649	11.5337	1.62141	0.118396	0.796449	-4.69572
ERCC6L	-0.150336	9.33428	-1.62124	0.118434	0.796449	-4.69597
OSCAR	-0.148797	8.24252	-1.62076	0.118537	0.796449	-4.69663
TPGS2	-0.184745	9.42	-1.61978	0.118748	0.796449	-4.698
ISG20	0.172008	11.8168	1.61955	0.118798	0.796449	-4.69832
MIR1267	-0.133114	8.2881	-1.61947	0.118814	0.796449	-4.69842
EIF3G	0.15391	12.9964	1.61944	0.118821	0.796449	-4.69847
RILP	0.175743	7.54285	1.61935	0.118841	0.796449	-4.69859
VNN1	0.130693	7.95861	1.61915	0.118883	0.796449	-4.69887
WSB1	0.22451	9.66556	1.61885	0.11895	0.796449	-4.6993
STBD1	0.135191	8.41528	1.61882	0.118956	0.796449	-4.69934
BRICD5	-0.122768	8.11111	-1.61858	0.119008	0.796449	-4.69967
MTMR9	-0.118438	10.0848	-1.61838	0.119051	0.796449	-4.69995
RALGDS	-0.144369	8.18943	-1.61809	0.119114	0.796449	-4.70036
EPN1	-0.129585	13.1173	-1.61801	0.119131	0.796449	-4.70046
THAP1	-0.161934	9.00078	-1.61782	0.119172	0.796449	-4.70073
XRCC1	-0.156459	9.12304	-1.61768	0.119202	0.796449	-4.70092
WDR5	0.380189	8.13872	1.61761	0.119217	0.796449	-4.70102
IRF2BPL	-0.135996	12.2553	-1.61737	0.11927	0.796449	-4.70136
SYDE1	0.122344	11.5531	1.61725	0.119295	0.796449	-4.70152
SGPL1	-0.109358	8.79526	-1.61682	0.119388	0.796449	-4.70211
GSTM4	0.0984835	7.92053	1.61661	0.119434	0.796449	-4.70241
MYADM	-0.17038	13.5717	-1.61658	0.11944	0.796449	-4.70245
FGF18	-0.107531	8.08232	-1.61637	0.119486	0.796449	-4.70274
ZNF442	0.118033	8.22442	1.61582	0.119606	0.796629	-4.70351
MDH2	0.0983999	13.9618	1.61523	0.119733	0.796629	-4.70432
TFAP4	-0.149501	8.32569	-1.61496	0.119792	0.796629	-4.7047
CWF19L1	0.111417	11.0721	1.61494	0.119796	0.796629	-4.70472
AHCYL2	-0.122872	8.50475	-1.61483	0.11982	0.796629	-4.70488
HIST1H2BE	0.143766	8.17711	1.61377	0.120053	0.797554	-4.70636
RPS2	0.132117	14.0394	1.61355	0.120099	0.797554	-4.70666
SF3A1	-0.110814	9.19143	-1.61303	0.120213	0.797554	-4.70739
MTHFD2	-0.279746	10.4585	-1.61282	0.120258	0.797554	-4.70768
CAST	0.168683	9.60183	1.61274	0.120276	0.797554	-4.70779
UHMK1	0.166083	8.89451	1.6125	0.120329	0.797554	-4.70812
ZNF227	-0.143021	8.93307	-1.61186	0.120468	0.797784	-4.709
RAB6A	-0.30513	9.4921	-1.61178	0.120486	0.797784	-4.70912
ABHD3	-0.179279	9.00216	-1.61127	0.120597	0.798108	-4.70983
PPP1R42	0.147741	7.51422	1.6097	0.120941	0.79895	-4.712
NFKBID	0.108737	8.01675	1.60859	0.121184	0.79895	-4.71354
LEMD3	-0.224811	10.4031	-1.60762	0.121397	0.79895	-4.71489
ADIPOR2	-0.104463	11.2483	-1.60719	0.121492	0.79895	-4.71548
SNORA45A	0.112171	8.13989	1.60717	0.121496	0.79895	-4.71551
RGS20	-0.122258	9.87274	-1.60703	0.121527	0.79895	-4.7157
ZNF491	-0.113794	7.95873	-1.60696	0.121543	0.79895	-4.71581
C15orf52	-0.157493	13.1428	-1.60689	0.121559	0.79895	-4.71591
IL17RC	0.175223	8.6734	1.60667	0.121607	0.79895	-4.71621
ZFAND2B	-0.141978	10.4467	-1.60661	0.12162	0.79895	-4.71629
ADPRHL2	0.157722	11.1533	1.60617	0.121716	0.79895	-4.71689
LINC01364	0.130976	7.8627	1.60547	0.121871	0.79895	-4.71786
RFC3	-0.119406	9.72792	-1.60545	0.121876	0.79895	-4.71789
LOC642980	-0.0909364	7.7499	-1.60497	0.121982	0.79895	-4.71856
CDKN1C	0.165768	8.84145	1.6048	0.122019	0.79895	-4.71879
POGLUT1	-0.111126	9.88596	-1.60472	0.122038	0.79895	-4.71891
HSPA2	0.0932604	7.89637	1.60454	0.122076	0.79895	-4.71915
DOLPP1	0.113161	9.74863	1.60426	0.122139	0.79895	-4.71954
NBL1	-0.215431	10.9489	-1.6042	0.122151	0.79895	-4.71962
TMEM138	-0.118139	10.1721	-1.60409	0.122175	0.79895	-4.71977
MKNK1	0.122377	9.706	1.60403	0.122188	0.79895	-4.71985
SEC13	0.136157	11.0887	1.60387	0.122224	0.79895	-4.72007
GPCPD1	0.152263	8.38475	1.60369	0.122264	0.79895	-4.72032
CGN	0.154942	7.94523	1.6032	0.122373	0.79895	-4.721
SPRED3	-0.131895	7.61867	-1.60317	0.12238	0.79895	-4.72105
BET1L	-0.154642	8.89768	-1.60308	0.122399	0.79895	-4.72116
ZNF521	-0.186416	8.89497	-1.60199	0.12264	0.79895	-4.72267
SLC12A8	0.125857	8.0868	1.60198	0.122644	0.79895	-4.7227
ADHFE1	0.116706	8.03597	1.60142	0.122766	0.79895	-4.72346
SPAG4	0.189501	8.6479	1.60122	0.122811	0.79895	-4.72373
REC8	0.1951	8.87159	1.6011	0.122839	0.79895	-4.72391
PCYT2	0.166863	9.03943	1.60104	0.122852	0.79895	-4.72399
AVL9	-0.138945	8.7873	-1.60084	0.122896	0.79895	-4.72426
PLEKHF1	0.185977	8.89676	1.60076	0.122914	0.79895	-4.72438
KRT7	0.192007	11.3339	1.60064	0.122941	0.79895	-4.72454
RAB34	0.12869	12.0418	1.60063	0.122944	0.79895	-4.72456
DGKH	-0.10093	7.94054	-1.59988	0.12311	0.799384	-4.72559
CDX2	-0.155445	7.46798	-1.59977	0.123134	0.799384	-4.72574
NDUFC1	0.0902285	10.2958	1.59931	0.123236	0.799521	-4.72637
C4A	-0.110379	7.83528	-1.59882	0.123346	0.799521	-4.72705
[truncated: 10,960 more rows]
