# Supplementary material for: MiR-302b as a Combinatorial Therapeutic Approach to Improve Cisplatin Chemotherapy Efficacy in Human Triple-Negative Breast Cancer
Source: Cancers (Basel). 2020 Aug 12;12(8):2261. doi: 10.3390/cancers12082261 (PMC7464985; doi:10.3390/cancers12082261)
Supplement: Supplementary file 1 [file cancers-12-02261-s001.zip › ST2.xlsx]

## Sheet: PASTAA_Results
ST2: Summary of the TFs in silico analysis including oPOSSUM, PASTAA and miRwalk results
Matrix	Gene	Transcription Factor	Association Score	P-Value
NKX25_01	NKX25	Nkx2-5	3.057	0.00632
CDPCR3_01	CDPCR3	Cutl1	2.823	0.0107
TGIF_01	TGIF	Tgif	2.744	0.0119
MYB_Q3	MYB	C-myb	2.715	0.0141
YY1_01	YY1	Yy1	0.4279	0.0141
DR3_Q4	DR3	Car , Pxr-1	2.646	0.0153
SMAD4_Q6	SMAD4	Smad4	2.646	0.0153
MYB_Q5_01	MYB	B-myb , C-myb	2.581	0.0167
SMAD_Q6	SMAD	Smad1 , Smad1.1	2.521	0.0198
MEIS1_01	MEIS1	Meis-1 , Meis-1-1	2.316	0.029
ROAZ_01	ROAZ	Roaz	2.288	0.0301
R_01	R	N/A	2.256	0.0318
IRF1_Q6	IRF1	Irf-1	2.221	0.0353
LMO2COM_02	LMO2COM	Lmo2	2.221	0.0353
GATA1_02	GATA1	Gata-1	2.217	0.0353
HNF4_Q6_01	HNF4	Hnf-4 , Hnf-4alpha	2.158	0.0392
LXR_DR4_Q3	LXR	N/A	2.151	0.0398
AP2REP_01	AP2REP	Ap-2rep	2.125	0.0431
TAXCREB_01	TAXCREB	Creb , Deltacreb	2.125	0.0431
GATA1_04	GATA1	Gata-1	2.124	0.0431
LRF_Q2	LRF	Fbi-1 , Lrf	2.123	0.0438
ATF_01	ATF	N/A	2.069	0.0476
RSRFC4_01	RSRFC4	Rsrfc4	2.046	0.0482
RSRFC4_Q2	RSRFC4	Rsrfc4	2.046	0.0482
HOXA7_01	HOXA7	N/A	2.038	0.0491
AHR_Q5	AHR	Ahr	1.95	0.0591
ATF6_01	ATF6	Atf6	1.946	0.0622
ATF4_Q2	ATF4	Atf-4 , Atf4	1.922	0.0634
CREBP1_01	CREBP1	Atf-2	1.866	0.0711
GATA2_02	GATA2	Gata-2	1.852	0.0735
NKX25_Q5	NKX25	Nkx2-5 , Nkx2.5	1.852	0.0735
ZF5_B	ZF5	Zf5	1.84	0.0749
CMAF_01	CMAF	C-maf	1.825	0.077
FOXO4_02	FOXO4	Foxo4	1.825	0.077
FREAC2_01	FREAC2	Foxf2	1.825	0.077
IRF_Q6_01	IRF	Irf-1 , Irf-10	1.824	0.0777
INR_DPE_HAND50	INR	N/A	1.747	0.0873
MEF2_02	MEF2	Mef-2a , Amef-2	1.747	0.0873
MEF2_03	MEF2	Mef-2a , Amef-2	1.747	0.0873
NF1_Q6	NF1	Nf-1	1.739	0.0876
HEB_Q6	HEB	Heb	1.73	0.0887
SF1_Q6_01	SF1	N/A	1.679	0.0974
TAACC_B	TAACC	N/A	1.679	0.0974
OSF2_Q6	OSF2	Aml3a , Pebp2alpha	1.674	0.0974
AP4_Q6_01	AP4	Ap-4	1.651	0.101
E2F1_Q3_01	E2F1	E2f-1	1.642	0.107
CREB_Q3	CREB	Atf-1 , Atf-2	1.623	0.108
DELTAEF1_01	DELTAEF1	Deltaef1	1.623	0.108
MAZR_01	MAZR	Mazr	1.618	0.108
ZIC3_01	ZIC3	Zic3	1.61	0.11
CETS1P54_02	CETS1P54	C-ets-1	1.592	0.11
INR_DPE_HAND100	INR	N/A	1.572	0.117
IRF7_01	IRF7	Irf-7a	1.57	0.117
HES1_Q2	HES1	Hes-1	1.543	0.124
IK1_01	IK1	Ik-1	1.538	0.124
E47_02	E47	E47	1.53	0.125
MSX1_01	MSX1	Msx-1	1.526	0.127
OCT1_02	2001-10-01	Pou2f1 , Pou2f1a	1.526	0.127
ARP1_01	ARP1	Coup-tf2	1.525	0.128
IRF_Q6	IRF	Irf-1 , Irf-10	1.525	0.128
SF1_Q6	SF1	Sf-1	1.525	0.128
CREB_01	CREB	Creb , Deltacreb	1.479	0.133
AHRHIF_Q6	AHRHIF	Arnt2 , Ahr	1.477	0.135
HMEF2_Q6	HMEF2	Mef-2a	1.449	0.144
AP2ALPHA_02	AP2ALPHA	Ap-2alphaa	1.447	0.144
MYB_Q6	MYB	C-myb	1.447	0.144
ZIC1_01	ZIC1	Zic1	1.391	0.157
ICSBP_Q6	ICSBP	Irf-8	1.382	0.158
TBX5_Q5	TBX5	Tbx5 , Tbx5	1.38	0.159
BLIMP1_Q6	BLIMP1	Blimp-1	1.38	0.159
HNF4_DR1_Q3	HNF4	Hnf-4 , Hnf-4alpha	1.38	0.159
ATF1_Q6	ATF1	Atf-1	1.359	0.161
ATF3_Q6	ATF3	Atf3	1.359	0.161
CREB_Q4_01	CREB	Creb , Crebbeta	1.359	0.161
CREB_02	CREB	Creb , Deltacreb	1.358	0.161
MEF2_01	MEF2	Mef-2a , Amef-2	1.354	0.164
NFE2_01	NFE2	Nf-e2	1.353	0.164
EGR2_01	EGR2	Egr-2	1.346	0.17
XFD3_01	XFD3	Hnf-3beta	1.324	0.172
GATA_Q6	GATA	Gata-1 , Gata-2	1.318	0.173
GATA1_05	GATA1	Gata-1	1.288	0.181
HFH4_01	HFH4	Foxf1 , Foxj1	1.275	0.185
LDSPOLYA_B	LDSPOLYA	N/A	1.275	0.185
PEA3_Q6	PEA3	Pea3	1.275	0.185
TAL1ALPHAE47_01	TAL1ALPHAE47	E47 , Tal-1alpha	1.275	0.185
CMYB_01	CMYB	N/A	1.272	0.185
DR1_Q3	DR1	Coup-tf1 , Coup-tf2	1.272	0.185
HNF4_01_B	HNF4	Hnf-4alpha1	1.272	0.185
HNF4_01	HNF4	Hnf-4alpha1 , Hnf-4alpha2	1.271	0.185
STAT1_03	STAT1	Stat1alpha	1.27	0.185
BACH2_01	BACH2	Bach2	1.269	0.185
HEN1_02	HEN1	N/A	1.26	0.187
ATF_B	ATF	N/A	1.255	0.19
E4F1_Q6	E4F1	N/A	1.254	0.19
E4BP4_01	E4BP4	E4bp4	1.243	0.191
VBP_01	VBP	Vbp	1.243	0.191
CREB_Q4	CREB	Creb	1.233	0.194
KROX_Q6	KROX	Egr-1 , Egr-2	1.231	0.194
SRY_01	SRY	Sry	1.23	0.195
DR4_Q2	DR4	Car , Coup-tf1	1.215	0.2
NCX_01	NCX	Ncx , Ncx	1.211	0.2
NRSF_01	NRSF	Nrsf	1.181	0.209
CREB_Q2_01	CREB	Creb , Crebbeta	1.156	0.216
PAX_Q6	PAX	Pax-1 , Pax-2	1.155	0.216
OCT1_07	2001-10-01	Pou2f1 , Pou2f1a	1.154	0.217
OCT1_Q6	2001-10-01	Pou2f1 , Pou2f1a	1.154	0.217
FOXO1_02	FOXO1	Foxo1 , Foxo1a	1.153	0.217
FREAC4_01	FREAC4	Foxd1	1.153	0.217
FOXO4_01	FOXO4	Foxo4	1.152	0.217
ZID_01	ZID	Zid	1.152	0.217
GATA6_01	GATA6	Gata-6 , Gata-6a	1.146	0.217
LBP1_Q6	LBP1	N/A	1.118	0.228
SREBP1_01	SREBP1	Srebp-1 , Srebp-1a	1.102	0.232
STAT3_01	STAT3	Stat3	1.098	0.234
CREBP1_Q2	CREBP1	Atf-2 , Cre-bp1	1.091	0.234
CREB_Q2	CREB	Creb	1.091	0.234
AREB6_04	AREB6	Zeb	1.09	0.234
PR_02	PR	N/A	1.088	0.235
RP58_01	RP58	Rp58	1.088	0.235
TITF1_Q3	TITF1	Nkx2-1	1.088	0.235
TAL1_Q6	TAL1	Tal-1 , Tal-1alpha	1.086	0.238
CREBP1CJUN_01	CREBP1CJUN	Atf-2 , C-jun	1.085	0.238
RBPJK_01	RBPJK	N/A	1.085	0.238
EVI1_01	EVI1	Evi-1	1.062	0.24
LYF1_01	LYF1	N/A	1.062	0.241
CHX10_01	CHX10	Chx10	1.061	0.243
EGR3_01	EGR3	Egr-3	1.06	0.243
STRA13_01	STRA13	Stra13	1.057	0.247
AREB6_02	AREB6	Zeb	1.056	0.247
MZF1_02	MZF1	Mzf-1	1.041	0.252
IRF1_01	IRF1	Irf-1	1.034	0.252
ELK1_02	ELK1	Elk-1	1.032	0.252
TAL1BETAITF2_01	TAL1BETAITF2	Itf-2 , Tal-1beta	1.031	0.252
SEF1_C	SEF1	N/A	1.029	0.252
LUN1_HAND	LUN1	N/A	1.01	0.256
VMAF_01	VMAF	V-maf	0.998	0.262
AFP1_Q6	AFP1	N/A	0.986	0.266
AP1_01	AP1	Fosb , Fra-1	0.985	0.266
ISRE_01	ISRE	N/A	0.983	0.266
PAX2_02	PAX2	Pax-2 , Pax-2.1	0.981	0.266
MYOGENIN_Q6	MYOGENIN	Myogenin	0.97	0.268
CREBATF_Q6	CREBATF	Atf-1 , Atf-2	0.944	0.278
FOXP3_Q4	FOXP3	Foxp3	0.941	0.279
TBX5_01	TBX5	Tbx5	0.941	0.279
FOXO3A_Q1	FOXO3A	N/A	0.939	0.281
FOXO3_01	FOXO3	Foxo3	0.939	0.281
PAX6_Q2	PAX6	Pax-6	0.939	0.281
AR_Q2	AR	Ar	0.939	0.281
FOXJ2_02	FOXJ2	Foxj2	0.923	0.284
COMP1_01	COMP1	N/A	0.922	0.285
HEN1_01	HEN1	N/A	0.895	0.291
HIF1_Q5	HIF1	Hif-1alpha	0.895	0.291
HNF4_Q6	HNF4	Hnf-4 , Hnf-4alpha	0.891	0.295
HNF4_Q6_03	HNF4	Hnf-4 , Hnf-4alpha1	0.891	0.297
ER_Q6_02	ER	Er-alpha , Er-beta	0.849	0.306
PAX9_B	PAX9	Pax-9a	0.849	0.306
MEF2_04	MEF2	Mef-2a , Amef-2	0.821	0.315
CAAT_C	CAAT	N/A	0.82	0.315
OCT1_Q5_01	2001-10-01	Pou2f1 , Pou2f1a	0.818	0.315
OCT_Q6	OCT	Oca-b , Pou2f1	0.818	0.315
AREB6_01	AREB6	Zeb	0.807	0.316
GATA3_02	GATA3	Gata-3	0.804	0.319
MEIS1AHOXA9_01	MEIS1AHOXA9	Hoxa9 , Hoxa9b	0.804	0.319
TATA_C	TATA	Tbp	0.803	0.32
MYOD_01	MYOD	Myod	0.778	0.325
AP1_Q2_01	AP1	Fosb , Fra-1	0.776	0.329
HIC1_03	HIC1	Hic-1	0.776	0.329
PPARA_02	PPARA	Ppar-alpha , Rxr-alpha	0.757	0.336
DEC_Q1	DEC	Bhlhb2 , Bhlhb3	0.746	0.337
SZF11_01	SZF11	N/A	0.746	0.337
HMX1_01	HMX1	N/A	0.741	0.339
KAISO_01	KAISO	N/A	0.741	0.339
HIF1_Q3	HIF1	Hif-1alpha	0.733	0.339
RORA1_Q4	RORA1	N/A	0.718	0.347
T3R_01	T3R	N/A	0.717	0.347
CEBPA_01	CEBPA	C/ebp , C/ebpalpha	0.707	0.351
HMGIY_Q3	HMGIY	Hmg , Hmg-y	0.707	0.351
OCT1_05	2001-10-01	N/A	0.707	0.351
MEIS1BHOXA9_02	MEIS1BHOXA9	Hoxa9 , Hoxa9b	0.705	0.351
SOX_Q6	SOX	Sry , Sox10	0.705	0.351
MRF2_01	MRF2	Mrf-2	0.704	0.351
TBP_01	TBP	Tbp	0.7	0.352
UF1H3BETA_Q6	UF1H3BETA	N/A	0.691	0.353
STAT5A_01	STAT5A	Stat5a	0.68	0.359
AR_02	AR	Ar	0.676	0.359
E2A_Q2	E2A	E12 , E47	0.664	0.365
RREB1_01	RREB1	Rreb-1	0.659	0.368
CEBP_Q2	CEBP	C/ebp , C/ebpalpha	0.647	0.37
MEF2_Q6_01	MEF2	Mef-2c/delta8 , Mef-2dab	0.647	0.37
SMAD_Q6_01	SMAD	Smad1 , Smad1.1	0.647	0.37
STAT6_01	STAT6	Stat6	0.647	0.37
SOX5_01	SOX5	Sox5	0.645	0.371
STAT5B_01	STAT5B	Stat5a , Stat5b	0.629	0.377
SP1_01	SP1	Sp1	0.628	0.377
AP4_01	AP4	Ap-4	0.621	0.378
ETS2_B	ETS2	C-ets-1 , C-ets-2	0.621	0.378
ETS_Q6	ETS	Elf-1 , Elfr	0.619	0.382
GC_01	GC	N/A	0.619	0.382
P53_01	P53	P53	0.619	0.382
MYOD_Q6_01	MYOD	E12 , E47	0.619	0.384
CP2_01	CP2	Cp2	0.616	0.384
CBF_01	CBF	N/A	0.597	0.385
TATA_01	TATA	Tbp	0.595	0.385
E2A_Q6	E2A	E12 , E47	0.579	0.393
HSF1_01	HSF1	Hsf1 , Hsf1long	0.579	0.393
T3R_Q6	T3R	Rar-alpha1 , Rar-beta	0.566	0.397
AHRARNT_01	AHRARNT	Ahr , Arnt	0.563	0.399
IRF2_01	IRF2	Irf-2	0.552	0.401
GEN_INI3_B	GEN	N/A	0.551	0.401
ZIC2_01	ZIC2	Zic2 , Zic2	0.544	0.403
GLI_Q2	GLI	Gli1 , Gli2alpha	0.522	0.412
NGFIC_01	NGFIC	Egr-4	0.514	0.414
AP4_Q5	AP4	Ap-4	0.513	0.414
TEF1_Q6	TEF1	Tef-1	0.484	0.424
EGR1_01	EGR1	Egr-1	0.471	0.426
PAX1_B	PAX1	Pax-1	0.471	0.426
PTF1BETA_Q6	PTF1BETA	N/A	0.458	0.435
AHRARNT_02	AHRARNT	Ahr , Arnt	0.434	0.439

## Sheet: oPOSSUM_Results
ST2: Summary of the TFs in silico analysis including oPOSSUM, PASTAA and miRwalk results
TF	JASPAR ID	Class	Family	Target gene hits	Fisher score	Tax Group	IC	GC Content	Background gene hits	Background gene non-hits	Target TFBS hits	Target TFBS nucleotide rate	Background TFBS hits	Background TFBS nucleotide rate	Z-score
NKX25	MA0063.1	Helix-Turn-Helix	Homeo	31	3.517	vertebrates	8.27	0.218	16973	7779	513	0.0483	197210	0.0384	14.046
ELF5	MA0136.1	Winged Helix-Turn-Helix	Ets	29	2.393	vertebrates	8.693	0.429	16547	8205	258	0.0312	117435	0.0294	2.952
AP1	MA0099.2	Zipper-Type	Leucine Zipper	29	2.539	vertebrates	9.193	0.405	16390	8362	249	0.0234	113253	0.022	2.577
Pdx1	MA0132.1	Helix-Turn-Helix	Homeo	27	2.05	vertebrates	9.04	0.194	15507	9245	360	0.029	140973	0.0235	9.931
SPIB	MA0081.1	Winged Helix-Turn-Helix	Ets	27	0.752	vertebrates	9.06	0.466	17547	7205	358	0.0337	175639	0.0342	-0.744
HOXA5	MA0158.1	Helix-Turn-Helix	Homeo	26	0.462	vertebrates	8.759	0.315	17629	7123	488	0.0525	205993	0.0458	8.695
ARID3A	MA0151.1	Helix-Turn-Helix	Arid	26	1.161	vertebrates	9.896	0.062	16086	8666	404	0.0326	166235	0.0277	8.062
ZEB1	MA0103.1	Zinc-coordinating	BetaBetaAlpha-zinc finger	26	0.522	vertebrates	8.305	0.557	17454	7298	386	0.0311	171132	0.0285	4.233
NFATC2	MA0152.1	Ig-fold	Rel	26	1.762	vertebrates	9.859	0.346	15176	9576	201	0.0189	97757	0.019	-0.229
YY1	MA0095.1	Zinc-coordinating	BetaBetaAlpha-zinc finger	26	0.621	vertebrates	8.101	0.51	17190	7562	335	0.027	165054	0.0275	-0.859
Nobox	MA0125.1	Helix-Turn-Helix	Homeo	25	2.526	vertebrates	9.573	0.26	13558	11194	213	0.0229	77190	0.0172	12.041
Nkx3-2	MA0122.1	Helix-Turn-Helix	Homeo	25	1.15	vertebrates	8.542	0.463	15425	9327	197	0.0238	91612	0.0229	1.655
MZF1	MA0056.1	Zinc-coordinating	BetaBetaAlpha-zinc finger	25	0.501	vertebrates	8.586	0.725	16863	7889	415	0.0335	201000	0.0335	-0.088
FEV	MA0156.1	Winged Helix-Turn-Helix	Ets	25	1.163	vertebrates	12.121	0.442	15402	9350	167	0.018	81722	0.0182	-0.45
ZNF354C	MA0130.1	Zinc-coordinating	BetaBetaAlpha-zinc finger	AP1	0.298	vertebrates	8.958	0.615	17566	7186	423	0.0341	207738	0.0346	-0.8
Gfi	MA0038.1	Zinc-coordinating	BetaBetaAlpha-zinc finger	25	2.371	vertebrates	9.47	0.391	13731	11021	130	0.0175	65844	0.0183	-1.697
CEBPA	MA0102.2	Zipper-Type	Leucine Zipper	24	2.566	vertebrates	8.712	0.358	12828	11924	152	0.0184	55606	0.0139	10.413
SRY	MA0084.1	Other Alpha-Helix	High Mobility Group	24	1.17	vertebrates	9.193	0.238	14714	10038	252	0.0305	101929	0.0255	8.618
ELK1	MA0028.1	Winged Helix-Turn-Helix	Ets	24	1.882	vertebrates	8.812	0.568	13642	11110	125	0.0168	54748	0.0152	3.516
Gata1	MA0035.2	Zinc-coordinating	GATA	24	1.388	vertebrates	10.878	0.373	14350	10402	164	0.0242	75905	0.0232	1.874
SPI1	MA0080.2	Winged Helix-Turn-Helix	Ets	24	0.652	vertebrates	9.64	0.435	15792	8960	207	0.0195	95792	0.0186	1.679
FOXD1	MA0031.1	Winged Helix-Turn-Helix	Forkhead	23	1.79	vertebrates	11.926	0.275	13087	11665	183	0.0197	62921	0.014	13.192
Foxa2	MA0047.2	Winged Helix-Turn-Helix	Forkhead	23	3.051	vertebrates	13.268	0.315	11656	13096	122	0.0197	43535	0.0145	11.745
NKX3-1	MA0124.1	Helix-Turn-Helix	Homeo	23	2.127	vertebrates	11.127	0.179	12654	12098	192	0.0181	68823	0.0134	11.078
Prrx2	MA0075.1	Helix-Turn-Helix	Homeo	23	0.679	vertebrates	9.063	0.027	15063	9689	308	0.0207	123270	0.0171	7.487
RUNX1	MA0002.2	Ig-fold	Runt	23	1.409	vertebrates	10.401	0.502	13641	11111	142	0.021	58648	0.0179	6.285
Klf4	MA0039.2	Zinc-coordinating	BetaBetaAlpha-zinc finger	23	1.407	vertebrates	12.618	0.771	13645	11107	178	0.0239	88731	0.0247	-1.308
Arnt::Ahr	MA0006.1	Zipper-Type	Helix-Loop-Helix	23	1.437	vertebrates	9.532	0.715	13597	11155	128	0.0103	66086	0.011	-1.841
TBP	MA0108.2	Beta-sheet	TATA-binding	22	3.722	vertebrates	10.086	0.377	10389	14363	94	0.0189	33775	0.0141	11.26
Sox5	MA0087.1	Other Alpha-Helix	High Mobility Group	22	1.336	vertebrates	10.831	0.199	13087	11665	192	0.0181	72042	0.014	9.378
FOXA1	MA0148.1	Winged Helix-Turn-Helix	Forkhead	22	1.178	vertebrates	12.533	0.332	13355	11397	161	0.0238	63112	0.0193	8.927
FOXO3	MA0157.1	Winged Helix-Turn-Helix	Forkhead	22	1.039	vertebrates	11.734	0.298	13611	11141	180	0.0194	69410	0.0154	8.663
FOXI1	MA0042.1	Winged Helix-Turn-Helix	Forkhead	21	1.841	vertebrates	13.183	0.263	11680	13072	136	0.0219	49366	0.0165	11.712
Sox17	MA0078.1	Other Alpha-Helix	High Mobility Group	21	0.625	vertebrates	10.502	0.384	13879	10873	146	0.0177	65883	0.0165	2.516
NR4A2	MA0160.1	Zinc-coordinating	Hormone-nuclear Receptor	21	0.619	vertebrates	10.165	0.491	13896	10856	96	0.0103	60034	0.0133	-7.208
Foxd3	MA0041.1	Winged Helix-Turn-Helix	Forkhead	20	1.599	vertebrates	12.945	0.223	11354	13398	116	0.0187	49535	0.0165	4.669
Hand1::Tcfe2a	MA0092.1	Zipper-Type	Helix-Loop-Helix	20	0.6	vertebrates	10.144	0.507	13286	11466	109	0.0146	54768	0.0152	-1.288
CREB1	MA0018.2	Zipper-Type	Leucine Zipper	20	3.606	vertebrates	10.139	0.523	9204	15548	35	0.00376	19712	0.00438	-2.586
REL	MA0101.1	Ig-fold	Rel	20	2.254	vertebrates	10.515	0.559	10514	14238	54	0.00726	29250	0.00813	-2.668
SOX9	MA0077.1	Other Alpha-Helix	High Mobility Group	19	1.147	vertebrates	9.079	0.358	11417	13335	87	0.0105	41403	0.0104	0.433
Myb	MA0100.1	Helix-Turn-Helix	Myb	19	0.336	vertebrates	9.883	0.591	13518	11234	122	0.0131	58600	0.013	0.197
EBF1	MA0154.1	Zipper-Type	Helix-Loop-Helix	19	1.221	vertebrates	11.564	0.648	11288	13464	79	0.0106	39149	0.0109	-0.708
MZF1_5-13	MA0057.1	Zinc-coordinating	BetaBetaAlpha-zinc finger	18	0.221	vertebrates	9.4	0.588	13425	11327	164	0.022	77649	0.0216	0.854
Myf	MA0055.1	Zipper-Type	Helix-Loop-Helix	18	1.52	vertebrates	15.914	0.609	10157	14595	46	0.00742	27519	0.00918	-5.05
SP1	MA0079.2	Zinc-coordinating	BetaBetaAlpha-zinc finger	17	0.292	vertebrates	11.129	0.82	12391	12361	177	0.0238	79797	0.0222	2.973
Tcfcp2l1	MA0145.1	Other	CP2	17	0.893	vertebrates	11.65	0.609	10591	14161	62	0.0117	32190	0.0125	-2.123
HIF1A::ARNT	MA0259.1	Zipper-Type	Helix-Loop-Helix	17	0.748	vertebrates	9.74	0.657	10914	13838	68	0.00731	37662	0.00837	-3.2
Stat3	MA0144.1	Ig-fold	Stat	16	0.917	vertebrates	13.601	0.505	9883	14869	52	0.00699	23645	0.00657	1.387
GABPA	MA0062.2	Winged Helix-Turn-Helix	Ets	16	1.202	vertebrates	13.335	0.647	9355	15397	44	0.0065	20927	0.0064	0.344
Myc	MA0147.1	Zipper-Type	Helix-Loop-Helix	16	1.966	vertebrates	11.157	0.686	8288	16464	37	0.00497	18476	0.00513	-0.644
USF1	MA0093.1	Zipper-Type	Helix-Loop-Helix	16	1.217	vertebrates	11.29	0.643	9330	15422	40	0.00376	21993	0.00428	-2.182
Esrrb	MA0141.1	Zinc-coordinating	Hormone-nuclear Receptor	16	0.785	vertebrates	12.806	0.524	10167	14585	46	0.00742	26346	0.00878	-4.017
NFIL3	MA0025.1	Zipper-Type	Leucine Zipper	15	2.908	vertebrates	14.139	0.265	6731	18021	48	0.0071	15828	0.00484	8.848
MEF2A	MA0052.1	Other Alpha-Helix	MADS	15	2.6	vertebrates	15.709	0.179	7006	17746	41	0.00551	15631	0.00434	4.809
NFE2L2	MA0150.1	Zipper-Type	Leucine Zipper	15	4.433	vertebrates	14.394	0.486	5635	19117	21	0.0031	8970	0.00274	1.855
Zfx	MA0146.1	Zinc-coordinating	BetaBetaAlpha-zinc finger	15	0.635	vertebrates	13.077	0.749	9872	14880	70	0.0132	33238	0.0129	0.56
RELA	MA0107.1	Ig-fold	Rel	15	2.427	vertebrates	14.757	0.567	7171	17581	28	0.00376	13690	0.0038	-0.214
MAX	MA0058.1	Zipper-Type	Helix-Loop-Helix	15	1.693	vertebrates	12.685	0.571	7993	16759	29	0.0039	15900	0.00442	-2.171
Arnt	MA0004.1	Zipper-Type	Helix-Loop-Helix	15	2.551	vertebrates	10.992	0.642	7052	17700	24	0.00194	13904	0.00232	-2.211
Foxq1	MA0040.1	Winged Helix-Turn-Helix	Forkhead	14	1.235	vertebrates	14.07	0.202	8007	16745	60	0.00887	22088	0.00675	7.032
ELK4	MA0076.1	Winged Helix-Turn-Helix	Ets	14	3.038	vertebrates	14.123	0.583	6034	18718	26	0.00314	9342	0.00234	4.528
Mycn	MA0104.2	Zipper-Type	Helix-Loop-Helix	14	1.043	vertebrates	11.104	0.699	8332	16420	33	0.00443	18928	0.00526	-3.137
Lhx3	MA0135.1	Helix-Turn-Helix	Homeo	13	2.609	vertebrates	16.354	0.131	5806	18946	31	0.00542	12758	0.00461	3.222
NF-kappaB	MA0061.1	Ig-fold	Rel	13	0.7	vertebrates	13.345	0.621	8381	16371	40	0.00538	18865	0.00524	0.477
INSM1	MA0155.1	Zinc-coordinating	BetaBetaAlpha-zinc finger	13	1.098	vertebrates	14.862	0.667	7588	17164	27	0.00435	17685	0.0059	-5.522
Pou5f1	MA0142.1	Helix-Turn-Helix	Homeo	12	5.813	vertebrates	14.808	0.308	3402	21350	19	0.00383	5205	0.00217	9.695
IRF1	MA0050.1	Winged Helix-Turn-Helix	IRF	12	1.734	vertebrates	16.008	0.383	6075	18677	34	0.00548	11517	0.00384	7.214
Spz1	MA0111.1	Other	Other	12	1.283	vertebrates	11.907	0.538	6658	18094	33	0.00488	12530	0.00383	4.599
TAL1::TCF3	MA0091.1	Zipper-Type	Helix-Loop-Helix	12	0.803	vertebrates	14.07	0.453	7491	17261	32	0.00516	14681	0.0049	1.009
Nr2e3	MA0164.1	Zinc-coordinating	Hormone-nuclear Receptor	12	1.505	vertebrates	12.028	0.373	6354	18398	24	0.00226	12287	0.00239	-0.777
Egr1	MA0162.1	Zinc-coordinating	BetaBetaAlpha-zinc finger	12	1.497	vertebrates	14.456	0.739	6364	18388	23	0.0034	12188	0.00373	-1.488
E2F1	MA0024.1	Winged Helix-Turn-Helix	E2F	12	0.546	vertebrates	13.838	0.625	8113	16639	30	0.00323	17630	0.00392	-3.06
RORA1	MA0071.1	Zinc-coordinating	Hormone-nuclear Receptor	12	0.387	vertebrates	13.19	0.424	8624	16128	27	0.00363	18895	0.00525	-6.149
HLF	MA0043.1	Zipper-Type	Leucine Zipper	11	1.697	vertebrates	11.147	0.394	5508	19244	30	0.00484	9969	0.00332	7.141
Zfp423	MA0116.1	Zinc-coordinating	BetaBetaAlpha-zinc finger	11	1.54	vertebrates	17.925	0.679	5691	19061	25	0.00504	10149	0.00423	3.372
NHLH1	MA0048.1	Zipper-Type	Helix-Loop-Helix	11	1.466	vertebrates	14.132	0.674	5783	18969	22	0.00355	9874	0.00329	1.183
NFYA	MA0060.1	Other Alpha-Helix	NFY CCAAT-binding	11	1.403	vertebrates	12.925	0.523	5865	18887	18	0.00387	9476	0.00421	-1.473
Ddit3::Cebpa	MA0019.1	Zipper-Type	Leucine Zipper	10	1.16	vertebrates	11.652	0.483	5576	19176	32	0.00516	9754	0.00325	9.108
FOXF2	MA0030.1	Winged Helix-Turn-Helix	Forkhead	10	2.605	vertebrates	14.824	0.334	4097	20655	20	0.00376	6459	0.00251	6.774
PPARG::RXRA	MA0065.2	Zinc-coordinating	Hormone-nuclear Receptor	10	0.862	vertebrates	11.663	0.547	6067	18685	22	0.00443	11080	0.00462	-0.766
TEAD1	MA0090.1	Helix-Turn-Helix	Homeo	9	0.977	vertebrates	15.678	0.507	5222	19530	13	0.0021	8446	0.00282	-3.741
HNF4A	MA0114.1	Zinc-coordinating	Hormone-nuclear Receptor	9	0.441	vertebrates	9.617	0.522	6389	18363	18	0.00314	11240	0.00406	-3.958
Sox2	MA0143.1	Other Alpha-Helix	High Mobility Group	8	2.944	vertebrates	12.951	0.361	2809	21943	13	0.00262	3844	0.0016	6.899
RORA2	MA0072.1	Zinc-coordinating	Hormone-nuclear Receptor	8	1.862	vertebrates	17.425	0.369	3571	21181	13	0.00245	5079	0.00198	2.845
PBX1	MA0070.1	Helix-Turn-Helix	Homeo	8	1.333	vertebrates	14.641	0.31	4107	20645	14	0.00226	6634	0.00221	0.225
Pax6	MA0069.1	Helix-Turn-Helix	Homeo	7	6.226	vertebrates	13.798	0.432	1218	23534	7	0.00132	1377	0.000536	9.131
Tal1::Gata1	MA0140.1	Zipper-Type	Helix-Loop-Helix	7	0.156	vertebrates	11.297	0.451	6212	18540	18	0.00435	11200	0.0056	-4.586
ESR2	MA0258.1	Zinc-coordinating	Hormone-nuclear Receptor	6	2.21	vertebrates	13.618	0.546	2219	22533	6	0.00145	2670	0.00134	0.815
HNF1B	MA0153.1	Helix-Turn-Helix	Homeo	6	0.523	vertebrates	16.821	0.222	4107	20645	14	0.00226	6910	0.0023	-0.303
CTCF	MA0139.1	Zinc-coordinating	BetaBetaAlpha-zinc finger	6	1.04	vertebrates	17.205	0.645	3236	21516	8	0.00204	3982	0.0021	-0.396
MYC::MAX	MA0059.1	Zipper-Type	Helix-Loop-Helix	6	0.892	vertebrates	14.237	0.602	3436	21316	9	0.00133	4535	0.00139	-0.459
HNF1A	MA0046.1	Helix-Turn-Helix	Homeo	6	1.202	vertebrates	15.548	0.259	3044	21708	8	0.00151	4352	0.00169	-1.292
NFKB1	MA0105.1	Ig-fold	Rel	6	0.596	vertebrates	15.627	0.758	3946	20806	11	0.00163	6372	0.00195	-2.032
STAT1	MA0137.2	Ig-fold	Stat	6	0.059	vertebrates	13.119	0.452	6394	18358	14	0.00282	10990	0.00458	-7.132
Pax5	MA0014.1	Helix-Turn-Helix	Homeo	5	3.361	vertebrates	12.432	0.575	1224	23528	5	0.00134	1364	0.000758	5.739
RREB1	MA0073.1	Zinc-coordinating	BetaBetaAlpha-zinc finger	5	2.597	vertebrates	22.278	0.623	1520	23232	6	0.00161	1839	0.00102	4.984
MIZF	MA0131.1	Zinc-coordinating	BetaBetaAlpha-zinc finger	5	1.626	vertebrates	13.197	0.61	2080	22672	6	0.000806	2497	0.000694	1.095
T	MA0009.1	Beta-Hairpin-Ribbon	T	5	2.033	vertebrates	17.863	0.452	1811	22941	5	0.000739	2114	0.000646	0.925
NR2F1	MA0017.1	Zinc-coordinating	Hormone-nuclear Receptor	5	0.393	vertebrates	15.924	0.478	3735	21017	5	0.000941	5073	0.00197	-6.39
Ar	MA0007.1	Zinc-coordinating	Hormone-nuclear Receptor	4	4.801	vertebrates	15.703	0.498	534	24218	4	0.00118	554	0.000339	12.411
NR3C1	MA0113.1	Zinc-coordinating	Hormone-nuclear Receptor	4	0.637	vertebrates	14.749	0.432	2522	22230	10	0.00242	3161	0.00158	5.706
Evi1	MA0029.1	Zinc-coordinating	BetaBetaAlpha-zinc finger	3	0.581	vertebrates	17.909	0.28	1931	22821	5	0.000941	2457	0.000956	-0.193
Pax4	MA0068.1	Helix-Turn-Helix	Homeo	2	4.376	vertebrates	11.004	0.441	112	24640	2	0.000806	113	9.42e-05	19.826
RXRA::VDR	MA0074.1	Zinc-coordinating	Hormone-nuclear Receptor	2	1.914	vertebrates	20.451	0.527	453	24299	2	0.000403	475	0.000198	3.847
znf143	MA0088.1	Zinc-coordinating	BetaBetaAlpha-zinc finger	2	0.534	vertebrates	17.541	0.53	1301	23451	3	0.000806	1473	0.000819	-0.182
RXR::RAR_DR5	MA0159.1	Zinc-coordinating	Hormone-nuclear Receptor	2	0.526	vertebrates	16.004	0.535	1313	23439	3	0.000685	1499	0.000708	-0.302
TLX1::NFIC	MA0119.1	Helix-Turn-Helix::Other	Homeo::Nuclear Factor I-CCAAT-binding	2	0.739	vertebrates	19.665	0.598	1066	23686	2	0.000376	1162	0.000452	-1.059
PLAG1	MA0163.1	Zinc-coordinating	BetaBetaAlpha-zinc finger	2	0.217	vertebrates	19.352	0.798	1971	22781	3	0.000564	2462	0.000958	-3.528
IRF2	MA0051.1	Winged Helix-Turn-Helix	IRF	1	0.324	vertebrates	21.134	0.412	844	23908	1	0.000242	923	0.000462	-2.876
TP53	MA0106.1	Zinc-coordinating	Loop-Sheet-Helix	0	0	vertebrates	26.239	0.603	8	24744	0	0	8	4.45e-06	-1.444
PPARG	MA0066.1	Zinc-coordinating	Hormone-nuclear Receptor	0	0	vertebrates	20.365	0.523	62	24690	0	0	64	3.56e-05	-1.934
NR1H2::RXRA	MA0115.1	Zinc-coordinating	Hormone-nuclear Receptor	0	0	vertebrates	27.878	0.445	99	24653	0	0	100	4.72e-05	-2.142
EWSR1-FLI1	MA0149.1	Winged Helix-Turn-Helix	Ets	0	0	vertebrates	32.871	0.554	207	24545	0	0	209	0.000105	-2.969
REST	MA0138.2	Zinc-coordinating	BetaBetaAlpha-zinc finger	0	0	vertebrates	23.134	0.596	232	24520	0	0	242	0.000141	-3.396
ESR1	MA0112.2	Zinc-coordinating	Hormone-nuclear Receptor	0	0	vertebrates	13.563	0.594	345	24407	0	0	355	0.000197	-3.963
SRF	MA0083.1	Other Alpha-Helix	MADS	0	0	vertebrates	17.965	0.466	908	23844	0	0	1019	0.00034	-5.129

## Sheet: Common_TF_Hits
ST2: Summary of the TFs in silico analysis including oPOSSUM, PASTAA and miRwalk results
TFs	Common target gene hits	ITGA6 TFs	Target of miR-302b	miRWalk	Microt4	miRanda	mirbridge	miRDB	miRMap	miRNAMap	Pictar2	PITA	RNA22	RNAhybrid	Targetscan
IRF1	12	Yes	8	1	1	1	0	0	1	0	0	1	1	1	1
FOXO3	22	Yes	8	1	1	1	0	0	1	1	0	0	1	1	1
E2F1	12	Yes	6	0	1	1	0	0	1	0	0	1	0	1	1
SP1	17	Yes	5	1	0	0	0	0	1	0	0	1	1	1	0
YY1	26	Yes	3	1	1	0	0	0	0	0	0	0	0	1	0
CEBPA	24	Yes	2	1	0	0	0	0	0	0	0	0	0	1	0
MZF1	25	Yes	1	0	0	0	0	0	0	0	0	0	0	1	0
ELK1	24	Yes	1	0	0	0	0	0	0	0	0	0	0	1	0
NKX25	31	Yes	0
SRY	24	Yes	0
AP1	29	Yes	0
TBP	22	Yes	0
IRF2	1	No	9	1	1	1	0	1	1	0	1	1	0	1	1
STAT1	6	No	1	0	0	0	0	0	0	0	0	0	0	1	0
RREB1	5	No	1	0	0	0	0	0	0	0	0	0	0	1	0
RORA1	12	No	0
	Further candidates
