# Supplementary material for: MiR-302b as a Combinatorial Therapeutic Approach to Improve Cisplatin Chemotherapy Efficacy in Human Triple-Negative Breast Cancer
Source: Cancers (Basel). 2020 Aug 12;12(8):2261. doi: 10.3390/cancers12082261 (PMC7464985; doi:10.3390/cancers12082261)
Supplement: Supplementary file 1 [file cancers-12-02261-s001.zip › ST3.xlsx]

## Sheet: Summary
ST3: Summary of in-silico JASPAR analysis of the selected TFs.
TFs	Jasper>90
YY1	11
SP1	3
E2F1	1
IRF1	0
FOXO3	0
	Candidate genes

## Sheet: YY1_JASPAR
ST3: Summary of in-silico JASPAR analysis of the selected TFs.
Matrix ID	Name	Score	Relative score	Sequence ID	Start	End	Strand	Predicted sequence
MA0095.1	YY1	8.19127	0.990201	hg19_knownGene_uc010zdy.1	666	671	-	accatc
MA0095.1	YY1	8.19127	0.990201	hg19_knownGene_uc010zdy.1	1253	1258	-	accatc
MA0095.1	YY1	7.21934	0.940561	hg19_knownGene_uc010zdy.1	1027	1032	+	gccatt
MA0095.1	YY1	7.21934	0.940561	hg19_knownGene_uc010zdy.1	1920	1925	+	gccatg
MA0095.1	YY1	7.21934	0.940561	hg19_knownGene_uc010zdy.1	2245	2250	-	gccatt
MA0095.1	YY1	7.21934	0.940561	hg19_knownGene_uc010zdy.1	2704	2709	-	gccatt
MA0095.1	YY1	7.02748	0.930762	hg19_knownGene_uc010zdy.1	557	562	+	accatt
MA0095.1	YY1	7.02748	0.930762	hg19_knownGene_uc010zdy.1	1074	1079	-	accatt
MA0095.1	YY1	7.02748	0.930762	hg19_knownGene_uc010zdy.1	1316	1321	+	accatt
MA0095.1	YY1	7.02748	0.930762	hg19_knownGene_uc010zdy.1	1951	1956	+	accatg
MA0095.1	YY1	7.02748	0.930762	hg19_knownGene_uc010zdy.1	2174	2179	-	accata
MA0095.1	YY1	6.39962	0.898695	hg19_knownGene_uc010zdy.1	483	488	+	cccatc
MA0095.1	YY1	6.39962	0.898695	hg19_knownGene_uc010zdy.1	843	848	-	cccatc
MA0095.1	YY1	6.39962	0.898695	hg19_knownGene_uc010zdy.1	1398	1403	+	cccatc
MA0095.1	YY1	6.39962	0.898695	hg19_knownGene_uc010zdy.1	2556	2561	+	cccatc
MA0095.1	YY1	6.22486	0.889769	hg19_knownGene_uc010zdy.1	308	313	-	tccatt
MA0095.1	YY1	6.22486	0.889769	hg19_knownGene_uc010zdy.1	834	839	+	tccatt
MA0095.2	YY1	9.74928	0.866328	hg19_knownGene_uc010zdy.1	554	565	-	caaaatggtgag
MA0095.1	YY1	5.23583	0.839256	hg19_knownGene_uc010zdy.1	51	56	+	cccatg
MA0095.1	YY1	5.23583	0.839256	hg19_knownGene_uc010zdy.1	145	150	+	cccatt
MA0095.1	YY1	5.23583	0.839256	hg19_knownGene_uc010zdy.1	428	433	+	cccatt
MA0095.1	YY1	5.23583	0.839256	hg19_knownGene_uc010zdy.1	1139	1144	-	cccatg
MA0095.1	YY1	5.23583	0.839256	hg19_knownGene_uc010zdy.1	1238	1243	-	cccatt
MA0095.1	YY1	5.23583	0.839256	hg19_knownGene_uc010zdy.1	1922	1927	-	cccatg
MA0095.1	YY1	5.23583	0.839256	hg19_knownGene_uc010zdy.1	1953	1958	-	cccatg
MA0095.1	YY1	5.12323	0.833506	hg19_knownGene_uc010zdy.1	1038	1043	+	atcatc
MA0095.1	YY1	5.12323	0.833506	hg19_knownGene_uc010zdy.1	1563	1568	+	atcatc
MA0095.1	YY1	5.12323	0.833506	hg19_knownGene_uc010zdy.1	1702	1707	-	atcatc
MA0095.2	YY1	6.52329	0.819521	hg19_knownGene_uc010zdy.1	395	406	-	caagattgcacc
MA0095.2	YY1	6.4912	0.819056	hg19_knownGene_uc010zdy.1	2242	2253	+	cataatggcaaa
MA0095.2	YY1	6.29086	0.816149	hg19_knownGene_uc010zdy.1	749	760	-	caacatagatgc
MA0095.2	YY1	5.59982	0.806122	hg19_knownGene_uc010zdy.1	1860	1871	+	aaagagggctcc

## Sheet: E2F1_JASPAR
ST3: Summary of in-silico JASPAR analysis of the selected TFs.
Matrix ID	Name	Score	Relative score	Sequence ID	Start	End	Strand	Predicted sequence
MA0024.2	E2F1	11.2305	0.936981	hg19_knownGene_uc010zdy.1	2536	2546	-	gtggcgccagg
MA0024.1	E2F1	8.83194	0.910251	hg19_knownGene_uc010zdy.1	210	217	+	tttggccc
MA0024.2	E2F1	6.71752	0.909085	hg19_knownGene_uc010zdy.1	601	611	-	gaggtgggagg
MA0024.2	E2F1	5.98506	0.908065	hg19_knownGene_uc010zdy.1	634	644	+	taggcgtgagc
MA0024.2	E2F1	5.88613	0.856577	hg19_knownGene_uc010zdy.1	2416	2426	+	gaggcaggagc
MA0024.2	E2F1	5.86001	0.856184	hg19_knownGene_uc010zdy.1	1275	1285	+	agggcagcagc
MA0024.3	E2F1	9.87118	0.853991	hg19_knownGene_uc010zdy.1	2536	2547	-	agtggcgccagg
MA0024.2	E2F1	5.48272	0.850508	hg19_knownGene_uc010zdy.1	799	809	+	caggtggcagg
MA0024.2	E2F1	5.45047	0.850022	hg19_knownGene_uc010zdy.1	2413	2423	+	ctggaggcagg
MA0024.2	E2F1	5.17594	0.845892	hg19_knownGene_uc010zdy.1	1798	1808	-	agagcaggagc
MA0024.2	E2F1	5.06681	0.84425	hg19_knownGene_uc010zdy.1	456	466	-	tactcgggagg
MA0024.3	E2F1	9.10981	0.841314	hg19_knownGene_uc010zdy.1	2536	2547	+	cctggcgccact
MA0024.3	E2F1	8.73674	0.835103	hg19_knownGene_uc010zdy.1	210	221	+	tttggccccaga
MA0024.3	E2F1	8.68748	0.834282	hg19_knownGene_uc010zdy.1	210	221	-	tctggggccaaa
MA0024.2	E2F1	3.59882	0.822165	hg19_knownGene_uc010zdy.1	210	220	-	ctggggccaaa
MA0024.2	E2F1	3.0914	0.814531	hg19_knownGene_uc010zdy.1	211	221	+	ttggccccaga
MA0024.2	E2F1	2.41046	0.804286	hg19_knownGene_uc010zdy.1	2369	2379	-	ctaggggcaac
MA0024.2	E2F1	2.28807	0.802445	hg19_knownGene_uc010zdy.1	161	171	-	ggggagggagt

## Sheet: SP1_JASPAR
ST3: Summary of in-silico JASPAR analysis of the selected TFs.
Matrix ID	Name	Score	Relative score	Sequence ID	Start	End	Strand	Predicted sequence
MA0079.3	SP1	12.8206	0.942439	hg19_knownGene_uc010zdy.1	2398	2408	+	gccccgcctca
MA0079.3	SP1	10.8037	0.917064	hg19_knownGene_uc010zdy.1	162	172	+	ctccctcccca
MA0079.1	SP1	9.30469	0.911425	hg19_knownGene_uc010zdy.1	534	543	+	ggggttgggt
MA0079.3	SP1	8.94746	0.89371	hg19_knownGene_uc010zdy.1	538	548	-	cccccacccaa
MA0079.1	SP1	8.63949	0.888222	hg19_knownGene_uc010zdy.1	529	538	+	gtggtggggt
MA0079.3	SP1	8.2748	0.885247	hg19_knownGene_uc010zdy.1	602	612	+	ctcccacctcg
MA0079.1	SP1	8.27367	0.875462	hg19_knownGene_uc010zdy.1	1245	1254	+	agggcaggga
MA0079.3	SP1	7.28063	0.872739	hg19_knownGene_uc010zdy.1	1239	1249	-	gccctgcccat
MA0079.3	SP1	7.24408	0.87228	hg19_knownGene_uc010zdy.1	2630	2640	-	gttccgccttg
MA0079.1	SP1	8.11932	0.870078	hg19_knownGene_uc010zdy.1	2705	2714	+	atggctgggt
MA0079.3	SP1	6.85053	0.867328	hg19_knownGene_uc010zdy.1	1776	1786	+	cccctacccct
MA0079.1	SP1	8.03313	0.867071	hg19_knownGene_uc010zdy.1	607	616	-	gaggcgaggt
MA0079.1	SP1	7.99575	0.865767	hg19_knownGene_uc010zdy.1	542	551	+	gtggggggga
MA0079.1	SP1	7.86286	0.861132	hg19_knownGene_uc010zdy.1	163	172	-	tggggaggga
MA0079.3	SP1	6.25096	0.859785	hg19_knownGene_uc010zdy.1	2415	2425	-	ctcctgcctcc
MA0079.1	SP1	7.8002	0.858946	hg19_knownGene_uc010zdy.1	2398	2407	-	gaggcggggc
MA0079.3	SP1	5.89834	0.855349	hg19_knownGene_uc010zdy.1	525	535	-	ccaccaccccg
MA0079.3	SP1	5.81522	0.854303	hg19_knownGene_uc010zdy.1	1775	1785	+	acccctacccc
MA0079.4	SP1	6.39351	0.85337	hg19_knownGene_uc010zdy.1	1769	1783	+	gaggccacccctacc
MA0079.1	SP1	7.52228	0.849252	hg19_knownGene_uc010zdy.1	544	553	+	gggggggagt
MA0079.1	SP1	7.47558	0.847623	hg19_knownGene_uc010zdy.1	874	883	-	aaggctggga
MA0079.3	SP1	5.19603	0.846513	hg19_knownGene_uc010zdy.1	528	538	-	accccaccacc
MA0079.4	SP1	5.55147	0.845912	hg19_knownGene_uc010zdy.1	2395	2409	+	ggagccccgcctcat
MA0079.1	SP1	7.4237	0.845813	hg19_knownGene_uc010zdy.1	521	530	+	gagacggggt
MA0079.3	SP1	4.87026	0.842414	hg19_knownGene_uc010zdy.1	607	617	+	acctcgcctcc
MA0079.3	SP1	4.7167	0.840482	hg19_knownGene_uc010zdy.1	1244	1254	-	tccctgccctg
MA0079.3	SP1	4.5623	0.83854	hg19_knownGene_uc010zdy.1	901	911	+	cctcttcccac
MA0079.1	SP1	7.19766	0.837929	hg19_knownGene_uc010zdy.1	1641	1650	-	aggggtgtgt
MA0079.1	SP1	7.19766	0.837929	hg19_knownGene_uc010zdy.1	2710	2719	+	tgggttgtgt
MA0079.3	SP1	4.2423	0.834514	hg19_knownGene_uc010zdy.1	598	608	+	gatcctcccac
MA0079.3	SP1	4.23185	0.834382	hg19_knownGene_uc010zdy.1	542	552	-	ctcccccccac
MA0079.3	SP1	4.07454	0.832403	hg19_knownGene_uc010zdy.1	2416	2426	-	gctcctgcctc
MA0079.1	SP1	7.00211	0.831108	hg19_knownGene_uc010zdy.1	1240	1249	+	tgggcagggc
MA0079.3	SP1	3.81499	0.829138	hg19_knownGene_uc010zdy.1	520	530	-	accccgtctct
MA0079.3	SP1	3.57462	0.826113	hg19_knownGene_uc010zdy.1	1798	1808	+	gctcctgctct
MA0079.1	SP1	6.81038	0.82442	hg19_knownGene_uc010zdy.1	1934	1943	+	ttggcaggct
MA0079.1	SP1	6.76539	0.822851	hg19_knownGene_uc010zdy.1	524	533	+	acggggtggt
MA0079.1	SP1	6.72419	0.821414	hg19_knownGene_uc010zdy.1	2502	2511	+	ggggctagga
MA0079.1	SP1	6.68681	0.820109	hg19_knownGene_uc010zdy.1	546	555	+	gggggagtct
MA0079.3	SP1	3.04506	0.819451	hg19_knownGene_uc010zdy.1	1245	1255	-	atccctgccct
MA0079.1	SP1	6.6325	0.818215	hg19_knownGene_uc010zdy.1	1249	1258	+	cagggatggt
MA0079.3	SP1	2.80519	0.816433	hg19_knownGene_uc010zdy.1	543	553	-	actccccccca
MA0079.1	SP1	6.53246	0.814726	hg19_knownGene_uc010zdy.1	599	608	-	gtgggaggat
MA0079.4	SP1	1.33613	0.808575	hg19_knownGene_uc010zdy.1	1238	1252	-	cctgccctgcccatt
MA0079.3	SP1	2.08175	0.807331	hg19_knownGene_uc010zdy.1	1904	1914	+	gtcccaacctt
MA0079.3	SP1	2.06571	0.80713	hg19_knownGene_uc010zdy.1	1396	1406	+	accccatctct
MA0079.3	SP1	1.93629	0.805501	hg19_knownGene_uc010zdy.1	533	543	-	acccaacccca
MA0079.3	SP1	1.93555	0.805492	hg19_knownGene_uc010zdy.1	787	797	-	ctcctacctac
MA0079.3	SP1	1.8398	0.804288	hg19_knownGene_uc010zdy.1	93	103	+	ctctctccctt
MA0079.3	SP1	1.80994	0.803912	hg19_knownGene_uc010zdy.1	610	620	+	tcgcctcccaa
MA0079.1	SP1	6.11476	0.800155	hg19_knownGene_uc010zdy.1	1793	1802	-	ggagctgtgt
